# Supplementary material for: Enantioselective hydrogenation of cyclic tetrasubstituted-olefinic dehydroamino acid derivatives
Source: Royal Society of Chemistry journal article supplement (doi:10.1039/d1cc01277k), 2021-01-01
Supplement: d1cc01277k1.pdf [file d1cc01277k1.pdf]

**Enantioselective Hydrogenation of Cyclic Tetrasubstituted-Olefinic  
Dehydroamino Acid Derivatives**

**Supporting Information**

*Feng Wan, Nan Wang, Yuxin Zhu, Chuyan Tang, Jerome Claverie\*, Wenjun Tang\**

E-mail: [tangwenjun@sioc.ac.cn](mailto:tangwenjun@sioc.ac.cn), [Jerome.Claverie@USherbrooke.ca](mailto:Jerome.Claverie@USherbrooke.ca)

**Table of contents**

|                                                                |              |
|----------------------------------------------------------------|--------------|
| <b>1. General considerations.....</b>                          | <b>SI-2</b>  |
| <b>2. Attached Optimization.....</b>                           | <b>SI-2</b>  |
| <b>3. Substrate preparations.....</b>                          | <b>SI-3</b>  |
| <b>4. General procedures for asymmetric hydrogenation.....</b> | <b>SI-14</b> |
| <b>5. Transformation of 2a'.....</b>                           | <b>SI-17</b> |
| <b>6. Original NMR data of substrates.....</b>                 | <b>SI-20</b> |
| <b>7. Original HPLC data of substrates.....</b>                | <b>SI-68</b> |

## 1. General Considerations

All reactions and manipulations were performed in a nitrogen-filled glove box or using standard Schlenk techniques, unless otherwise noted. All ligands and Rh precursors were stored in a nitrogen-filled glove box before use. Chiral ligand intermediates were prepared according to our reported procedures.

$^1\text{H}$  NMR,  $^{31}\text{P}$  NMR,  $^{19}\text{F}$  NMR and  $^{13}\text{C}$  NMR data were recorded on a Bruker-Ultrashield PLUS400 NMR or a 500 MHz Agilent spectrometer with  $\text{CDCl}_3$  or  $(\text{CD}_3)_2\text{SO}$  as the solvent.  $^1\text{H}$  chemical shifts were referenced to  $\text{CDCl}_3$  at 7.26 ppm and  $(\text{CD}_3)_2\text{SO}$  at 2.50.  $^{13}\text{C}$  chemical shifts were referenced to  $\text{CDCl}_3$  at 77.16 ppm and  $(\text{CD}_3)_2\text{SO}$  at 39.52.  $^{31}\text{P}$  chemical shifts were referenced to 85%  $\text{H}_3\text{PO}_4$  in  $\text{D}_2\text{O}$  at 0.0 ppm as external standard and obtained with  $^1\text{H}$  decoupling. Multiplicities are abbreviated as follows: singlet (s), doublet (d), triplet (t), quartet (q), doublet-doublet (dd), quintet (quint), sextet (sextet), septet (septet), multiplet (m), and broad (br). MS was measured on Agilent 7890A/5975C Series GC/MSD mass spectrometer. HPLC yield were determined on Agilent 1200 Infinity Series.

## 2. Attached Optimization

**Table S1. Other investigation on asymmetric hydrogenation of *N*-(4-methyl-2-oxo-5,6-dihydro-2*H*-pyran-3-yl)acetamide (**1a**)**

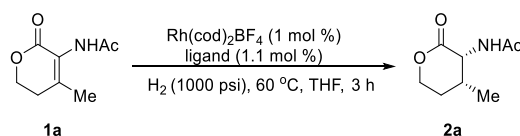

| Entries <sup>a</sup> | Ligand      | Solvent                | Yields (%) | Ee (%) <sup>b</sup> |
|----------------------|-------------|------------------------|------------|---------------------|
| 1                    | ArcPhos(L1) | THF                    | 99         | 90                  |
| 2                    | ArcPhos(L1) | DCM                    | 99         | 70                  |
| 3                    | ArcPhos(L1) | EtOAc                  | 0          | ND                  |
| 4                    | ArcPhos(L1) | $\text{CH}_3\text{CN}$ | 0          | ND                  |
| 5                    | ArcPhos(L1) | DCE                    | 99         | 62                  |
| 6                    | ArcPhos(L1) | <i>i</i> PrOH          | 25         | 70                  |
| 7                    | ArcPhos(L1) | MTBE <sup>c</sup>      | <5         | ND                  |
| 8                    | ArcPhos(L1) | CPME <sup>c</sup>      | <5         | ND                  |

<sup>a</sup>Unless otherwise specified, the reactions were carried out at 60 °C under  $\text{H}_2$  (1000 psi) in THF (0.5 mL) for 3 h with **2a** (0.1 mmol) in the presence of rhodium precursor (1  $\mu\text{mol}$ , 1 mol %) and ligand (1.1  $\mu\text{mol}$ , 1.1 mol %);

<sup>b</sup>Determined by chiral HPLC using a Chiralpak OJ-3 column. <sup>c</sup>MTBE and CPME perform badly for poor solubility.

### 3. Substrate Preparation

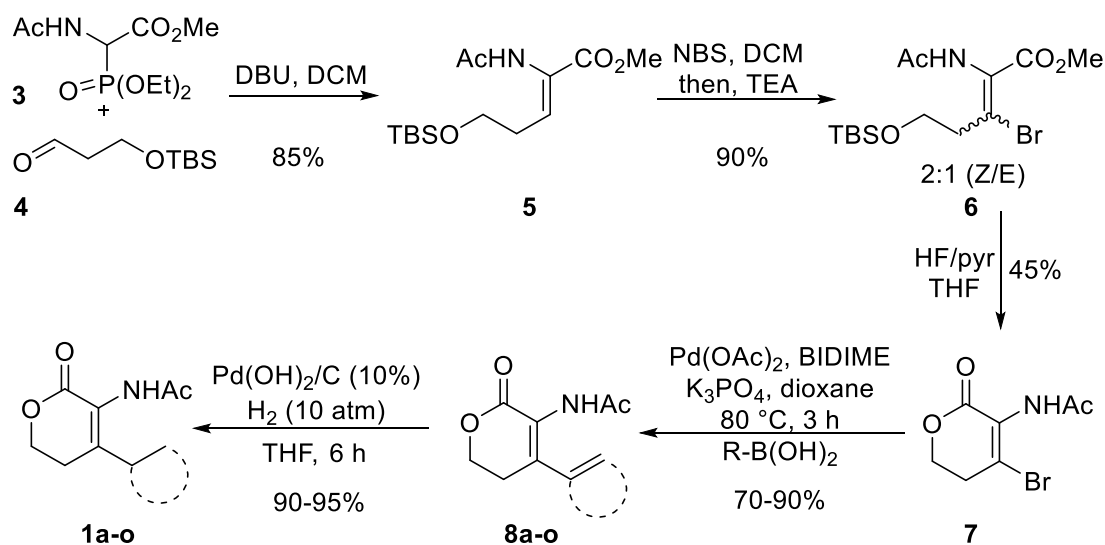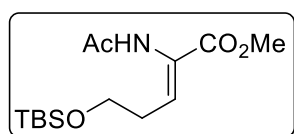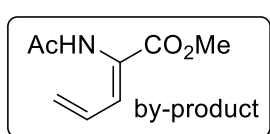

**5:** To a 150 mL Schlenk tube equipped with a mechanical stirrer was charged with compound **3** (1 equiv), dry DCM (30 mL), under N<sub>2</sub> atmosphere. By

slowly adding DBU (2.1 equiv) in DCM via syringe at 0 °C, then the mixture was allowed to react at room temperature for ten minutes. Place the system at 0 °C and slowly drop 3-tert-butyltrimethylsilyloxypropionaldehyde **4** (1.5 equiv) in DCM for 5 minutes. Then the reaction was kept at 0 °C for 10 minutes with TLC monitored (even room temperature or long reaction time will lead to increase of β-elimination by-products). DBU was washed with water, and the mixture was extracted with water (20 mL) and DCM (10 mL x 3), washed with saturated brine, dried over anhydrous sodium sulfate, concentrated, and column chromatography (PE:EA=1:1) to obtain desired product as white solid in 88% yield. <sup>1</sup>H NMR (500 MHz, CDCl<sub>3</sub>) δ 7.37 (s, 1H), 6.62 (t, *J* = 7.5 Hz, 1H), 3.74 (s, 3H), 3.72 (t, *J* = 6.0 Hz, 2H), 2.35 (dd, *J* = 7.5, 6.0 Hz, 2H), 2.07 (s, 3H), 0.87 (s, 10H), 0.04 (s, 6H). <sup>13</sup>C NMR (126 MHz, CDCl<sub>3</sub>) δ 168.6 (s), 165.0 (s), 133.5 (s), 127.5 (s), 62.0 (s), 52.3 (s), 31.8 (s), 25.9 (s), 23.2 (s), 18.3 (s), -5.4 (s). ESI-MS: *m/z* 316. [M+H]<sup>+</sup>, 254.1 [M+Na]<sup>+</sup>; HRMS (ESI) calculated for [M+Na, C<sub>13</sub>H<sub>13</sub>NNaO<sub>3</sub>]<sup>+</sup>: 254.0788; found: 254.0788.

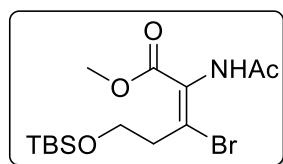

**6:** To a 250 mL Schlenk tube equipped with a mechanical stirrer was charged with compound **5** (1 equiv), DCM (30 mL), under N<sub>2</sub> atmosphere. By slowly adding NBS (1.1 equiv) in portions at 0 °C, the mixture turned pale yellow gradually and then was allowed to react at room temperature for 1 hour. Place

the system at 0 °C and slowly drop TEA (1.5 equiv) for 5 minutes, and the addition should be very slow at first. The suspension would turn brown to black then pale-yellow solution. Then the reaction was kept at room temperature for 30 minutes with TLC monitored. The mixture was extracted with 1 N HCl solution (20 mL) and DCM (10 mL x 3), washed with saturated brine, dried over anhydrous sodium sulfate,

concentrated, and column chromatography (PE:EA=3:1) to obtain desired product as pale yellow solid in 90% yield. The *Z/E* ratio was 2:1 determined by <sup>1</sup>H-NMR. (*Z*)-**6**: <sup>1</sup>H NMR (500 MHz, CDCl<sub>3</sub>) δ 7.00 (s, 1H), 3.85 - 3.75 (m, 5H), 2.98 (t, *J* = 6.4 Hz, 2H), 2.11 (s, 3H), 0.88 (s, 9H), 0.05 (s, 5H). <sup>13</sup>C NMR (126 MHz, CDCl<sub>3</sub>) δ 167.9 (s), 162.8 (s), 123.7 (s), 123.2 (s), 61.2 (s), 52.7 (s), 39.7 (s), 25.8 (s), 22.9 (s), 18.2 (s), -5.4 (s). ESI-MS: *m/z* 394.2, 396.2 [M+H]<sup>+</sup>; HRMS (ESI) calculated for [M+H, C<sub>15</sub>H<sub>29</sub>BrNO<sub>4</sub>Si]<sup>+</sup>: 394.1044, 396.1026; found: 394.1046, 396.025.

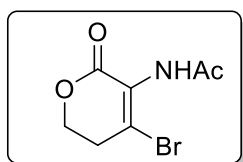

**7**: To a 250 mL Schlenk tube equipped with a mechanical stirrer was charged with *Z/E* mixture of compound **6** (1 equiv), dry THF (30 mL), under N<sub>2</sub> atmosphere. After slowly adding HF/pyr (2 equiv) through syringe at 0 °C, the mixture turned pale yellow gradually and then was allowed to react at room temperature for one day. The forming white salt removed through filtration and the organic layer was concentrated. The mixture was purified through column chromatography (PE:EA=1:4) to obtain desired product as white solid in 45% yield (No olefin isomerization and cyclization process of (*E*)-**7** was monitored). <sup>1</sup>H NMR (500 MHz, DMSO) δ 9.38 (s, 1H), 4.36 (t, *J* = 6.0 Hz, 2H), 3.06 (t, *J* = 6.0 Hz, 2H), 1.93 (s, 3H). <sup>13</sup>C NMR (126 MHz, DMSO) δ 168.6 (s), 159.8 (s), 137.1 (s), 127.1 (s), 65.9 (s), 34.5 (s), 22.8 (s). ESI-MS: *m/z* 234.0, 236.0 [M+H]<sup>+</sup>, 256.0, 258.0 [M+Na]<sup>+</sup>; HRMS (ESI) calculated for [M+Na, C<sub>7</sub>H<sub>8</sub>BrNNaO<sub>3</sub>]<sup>+</sup>: 255.9580; found: 255.9582.

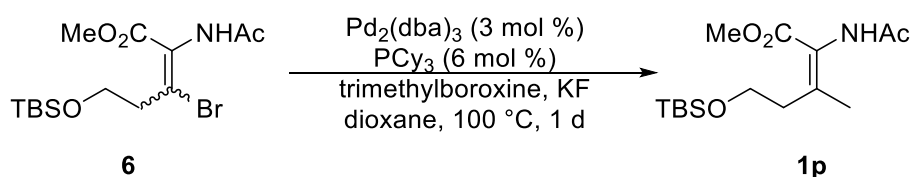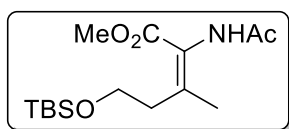

**1p**: To a 150 mL Schlenk tube equipped with a mechanical stirrer was charged with compound **6** (1.0 equiv), Pd<sub>2</sub>(dba)<sub>3</sub> (0.03 equiv), PCy<sub>3</sub> (0.06 equiv), trimethylboroxine (2.0 equiv), KF (2.0 equiv) and dioxane (10 mL), the resulting mixture was purged with nitrogen and stirred under 100°C for 1 day. After full conversion of starting material monitored by TLC, the solvent was removed under vacuum. The mixture was then extracted with H<sub>2</sub>O/EtOAc (three times). The combined organic layers were concentrated and purified by silica gel column chromatography (PE/EA=1:1) to give the desired (*E*)-**1p** in 48% yield ((*Z*)-**1p** was obtained in 23% yield). (*E*)-**1p**: <sup>1</sup>H NMR (500 MHz, CDCl<sub>3</sub>) δ 6.57 (s, 1H), 3.74 (s, 3H), 3.64 (t, *J* = 6.4 Hz, 2H), 2.58 - 2.52 (m, 2H), 2.08 (s, 3H), 1.84 (s, 3H), 1.75 - 1.67 (m, 3H), 0.89 (s, 9H), 0.04 (s, 6H). <sup>13</sup>C NMR (126 MHz, CDCl<sub>3</sub>) δ 168.5 (s), δ 165.1 (s), 148.8 (s), 121.3 (s), 62.9 (s), 51.8 (s), 31.5 (s), 31.1 (s), 25.9 (s), 23.1 (s), 20.4 (s), 18.3 (s), -5.3 (s). ESI-MS: *m/z* 316.2 [M+H]<sup>+</sup>, 338.2 [M+Na]<sup>+</sup>; HRMS (ESI) calculated for [M+Na, C<sub>15</sub>H<sub>29</sub>NNaO<sub>4</sub>Si]<sup>+</sup>: 338.1758; found: 338.1763.

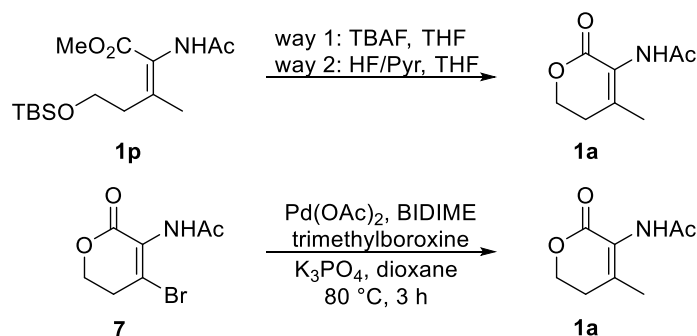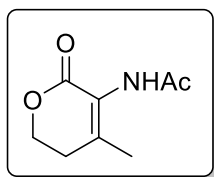

**2a:** ① To a 150 mL Schlenk tube equipped with a mechanical stirrer was charged with compound **7** (1.0 equiv), Pd(OAc)<sub>2</sub> (0.03 equiv), BI-DIME (0.06 equiv), trimethylboroxine (2.0 equiv), K<sub>3</sub>PO<sub>4</sub> (2.0 equiv) and dioxane (10 mL), the resulting mixture was purged with nitrogen and stirred under 80 °C for 3 h. After full conversion of starting material monitored by TLC, the solvent was removed under vacuum. The mixture was then extracted with H<sub>2</sub>O/EtOAc (three times). The combined organic layers were concentrated and purified by silica gel column chromatography to give the desired product compound as white solid in 93% yield. ② To a 150 mL Schlenk tube equipped with a mechanical stirrer was charged with compound **7** (1.0 equiv), TBAF in THF (1.5 equiv.) and THF (10 mL). The solution was kept at r.t. for 3 h. The mixture was then extracted with H<sub>2</sub>O/EtOAc (three times). The combined organic layers were concentrated and purified by silica gel column chromatography to give the desired product compound as white solid in 82% yield. ③ To a 150 mL Schlenk tube equipped with a mechanical stirrer was charged with compound **7** (1.0 equiv), HF/pyr (2.0 equiv.) and THF (10 mL). The solution was kept at r.t. for 24 h. The mixture was then extracted with H<sub>2</sub>O/EtOAc (three times). The combined organic layers were concentrated and purified by silica gel column chromatography to give the desired product compound as white solid in 75% yield. <sup>1</sup>H NMR (400 MHz, CDCl<sub>3</sub>) δ 7.19 (s, 1H), 4.41 (t, *J* = 6.2 Hz, 2H), 2.59 (t, *J* = 6.2 Hz, 2H), 2.14 (s, 3H), 1.91 (s, 3H). <sup>13</sup>C NMR (126 MHz, CDCl<sub>3</sub>) δ 168.0 (s), 164.0 (s), 146.4 (s), 120.4 (s), 77.3 (s), 77.0 (s), 76.8 (s), 65.4 (s), 30.5 (s), 23.6 (s), 20.5 (s). ESI-MS: *m/z* 191.95 [M+Na]<sup>+</sup>; HRMS (ESI) calculated for [M+Na]<sup>+</sup>:192.0631; found: 192.0631.

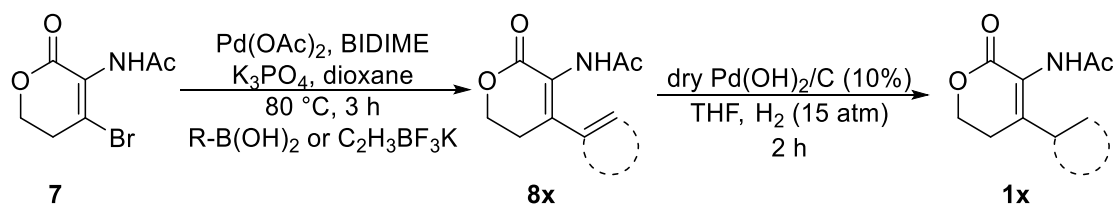

Produce A: To a 150 mL Schlenk tube equipped with a mechanical stirrer was charged with compound **7** (1.0 equiv), Pd(OAc)<sub>2</sub> (0.03 equiv), BI-DIME (0.06 equiv), alkenyl boric acid or vinylboronic acid trifluoroborate potassium (2.0 equiv), K<sub>3</sub>PO<sub>4</sub> (2.0 equiv) and dioxane (10 mL), the resulting mixture was purged with nitrogen and stirred under 80°C for 3h. After full conversion of starting material monitored by TLC, the solvent

was removed under vacuum. The mixture was then extracted with H<sub>2</sub>O/EtOAc (three times). The combined organic layers were concentrated and purified by silica gel column chromatography to give the desired product compound **8x**.

Produce B: To a 10 mL round-bottom flask equipped with a mechanical stirrer was charged with compound **8x** (**x=b-I**, 1 equiv), Pd(OH)<sub>2</sub>/C (20%, <0.5% H<sub>2</sub>O, 10% wt%) and dry THF (2 ml), the resulting mixture was purged with hydrogen and stirred under 10 atm, 30 °C for 6 h. After full conversion of starting material monitored by TLC, the solid magazines were removed by filtration through kieselguhr and washed with THF, then the combined organic layer was concentrated to afford pure product.

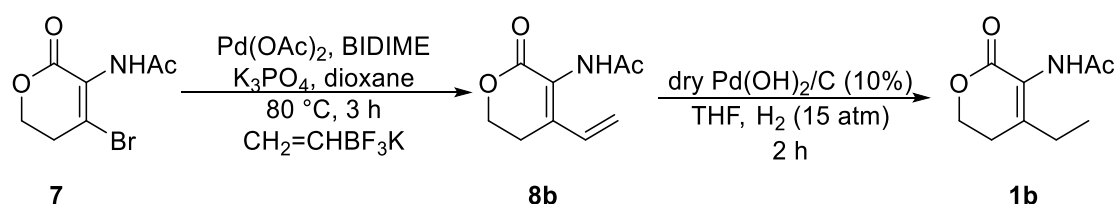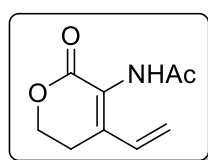

**8b**: Prepared according to procedure A with vinylboronic acid trifluoroborate potassium as white solid in 72% yield. <sup>1</sup>H NMR (500 MHz, CDCl<sub>3</sub>) δ 7.31 (s, 1H), 6.55 (dd, *J* = 17.5, 10.8 Hz, 1H), 5.62 (d, *J* = 17.5 Hz, 1H), 5.56 (d, *J* = 10.8 Hz, 1H), 4.47 (t, *J* = 6.2 Hz, 2H), 2.74 (t, *J* = 6.2 Hz, 2H), 2.17 (s, 3H). <sup>13</sup>C NMR (126 MHz, CDCl<sub>3</sub>) δ 168.7 (s), 164.6 (s), 140.2 (s), 132.3 (s), 121.3 (s), 120.2 (s), 77.3 (s), 77.3 (s), 76.9 (d, *J* = 32.0 Hz), 65.6 (s), 24.1 (s), 23.7 (s). ESI-MS: *m/z* 182.0 [M+H]<sup>+</sup>, 204.0 [M+Na]<sup>+</sup>; HRMS (ESI) calculated for [M+Na, C<sub>9</sub>H<sub>11</sub>NNaO<sub>3</sub>]<sup>+</sup>: 204.0631; found: 204.0634. bp 82-87 °C

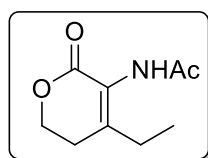

**1b**: Prepared according to procedure B as white solid in 95% yield. <sup>1</sup>H NMR (500 MHz, CDCl<sub>3</sub>) δ 7.15 (s, 1H), 4.40 (t, *J* = 6.2 Hz, 2H), 2.57 (t, *J* = 6.2 Hz, 2H), 2.28 (q, *J* = 7.6 Hz, 2H), 2.12 (s, 3H), 1.08 (t, *J* = 7.6 Hz, 3H). <sup>13</sup>C NMR (126 MHz, CDCl<sub>3</sub>) δ 168.4 (s), δ 164.2 (s), 151.6 (s), 119.4 (s), 65.5 (s), 27.5 (s), 26.6 (s), 23.6 (s), 10.4 (s). ESI-MS: *m/z* 184.0 [M+H]<sup>+</sup>, 206.0 [M+Na]<sup>+</sup>; HRMS (ESI) calculated for [M+Na, C<sub>9</sub>H<sub>13</sub>NNaO<sub>3</sub>]<sup>+</sup>: 206.0788; found: 206.0791.

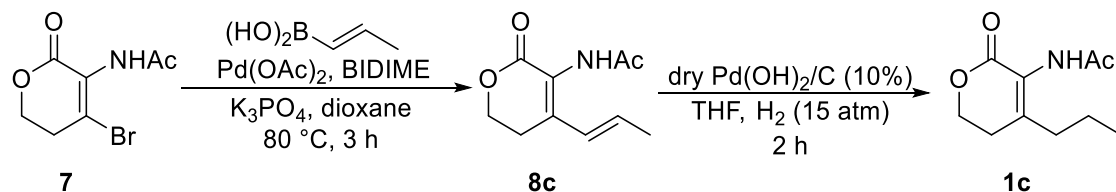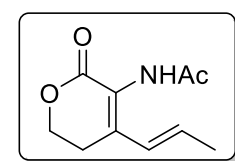

**8c**: Prepared according to procedure A as white solid in 84% yield. <sup>1</sup>H NMR (500 MHz, CDCl<sub>3</sub>) δ 7.30 (s, 1H), 6.26 (m, 1H), 6.18 (m, 1H), 4.42 (t, *J* = 6.2 Hz, 2H), 2.70 (t, *J* = 6.2 Hz, 2H), 2.16 (s, 3H), 1.91 (d, *J* = 6.1 Hz, 3H). <sup>13</sup>C NMR (126 MHz, CDCl<sub>3</sub>) δ 168.7 (s), 164.9 (s), 141.6 (s), 135.3 (s), 127.2 (s), 118.1 (s), 65.4 (s), 24.8

(s), 23.7 (s), 19.2 (s). ESI-MS:  $m/z$  196.1  $[M+H]^+$ , 218.1  $[M+Na]^+$ ; HRMS (ESI) calculated for  $[M+Na, C_{10}H_{13}NNaO_3]^+$ : 218.0788; found: 218.0786.

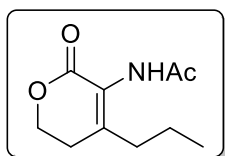

**1c:** Prepared according to procedure B as white solid in 97% yield.  $^1H$  NMR (500 MHz,  $CDCl_3$ )  $\delta$  7.19 (s, 1H), 4.39 (t,  $J = 6.1$  Hz, 2H), 2.55 (t,  $J = 6.1$  Hz, 2H), 2.27 - 2.20 (m, 2H), 2.11 (s, 3H), 1.50 (dd,  $J = 15.3, 7.5$  Hz, 2H), 0.91 (t,  $J = 7.3$  Hz, 3H).  $^{13}C$  NMR (126 MHz,  $CDCl_3$ )  $\delta$  168.5 (s), 164.1 (s), 150.9 (s), 120.0 (s), 77.2 (d,  $J = 32.0$  Hz), 77.0 (s), 76.9 (d,  $J = 32.0$  Hz), 65.5 (s), 35.5 (s), 28.0 (s), 23.5 (s), 19.4 (s), 14.1 (s). ESI-MS:  $m/z$  198.1  $[M+H]^+$ , 220.1  $[M+Na]^+$ ; HRMS (ESI) calculated for  $[M+Na, C_{10}H_{15}NNaO_3]^+$ : 220.0944; found: 220.0938.

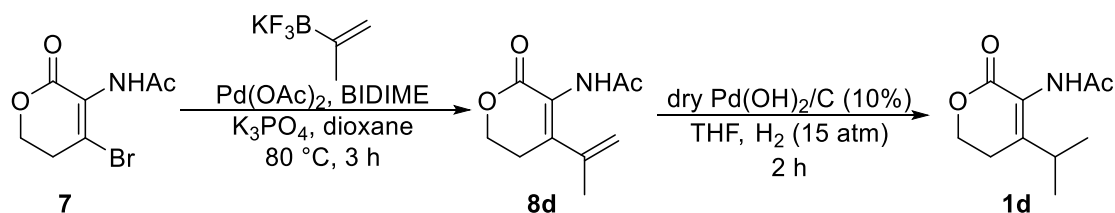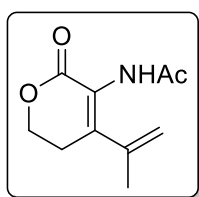

**8d:** Prepared according to procedure A as white solid in 35% yield (An undesired side product was formed with condition of procedure A).  $^1H$  NMR (500 MHz,  $CDCl_3$ )  $\delta$  7.21 (s, 1H), 5.13 (d,  $J = 20.9$  Hz, 2H), 4.43 (t,  $J = 6.1$  Hz, 2H), 2.67 (t,  $J = 6.1$  Hz, 2H), 2.07 (s, 3H), 1.92 (s, 3H).  $^{13}C$  NMR (126 MHz,  $CDCl_3$ )  $\delta$  168.0 (s), 164.4 (s), 146.2 (s), 141.5 (s), 119.0 (s), 117.2 (s), 65.6 (s), 28.3 (s), 23.7 (s), 20.0 (s). ESI-MS:  $m/z$  196.1  $[M+H]^+$ , 218.1  $[M+Na]^+$ ; HRMS (ESI) calculated for  $[M+Na, C_{10}H_{13}NNaO_3]^+$ : 218.0788; found: 218.0792.

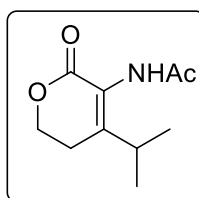

**1d:** Prepared according to procedure B as white solid in 96% yield.  $^1H$  NMR (500 MHz,  $CDCl_3$ )  $\delta$  6.96 (s, 1H), 4.39 (t,  $J = 6.1$  Hz, 2H), 2.84 (m, 1H), 2.51 (t,  $J = 6.1$  Hz, 2H), 2.12 (s, 3H), 1.08 (d,  $J = 6.8$  Hz, 6H).  $^{13}C$  NMR (126 MHz,  $CDCl_3$ )  $\delta$  169.0 (s), 164.2 (s), 156.4 (s), 118.4 (s), 65.6 (s), 30.6 (s), 23.5 (s), 23.2 (s), 19.6 (s). ESI-MS:  $m/z$  198.1  $[M+H]^+$ , 220.1  $[M+Na]^+$ ; HRMS (ESI) calculated for  $[M+Na, C_{10}H_{15}NNaO_3]^+$ : 220.0944; found: 220.0946.

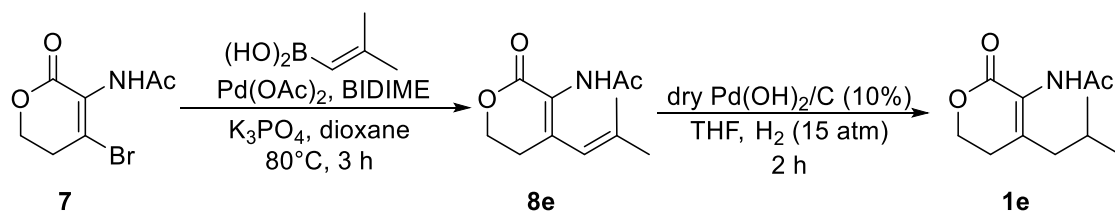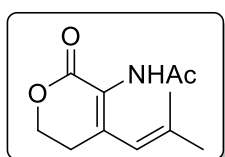

**8e:** Prepared according to procedure A as white solid in 98% yield.  $^1H$  NMR (500 MHz,  $CDCl_3$ )  $\delta$  7.35 (s, 1H), 5.84 (s, 1H), 4.35 (t,  $J = 6.1$  Hz, 2H), 2.70 (t,  $J = 5.8$  Hz, 2H), 2.05 (s, 3H), 1.82 (s, 3H), 1.73 (s, 3H).  $^{13}C$  NMR (126 MHz,  $CDCl_3$ )  $\delta$  168.3 (s), 164.2 (s),

144.7 (s), 142.3 (s), 121.4 (s), 119.7 (s), 77.4 (s), 77.1 (s), 76.9 (s), 65.6 (s), 29.2 (s), 27.7 (s), 23.3 (s), 20.8 (s). ESI-MS:  $m/z$  210.1  $[M+H]^+$ , 232.1  $[M+Na]^+$ ; HRMS (ESI) calculated for  $[M+H, C_{11}H_{16}NO_3]^+$ : 210.1125; found: 210.1130.

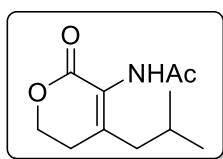

**1e:** Prepared according to procedure B as white solid in 95% yield.  $^1H$  NMR (500 MHz,  $CDCl_3$ )  $\delta$  7.16 (s, 1H), 4.38 (t,  $J = 6.1$  Hz, 2H), 2.54 (t,  $J = 6.1$  Hz, 2H), 2.17 (d,  $J = 7.4$  Hz, 2H), 2.10 (s, 3H), 1.84 (td,  $J = 7.4, 8.3$  Hz, 1H), 0.86 (t,  $J = 8.3$  Hz, 6H).  $^{13}C$  NMR (126 MHz,  $CDCl_3$ )  $\delta$  168.5 (s), 164.0 (s), 150.5 (s), 120.7 (s), 65.5 (s), 42.7 (s), 28.5 (s), 25.8 (s), 23.5 (s), 22.5 (s). ESI-MS:  $m/z$  212.1  $[M+H]^+$ , 234.1  $[M+Na]^+$ ; HRMS (ESI) calculated for  $[M+H, C_{14}H_{18}NO_3]^+$ : 212.1281; found: 212.1281.

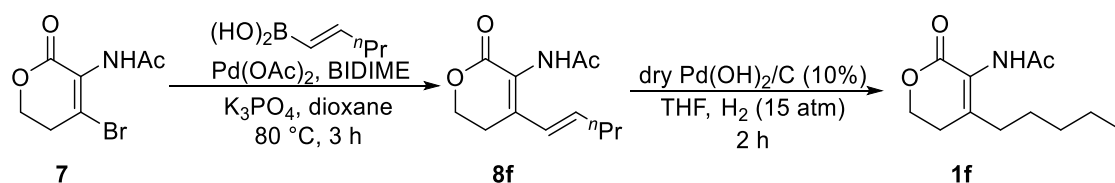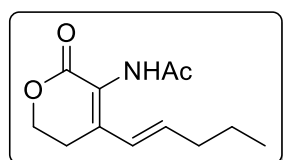

**8f:** Prepared according to procedure A as white solid in 91% yield.  $^1H$  NMR (500 MHz,  $CDCl_3$ )  $\delta$  7.30 (s, 1H), 6.24 (d,  $J = 15.9$  Hz, 1H), 6.19 - 6.11 (m, 1H), 4.43 (t,  $J = 6.2$  Hz, 2H), 2.71 (t,  $J = 6.1$  Hz, 2H), 2.20 (dd,  $J = 14.3, 7.1$  Hz, 2H), 2.15 (s, 3H), 1.45 (dd,  $J = 14.8, 7.4$  Hz, 2H).  $^{13}C$  NMR (126 MHz,  $CDCl_3$ )  $\delta$  168.6 (s), 164.9 (s), 141.6 (s), 140.3 (s), 126.0 (s), 118.3 (s), 65.4 (s), 35.5 (s), 24.8 (s), 23.7 (s), 22.1 (s), 13.7 (s). ESI-MS:  $m/z$  224.1  $[M+H]^+$ , 246.2  $[M+Na]^+$ ; HRMS (ESI) calculated for  $[M+Na, C_{12}H_{17}NNaO_3]^+$ : 246.1101; found: 246.1106.

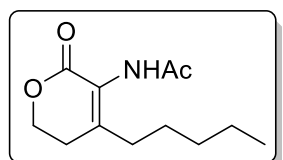

**1f:** Prepared according to procedure B as white solid in 95% yield.  $^1H$  NMR (500 MHz,  $CDCl_3$ )  $\delta$  7.22 (s, 1H), 4.38 (t,  $J = 6.2$  Hz, 2H), 2.55 (t,  $J = 6.2$  Hz, 2H), 2.24 (m, 2H), 2.11 (s, 3H), 1.45 (m, 2H), 1.32 - 1.22 (m, 5H), 0.87 (t,  $J = 7.1$  Hz, 3H).  $^{13}C$  NMR (126 MHz,  $CDCl_3$ )  $\delta$  168.6 (s), 164.2 (s), 151.4 (s), 119.8 (s), 65.5 (s), 33.4 (s), 31.7 (s), 28.0 (s), 25.7 (s), 23.5 (s), 22.4 (s), 13.9 (s). ESI-MS:  $m/z$  226.1  $[M+H]^+$ , 248.2  $[M+Na]^+$ ; HRMS (ESI) calculated for  $[M+Na, C_{12}H_{19}NNaO_3]^+$ : 248.1257; found: 248.1262.

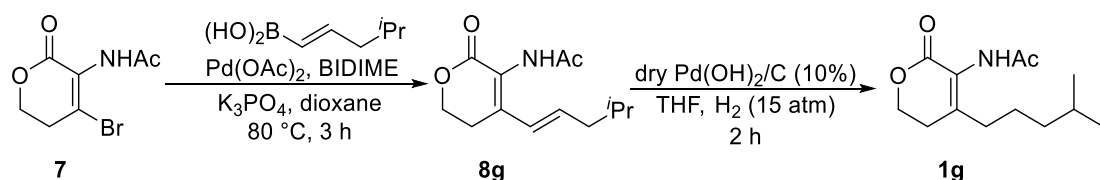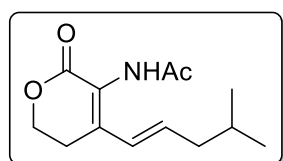

**8g:** Prepared according to procedure A as white solid in 92% yield.  $^1H$  NMR (500 MHz,  $CDCl_3$ )  $\delta$  7.32 (s, 1H), 6.22 (d,  $J = 15.9$  Hz, 1H), 6.14 (dd,  $J = 15.0, 7.7$  Hz, 1H), 4.43 (t,  $J = 6.2$  Hz, 2H), 2.71 (t,  $J = 6.1$  Hz, 2H), 2.15 (s, 3H), 2.11 (t,  $J = 6.9$



Hz, 2H), 1.70 (dt,  $J = 13.4, 6.7$  Hz, 1H), 0.90 (d,  $J = 6.6$  Hz, 6H).  $^{13}\text{C}$  NMR (126 MHz,  $\text{CDCl}_3$ )  $\delta$  168.7 (s), 164.9 (s), 141.6 (s), 139.3 (s), 126.9 (s), 118.4 (s), 65.4 (s), 42.7 (s), 28.4 (s), 24.9 (s), 23.7 (s), 22.4 (s). ESI-MS:  $m/z$  238.1  $[\text{M}+\text{H}]^+$ , 260.2  $[\text{M}+\text{Na}]^+$ ; HRMS (ESI) calculated for  $[\text{M}+\text{Na}, \text{C}_{13}\text{H}_{19}\text{NNaO}_3]^+$ : 260.1257; found: 260.1256.

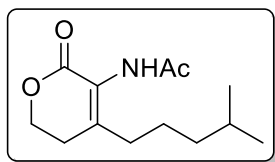

**1g**: Prepared according to procedure B as white solid in 96% yield.  $^1\text{H}$  NMR (500 MHz,  $\text{CDCl}_3$ )  $\delta$  7.12 (s, 1H), 4.39 (t,  $J = 6.1$  Hz, 2H), 2.56 (t,  $J = 6.1$  Hz, 2H), 2.23 (dd,  $J = 16.5, 8.6$  Hz, 2H), 2.12 (s, 3H), 1.52 (d,  $J = 6.7$  Hz, 1H), 1.46 (t,  $J = 7.9$  Hz, 2H), 1.18 - 1.12 (m, 2H), 0.86 (d,  $J = 6.6$  Hz, 6H).  $^{13}\text{C}$  NMR (126 MHz,  $\text{CDCl}_3$ )  $\delta$  168.4 (s), 164.2 (s), 150.9 (s), 119.8 (s), 77.1 (d,  $J = 31.9$  Hz), 76.8 (s), 65.5 (s), 38.7 (s), 33.7 (s), 28.1 (s), 27.8 (s), 23.7 (d,  $J = 24.5$  Hz), 22.5 (s). ESI-MS:  $m/z$  240.2  $[\text{M}+\text{H}]^+$ , 262.2  $[\text{M}+\text{Na}]^+$ ; HRMS (ESI) calculated for  $[\text{M}+\text{Na}, \text{C}_{13}\text{H}_{21}\text{NNaO}_3]^+$ : 262.1414; found: 262.1415.

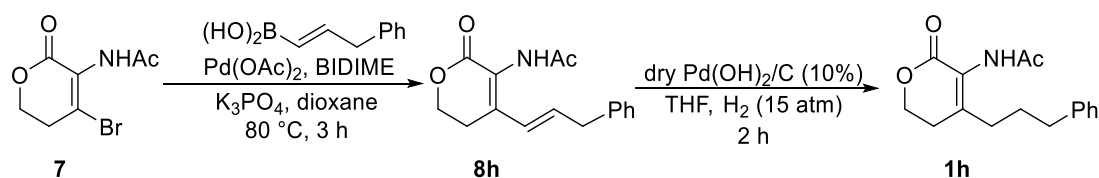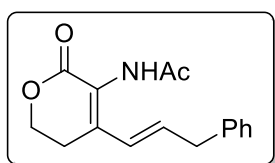

**8h**: Prepared according to procedure A as white solid in 83% yield.  $^1\text{H}$  NMR (500 MHz,  $\text{CDCl}_3$ )  $\delta$  7.31 (t,  $J = 7.4$  Hz, 3H), 7.21 (dd,  $J = 22.4, 7.3$  Hz, 3H), 6.27 (d,  $J = 12.7$  Hz, 2H), 4.42 (t,  $J = 6.2$  Hz, 2H), 3.56 (d,  $J = 6.1$  Hz, 2H), 2.70 (t,  $J = 6.2$  Hz, 2H), 2.15 (s, 3H).  $^{13}\text{C}$  NMR (126 MHz,  $\text{CDCl}_3$ )  $\delta$  168.5 (s), 164.8 (s), 140.8 (s), 138.6 (s), 138.0 (s), 128.7 (d,  $J = 16.9$  Hz), 127.0 (s), 126.5 (s), 119.0 (s), 77.3 (s), 76.9 (d,  $J = 32.0$  Hz), 76.8 - 76.4 (m), 39.7 (s), 24.9 (s), 23.7 (s). ESI-MS:  $m/z$  272.2  $[\text{M}+\text{H}]^+$ , 294.2  $[\text{M}+\text{Na}]^+$ ; HRMS (ESI) calculated for  $[\text{M}+\text{Na}, \text{C}_{16}\text{H}_{17}\text{NNaO}_3]^+$ : 294.1101; found: 294.1105.

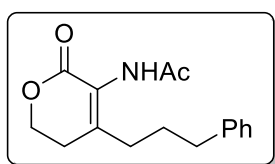

**1h**: Prepared according to procedure B as white solid in 98% yield.  $^1\text{H}$  NMR (500 MHz,  $\text{CDCl}_3$ )  $\delta$  7.35 (dd,  $J = 10.2, 4.8$  Hz, 2H), 7.32 - 7.17 (m, 4H), 4.44 (t,  $J = 6.1$  Hz, 2H), 2.68 (t,  $J = 7.5$  Hz, 2H), 2.60 (t,  $J = 6.1$  Hz, 2H), 2.40 - 2.32 (m, 2H), 2.13 (s, 3H), 1.91 - 1.84 (m, 2H).  $^{13}\text{C}$  NMR (126 MHz,  $\text{CDCl}_3$ )  $\delta$  168.6 (s), 164.0 (s), 150.8 (s), 141.3 (s), 128.4 (s), 128.4 (s), 126.1 (s), 120.2 (s), 77.3 (s), 77.1 (s), 76.8 (s), 65.4 (s), 35.6 (s), 32.9 (s), 28.0 (s), 27.6 (s), 23.4 (s). ESI-MS:  $m/z$  274.2  $[\text{M}+\text{H}]^+$ , 296.2  $[\text{M}+\text{Na}]^+$ ; HRMS (ESI) calculated for  $[\text{M}+\text{Na}, \text{C}_{16}\text{H}_{19}\text{NNaO}_3]^+$ : 296.1257; found: 296.1260.

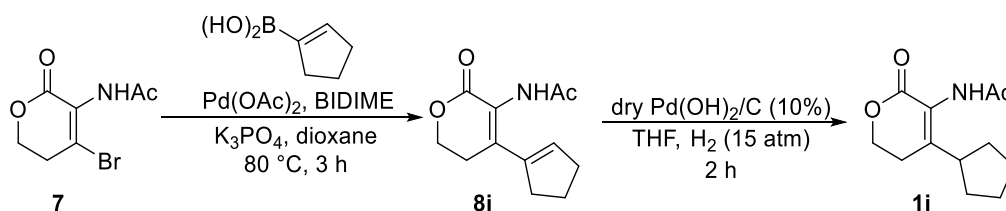

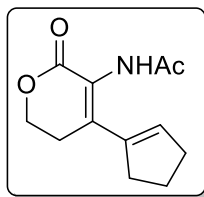

**8i:** Prepared according to procedure A as white solid in 72% yield.  $^1\text{H}$  NMR (500 MHz,  $\text{CDCl}_3$ )  $\delta$  7.16 (s, 1H), 6.29 (s, 1H), 4.42 (t,  $J = 6.1$  Hz, 2H), 2.77 (t,  $J = 6.0$  Hz, 2H), 2.52 (t,  $J = 6.4$  Hz, 2H), 2.44 (s, 2H), 2.11 (s, 3H), 1.94 - 1.87 (m, 2H).  $^{13}\text{C}$  NMR (126 MHz,  $\text{CDCl}_3$ )  $\delta$  169.2 (s), 165.4 (s), 142.0 (s), 140.6 (s), 139.3 (s), 118.3 (s), 65.4 (s), 32.8 (d,  $J = 2.5$  Hz), 28.4 (s), 23.9 (s), 23.7 (s). ESI-MS:  $m/z$  222.1  $[\text{M}+\text{H}]^+$ , 244.1  $[\text{M}+\text{Na}]^+$ ; HRMS (ESI) calculated for  $[\text{M}+\text{Na}, \text{C}_{12}\text{H}_{15}\text{NNaO}_3]^+$ : 244.0944; found: 244.0947. bp 186-189 °C

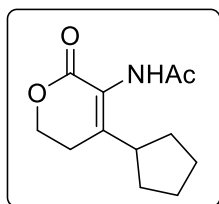

**1i:** Prepared according to procedure B as white solid in 96% yield.  $^1\text{H}$  NMR (500 MHz,  $\text{CDCl}_3$ )  $\delta$  7.08 (s, 1H), 4.39 (t,  $J = 6.1$  Hz, 2H), 2.96 - 2.85 (m, 1H), 2.52 (t,  $J = 6.1$  Hz, 2H), 2.11 (s, 3H), 1.95 - 1.87 (m, 2H), 1.73 - 1.66 (m, 2H), 1.63 (m, 2H), 1.39 (d,  $J = 2.4$  Hz, 2H).  $^{13}\text{C}$  NMR (126 MHz,  $\text{CDCl}_3$ )  $\delta$  169.1 (s), 164.1 (s), 155.2 (s), 119.4 (s), 65.7 (s), 42.3 (s), 30.4 (s), 26.0 (s), 24.4 (s), 23.6 (s). ESI-MS:  $m/z$  246.2  $[\text{M}+\text{Na}]^+$ ; HRMS (ESI) calculated for  $[\text{M}+\text{Na}, \text{C}_{12}\text{H}_{17}\text{NNaO}_3]^+$ : 246.1101; found: 246.1104.

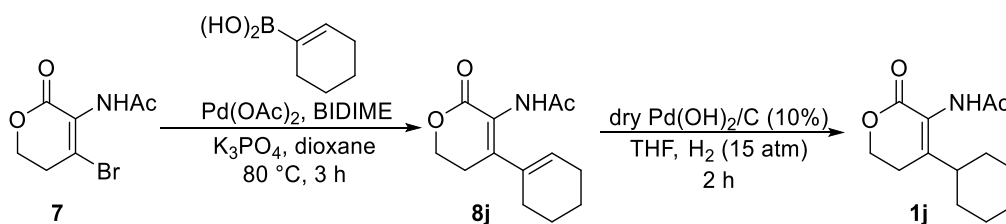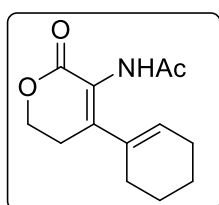

**8j:** Prepared according to procedure A as white solid in 92% yield.  $^1\text{H}$  NMR (500 MHz,  $\text{CDCl}_3$ )  $\delta$  7.12 (s, 1H), 5.90 (s, 1H), 4.40 (t,  $J = 6.1$  Hz, 2H), 2.64 (t,  $J = 6.0$  Hz, 2H), 2.12 (d,  $J = 5.8$  Hz, 4H), 2.06 (s, 3H), 1.68 - 1.62 (m, 2H), 1.62 - 1.57 (m, 2H).  $^{13}\text{C}$  NMR (126 MHz,  $\text{CDCl}_3$ )  $\delta$  169.0 (s), 164.9 (s), 147.7 (s), 135.2 (s), 129.8 (s), 118.1 (s), 65.5 (s), 28.3 (s), 26.1 (s), 25.7 (s), 23.6 (s), 22.6 (s), 21.6 (s). ESI-MS:  $m/z$  236.1  $[\text{M}+\text{H}]^+$ , 258.2  $[\text{M}+\text{Na}]^+$ ; HRMS (ESI) calculated for  $[\text{M}+\text{Na}, \text{C}_{10}\text{H}_{14}\text{NNaO}_3]^+$ : 258.1101; found: 258.1106. bp 155-157 °C

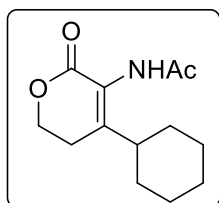

**1j:** Prepared according to procedure B as white solid in 95% yield.  $^1\text{H}$  NMR (500 MHz,  $\text{CDCl}_3$ )  $\delta$  7.03 (s, 1H), 4.37 (t,  $J = 6.1$  Hz, 2H), 2.51 (t,  $J = 6.1$  Hz, 2H), 2.46 (t,  $J = 11.7$  Hz, 1H), 2.12 (s, 3H), 1.82 - 1.74 (m, 4H), 1.34 - 1.10 (m, 6H).  $^{13}\text{C}$  NMR (126 MHz,  $\text{CDCl}_3$ )  $\delta$  169.2 (s), 164.3 (s), 156.1 (s), 118.7 (s), 65.6 (s), 41.4 (s), 29.5 (s), 25.9 (s), 25.9 (s), 24.5 (s), 23.5 (s). ESI-MS:  $m/z$  238.1  $[\text{M}+\text{H}]^+$ , 260.2  $[\text{M}+\text{Na}]^+$ ; HRMS (ESI) calculated for  $[\text{M}+\text{H}, \text{C}_{13}\text{H}_{20}\text{NO}_3]^+$ : 238.1438; found: 238.1436.

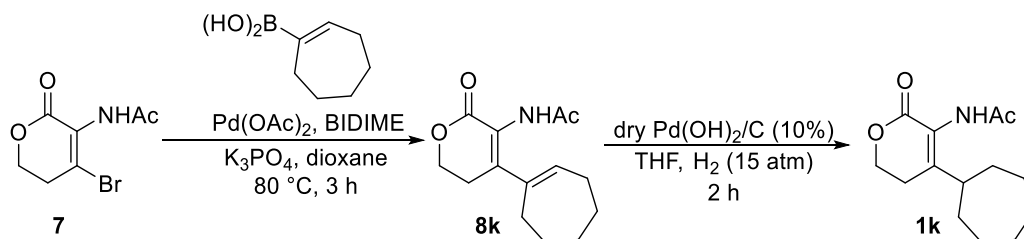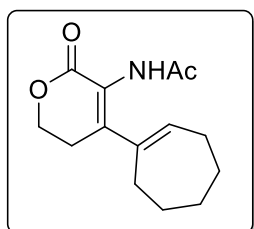

**8k:** Prepared according to procedure A as white solid in 82% yield.  $^1\text{H}$  NMR (500 MHz,  $\text{CDCl}_3$ )  $\delta$  7.15 (s, 1H), 6.00 (t,  $J = 6.4$  Hz, 1H), 4.38 (t,  $J = 6.1$  Hz, 2H), 2.63 (t,  $J = 6.0$  Hz, 2H), 2.33 - 2.28 (m, 2H), 2.20 (dd,  $J = 10.6, 6.3$  Hz, 2H), 2.04 (s, 3H), 1.74 (dt,  $J = 11.7, 5.9$  Hz, 2H), 1.56 - 1.45 (m, 4H).  $^{13}\text{C}$  NMR (126 MHz,  $\text{CDCl}_3$ )  $\delta$  167.9 (s), 164.6 (s), 150.1 (s), 141.9 (s), 134.3 (s), 117.8 (s), 65.6 (s), 32.2 (s), 30.7 (s), 29.1 (s), 29.0 (s), 27.0 (s), 26.4 (s), 23.6 (s). ESI-MS:  $m/z$  250.1  $[\text{M}+\text{H}]^+$ , 272.2  $[\text{M}+\text{Na}]^+$ ; HRMS (ESI) calculated for  $[\text{M}+\text{H}, \text{C}_{14}\text{H}_{19}\text{NO}_3]^+$ : 272.1257; found: 272.1264.

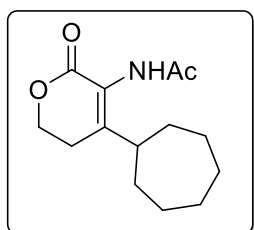

**1k:** Prepared according to procedure B as white solid in 98% yield.  $^1\text{H}$  NMR (500 MHz,  $\text{CDCl}_3$ )  $\delta$  6.99 (s, 1H), 4.36 (t,  $J = 6.1$  Hz, 2H), 2.60 (t,  $J = 10.2$  Hz, 1H), 2.53 (t,  $J = 6.1$  Hz, 2H), 2.12 (s, 3H), 1.79 - 1.73 (m, 4H), 1.61 (d,  $J = 6.0$  Hz, 2H), 1.55 - 1.45 (m, 4H), 1.42 (dd,  $J = 19.9, 8.6$  Hz, 2H).  $^{13}\text{C}$  NMR (126 MHz,  $\text{CDCl}_3$ )  $\delta$  169.1 (s), 164.4 (s), 157.3 (s), 117.4 (s), 77.1 (d,  $J = 32.0$  Hz), 76.8 (s), 76.8 (s), 65.7 (s), 42.3 (s), 32.0 (s), 27.8 (s), 27.6 (s), 24.4 (s), 23.5 (s). ESI-MS:  $m/z$  252.1  $[\text{M}+\text{H}]^+$ , 274.2  $[\text{M}+\text{Na}]^+$ ; HRMS (ESI) calculated for  $[\text{M}+\text{Na}, \text{C}_{14}\text{H}_{21}\text{NNaO}_3]^+$ : 274.1414; found: 274.1416.

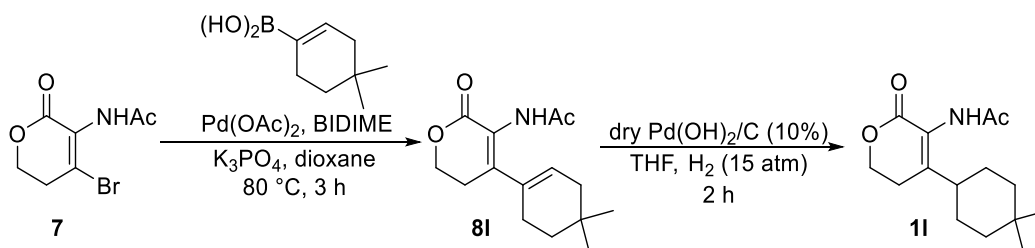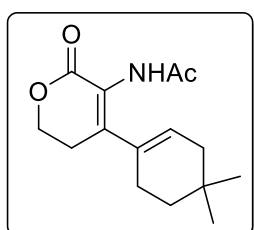

**8l:** Prepared according to procedure A as white solid in 76% yield.  $^1\text{H}$  NMR (500 MHz,  $\text{CDCl}_3$ )  $\delta$  7.18 (s, 1H), 5.83 (s, 1H), 4.40 (t,  $J = 6.1$  Hz, 2H), 2.64 (t,  $J = 6.0$  Hz, 2H), 2.15 (s, 2H), 2.04 (s, 3H), 1.90 (s, 2H), 1.40 (t,  $J = 6.3$  Hz, 2H), 0.91 (s, 6H).  $^{13}\text{C}$  NMR (126 MHz,  $\text{CDCl}_3$ )  $\delta$  168.1 (s), 164.9 (s), 148.1 (s), 133.9 (s), 129.0 (s), 118.3 (s), 65.5 (s), 39.6 (s), 35.3 (s), 28.5 (s), 28.2 (s), 28.1 (s), 23.5 (s). ESI-MS: 264.3  $[\text{M}+\text{H}]^+$ , 286.3  $[\text{M}+\text{Na}]^+$ ; HRMS (ESI) calculated for  $[\text{M}+\text{Na}, \text{C}_{15}\text{H}_{21}\text{NNaO}_3]^+$ : 286.1414; found: 286.1419.

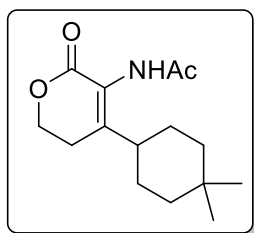

**1l:** Prepared according to procedure B as white solid in 92% yield.  $^1\text{H}$  NMR (500 MHz,  $\text{CDCl}_3$ )  $\delta$  6.42 (s, 1H), 4.76 (m, 1H), 4.44 - 4.26 (m, 2H), 2.85 (m, 1H), 2.09 (s, 3H), 2.04 - 1.95 (m, 1H), 1.88 (m, 1H), 1.45 - 1.32 (m, 5H), 1.18 (m, 2H), 1.07 (m, 2H), 0.87 (s, 3H), 0.82 (s, 3H).  $^{13}\text{C}$  NMR (126 MHz,  $\text{CDCl}_3$ )  $\delta$  173.7 (s), 170.1 (s), 65.8 (s), 50.5 (s), 39.1 (s), 38.6 (s), 37.4 (s), 36.6 (s), 32.9 (s), 29.8 (s), 26.1 (s), 23.8 (s), 23.1 (s), 21.3 (s). ESI-MS:  $m/z$  266.3  $[\text{M}+\text{H}]^+$ , 288.4  $[\text{M}+\text{Na}]^+$ ; HRMS (ESI) calculated for  $[\text{M}+\text{Na}, \text{C}_{15}\text{H}_{23}\text{NNaO}_3]^+$ : 288.1570; found: 288.1574.

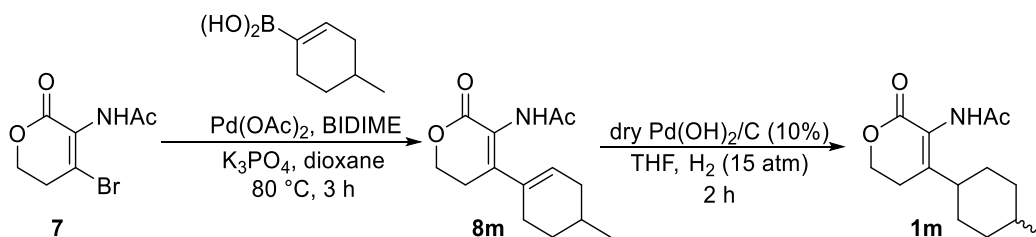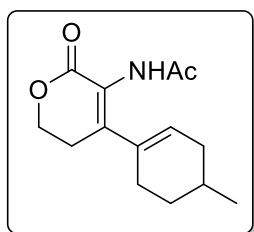

**8m:** Prepared according to procedure A as white solid in 86% yield.  $^1\text{H}$  NMR (500 MHz,  $\text{CDCl}_3$ )  $\delta$  7.24 (s, 1H), 5.86 (s, 1H), 4.42-4.34 (m, 2H), 2.60-2.65 (m, 2H), 2.08-2.25 (m, 3H), 2.03 (s, 3H), 1.76-1.59 (m, 3H), 1.23 (m, 1H), 0.93 (d,  $J = 6.5$  Hz, 3H).  $^{13}\text{C}$  NMR (126 MHz,  $\text{CDCl}_3$ )  $\delta$  168.1 (s), 164.8 (s), 148.0 (s), 134.8 (s), 129.5 (s), 118.3 (s), 65.5 (s), 34.1 (s), 30.7 (s), 28.4 (s), 27.7 (s), 26.0 (s), 23.5 (s), 21.5 (s). ESI-MS: 272.3  $[\text{M}+\text{Na}]^+$ ; HRMS (ESI) calculated for  $[\text{M}+\text{Na}, \text{C}_{14}\text{H}_{19}\text{NNaO}_3]^+$ : 272.157; found: 272.1262.

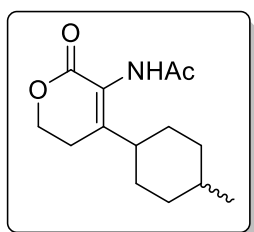

**1m:** Prepared according to procedure B as white solid in 98% yield.  $^1\text{H}$  NMR (500 MHz,  $\text{CDCl}_3$ )  $\delta$  7.00 (s, 1H), 4.37 (m, 2H), 2.55 (m, 2H), 2.42 (m, 1H), 2.12 (s, 3H), 1.80 - 1.66 (m, 3H), 1.50 (m, 2H), 1.26 (m, 1H), 0.93 (m, 4H).  $^{13}\text{C}$  NMR (126 MHz,  $\text{CDCl}_3$ )  $\delta$  169.15 (s), 164.21 (s), 156.19 (s), 119.0 (s), 118.8 (s), 65.6 (s), 41.6 (s), 41.0 (s), 34.5 (s), 32.2 (s), 31.1 (s), 29.4 (s), 26.3 (s), 24.7 (s), 24.5 (s), 23.5 (s), 23.4 (s), 22.5 (s), 17.4 (s). ESI-MS: 274.1  $[\text{M}+\text{Na}]^+$ ; HRMS (ESI) calculated for  $[\text{M}+\text{Na}, \text{C}_{14}\text{H}_{21}\text{NNaO}_3]^+$ : 274.1414; found: 274.1417.

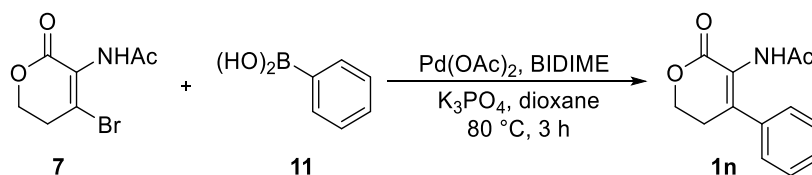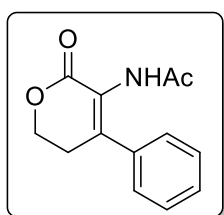

**1n:** Prepared according to procedure A with **11** (2 equiv) as white solid in 99% yield.  $^1\text{H}$  NMR (500 MHz,  $\text{CDCl}_3$ )  $\delta$  7.51 - 7.28 (m, 5H), 7.10 (s, 1H), 4.56 (t,  $J = 6.1$  Hz, 2H), 2.92 (t,  $J = 6.1$  Hz, 2H), 1.95 (s, 3H).  $^{13}\text{C}$  NMR (126 MHz,  $\text{CDCl}_3$ )  $\delta$  167.9 (s), 164.2 (s), 145.5 (s), 137.0 (s), 129.3 (s), 128.6 (s), 126.8 (s), 120.3 (s), 65.6

(s), 30.1 (s), 23.3 (s). ESI-MS:  $m/z$  232.1  $[M+H]^+$ , 254.1  $[M+Na]^+$ ; HRMS (ESI) calculated for  $[M+Na, C_{13}H_{13}NNaO_3]^+$ : 254.0788; found: 254.0788.

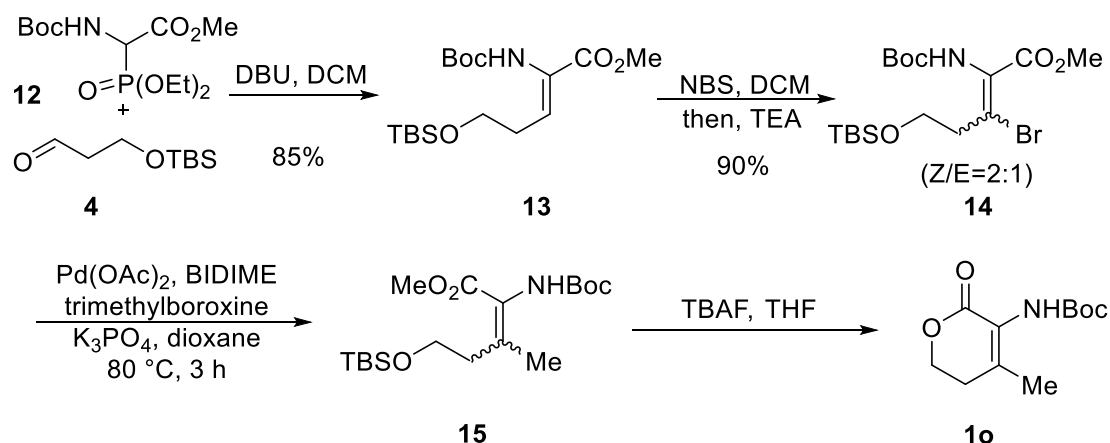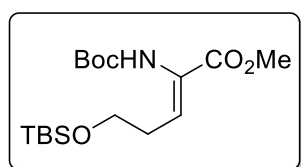

**13:** To a 150 mL Schlenk tube equipped with a mechanical stirrer was charged with compound **12** (1 equiv), dry DCM (30 mL), under  $N_2$  atmosphere. By slowly adding DBU (2.1 equiv) in DCM via syringe at 0 °C, then the mixture was allowed to react at room temperature for ten minutes. Place the system at 0 °C and slowly drop 3-tert-butyldimethylsilyloxypropionaldehyde **4** (1.5 equiv) in DCM for 5 minutes. Then the reaction was kept at 0 °C for 10 minutes with TLC monitored (even room temperature or long reaction time will lead to increase of  $\beta$ -elimination by-products). DBU was washed with water, and the mixture was extracted with water (20 mL) and DCM (10 mL x 3), washed with saturated brine, dried over anhydrous sodium sulfate, concentrated, and column chromatography (PE:EA=5:1) to obtain desired product as white solid in 83% yield.  $^1H$  NMR (500 MHz,  $CDCl_3$ )  $\delta$  6.55 (s, 1H), 6.44 (s, 1H), 3.75 (s, 3H), 3.70 (t,  $J = 6.0$  Hz, 2H), 2.39 (dd,  $J = 13.0, 6.0$  Hz, 2H), 1.43 (s, 9H), 0.87 (s, 9H), 0.04 (s, 6H).  $^{13}C$  NMR (126 MHz,  $CDCl_3$ )  $\delta$  165.3 (s), 153.2 (s), 130.8 (s), 128.4 (s), 80.30 (s), 62.20 (s), 52.15 (s), 31.34 (s), 28.15 (s), 25.86 (s), 18.24 (s), -5.45 (s). ESI-MS:  $m/z$  382.2  $[M+Na]^+$ ; HRMS (ESI) calculated for  $[M+Na, C_{17}H_{33}NNaO_5Si]^+$ : 382.2020; found: 382.2021.

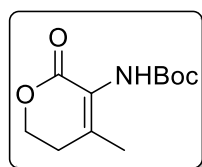

**1o:** To a 150 mL Schlenk tube equipped with a mechanical stirrer was charged with compound (*E*)-**15** (1 equiv), dry THF (30 mL), TBAF (2 equiv) in THF solution under  $N_2$  atmosphere. The mixture was kept at room temperature overnight. The solution was concentrated and purified by column chromatography (PE:EA=1:1) to afford desired product as white solid in 83% yield.  $^1H$  NMR (500 MHz,  $CDCl_3$ )  $\delta$  6.36 (s, 1H), 4.35 (t,  $J = 6.2$  Hz, 2H), 2.52 (t,  $J = 6.2$  Hz, 2H), 1.91 (s, 3H), 1.44 (s, 9H).  $^{13}C$  NMR (126 MHz,  $CDCl_3$ )  $\delta$  164.0 (s), 153.0 (s), 144.9 (s), 121.0 (s), 80.5 (s), 65.3 (s), 30.3 (s), 28.1 (s), 19.9 (s). ESI-MS:  $m/z$  250.2  $[M+Na]^+$ ; HRMS (ESI) calculated for  $[M+Na, C_{11}H_{17}NNaO_4]^+$ : 250.1050; found: 250.1054.

#### 4. General procedures for asymmetric hydrogenation

To a 4-mL vial equipped with a magnetic stirring bar was charged cyclic dehydroamino acid derivative (0.1 mmol), [Rh(L1)(cod)]BF<sub>4</sub> (1 mol %) and dry THF (0.5 mL) in glove box. After stirred for 5 min at room temperature, the reaction mixture was transferred to an autoclave. The autoclave was purged with hydrogen three times and charged to 1000 psi. The mixture was stirred at 60 °C for 3 h, and depressurized carefully in a well-ventilated hood. A crude reaction sample was passed through celite to remove metal precipitate and directly analyzed by chiral HPLC to determine the conversions and ee values. The hydrogenation products were isolated in quantitative yields.

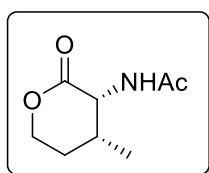

**2a:** Prepared according to general procedure for asymmetric hydrogenation as white solid in 99% yield. <sup>1</sup>H NMR (500 MHz, CDCl<sub>3</sub>) δ 6.39 (s, 1H), 4.79 (t, *J* = 6.5 Hz, 1H), 4.41 - 4.34 (m, 2H), 2.93 - 2.84 (m, 1H), 2.31 (m, 1H), 2.07 (s, 3H), 1.72 - 1.63 (m, 1H), 0.91 (d, *J* = 7.1 Hz, 3H). <sup>13</sup>C NMR (126 MHz, CDCl<sub>3</sub>) δ 172.2 (s), 170.0 (s), 65.9 (s), 52.4 (s), 29.3 (s), 28.0 (s), 23.0 (s), 16.8 (s). ESI-MS: *m/z* 172.00 [M+H]<sup>+</sup>; HRMS (ESI) calculated for [M+H, C<sub>8</sub>H<sub>14</sub>NO<sub>3</sub>]<sup>+</sup>: 172.0968; found: 172.0960. 90% ee. Chiral HPLC conditions: OJ-3, *i*-PrOH-hexane 20/80, flow rate 0.7 mL/min, 210 nm. *t*<sub>1</sub> = 11.47 min (major), *t*<sub>2</sub> = 13.05 min. T = 20 min. [α]<sub>D</sub><sup>25</sup> -103.6 (c 0.13, CHCl<sub>3</sub>).

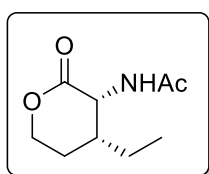

**2b:** Prepared according to general procedure for asymmetric hydrogenation as white solid in 99% yield. <sup>1</sup>H NMR (500 MHz, CDCl<sub>3</sub>) δ 6.52 (s, 1H), 4.86 - 4.76 (m, 1H), 4.39 - 4.31 (m, 2H), 2.58 (m, 1H), 2.21 - 2.12 (m, 1H), 2.04 (s, 3H), 1.78 - 1.69 (m, 1H), 1.57 - 1.49 (m, 1H), 0.91 (m, 1H), 0.87 (m, 3H). <sup>13</sup>C NMR (126 MHz, CDCl<sub>3</sub>) δ 172.5 (s), 170.0 (s), 77.3 (s), 52.0 (s), 34.4 (s), 26.3 (s), 23.2 (s), 23.0 (s), 10.8 (s). ESI-MS: *m/z* 208.1 [M+Na]<sup>+</sup>; HRMS (ESI) calculated for [M+Na, C<sub>10</sub>H<sub>19</sub>NNaO<sub>4</sub>]<sup>+</sup>: 240.1206; found: 240.1214. 92% ee. Chiral HPLC conditions: OJ-3, *i*-PrOH-hexane 20/80, flow rate 0.7 mL/min, 210 nm. *t*<sub>1</sub> = 10.05 min (major), *t*<sub>2</sub> = 11.37 min. T = 20 min. [α]<sub>D</sub><sup>25</sup> -30.9 (c 0.10, CHCl<sub>3</sub>).

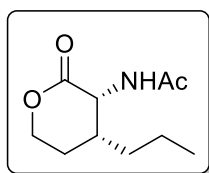

**2c:** Prepared according to general procedure for asymmetric hydrogenation as white solid in 99% yield. <sup>1</sup>H NMR (500 MHz, CDCl<sub>3</sub>) δ 6.39 (s, 1H), 4.83 - 4.77 (m, 1H), 4.42 - 4.33 (m, 2H), 2.70 (m, 1H), 2.19 (m, 1H), 2.07 (s, 3H), 1.76 (m, 1H), 1.41 (m, 2H), 1.21 (m, 1H), 0.89 (m, 5H). <sup>13</sup>C NMR (126 MHz, CDCl<sub>3</sub>) δ 172.4 (s), 169.9 (s), 66.0 (s), 52.0 (s), 32.7 (s), 32.5 (s), 26.7 (s), 23.1 (s), 19.5 (s), 14.0 (s). ESI-MS: *m/z* 200.2 [M+H]<sup>+</sup>, 222.1 [M+Na]<sup>+</sup>; HRMS (ESI) calculated for [M+Na, C<sub>11</sub>H<sub>21</sub>NNaO<sub>4</sub>]<sup>+</sup>: 254.1363; found: 254.1370. 90% ee. Chiral HPLC conditions: OJ-3, *i*-PrOH-hexane 20/80, flow rate 0.7 mL/min, 210 nm. *t*<sub>1</sub> = 9.32 min (major), *t*<sub>2</sub> = 10.62 min. T = 20 min. [α]<sub>D</sub><sup>25</sup> -117.7 (c 0.25, CHCl<sub>3</sub>).

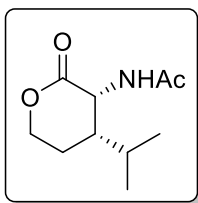

**2d:** Prepared according to general procedure for asymmetric hydrogenation as white solid in 99% yield.  $^1\text{H}$  NMR (500 MHz,  $\text{CDCl}_3$ )  $\delta$  6.44 (m, 1H), 4.76 (m, 1H), 4.39 (m, 1H), 4.32 (m, 1H), 2.95 - 2.82 (m, 1H), 2.08 (s, 3H), 1.93 (m, 1H), 1.80 (m, 1H), 0.94 - 0.88 (m, 1H), 0.86 (d,  $J = 7.0$  Hz, 3H), 0.70 (d,  $J = 7.0$  Hz, 3H).  $^{13}\text{C}$  NMR (126 MHz,  $\text{CDCl}_3$ )  $\delta$  173.5 (s), 170.1 (s), 65.7 (s), 50.7 (s), 37.1 (s), 26.7 (s), 23.0 (s), 21.6 (s), 20.6 (s), 15.3 (s). ESI-MS:  $m/z$  200.1  $[\text{M}+\text{H}]^+$ , 222.1  $[\text{M}+\text{Na}]^+$ ; HRMS (ESI) calculated for  $[\text{M}+\text{Na}, \text{C}_{10}\text{H}_{17}\text{NNaO}_3]^+$ : 222.1101; found: 222.1102. 90% ee. Chiral HPLC conditions: OJ-3, *i*-PrOH-hexane 20/80, flow rate 0.7 mL/min, 210 nm.  $t_1 = 9.03$  min (major),  $t_2 = 10.57$  min.  $T = 20$  min.  $[\alpha]_{\text{D}}^{25} - 25.3$  (c 0.24,  $\text{CHCl}_3$ ).

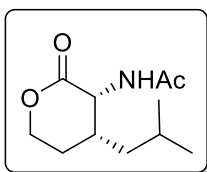

**2e:** Prepared according to general procedure for asymmetric hydrogenation as white solid in 99% yield.  $^1\text{H}$  NMR (500 MHz,  $\text{CDCl}_3$ )  $\delta$  6.40 (s, 1H), 4.84 (m,  $J = 6.5$  Hz, 1H), 4.46 - 4.36 (m, 2H), 2.85 - 2.76 (m, 1H), 2.22 (m, 1H), 2.09 (s, 3H), 1.78 (m, 1H), 1.19 (m, 1H), 1.00 - 0.95 (m, 1H), 0.93 (s, 3H), 0.85 (s, 3H).  $^{13}\text{C}$  NMR (126 MHz,  $\text{CDCl}_3$ )  $\delta$  172.4 (s), 169.8 (s), 66.0 (s), 52.0 (s), 39.4 (s), 30.8 (s), 26.8 (s), 24.8 (s), 24.0 (s), 23.1 (s), 20.8 (s). ESI-MS:  $m/z$  214.1  $[\text{M}+\text{H}]^+$ , 236.1  $[\text{M}+\text{Na}]^+$ ; HRMS (ESI) calculated for  $[\text{M}+\text{H}, \text{C}_{11}\text{H}_{20}\text{NO}_3]^+$ : 214.1438; found: 214.1440. 92% ee. Chiral HPLC conditions: OJ-3, *i*-PrOH-hexane 20/80, flow rate 0.7 mL/min, 210 nm.  $t_1 = 8.18$  min (major),  $t_2 = 9.15$  min.  $T = 20$  min.  $[\alpha]_{\text{D}}^{25} - 178.1$  (c 0.40,  $\text{CHCl}_3$ ).

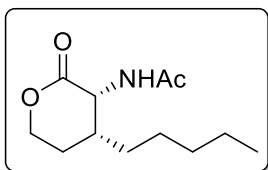

**2f:** Prepared according to general procedure for asymmetric hydrogenation as white solid in 99% yield.  $^1\text{H}$  NMR (500 MHz,  $\text{CDCl}_3$ )  $\delta$  6.44 (d,  $J = 5.2$  Hz, 1H), 4.82 - 4.77 (m, 1H), 4.37 (m, 2H), 2.66 (m, 1H), 2.21 - 2.14 (m, 1H), 2.06 (s, 3H), 1.76 (m, 1H), 1.43 (m, 1H), 1.26 (m, 6H), 0.86 (m, 4H).  $^{13}\text{C}$  NMR (126 MHz,  $\text{CDCl}_3$ )  $\delta$  172.4 (s), 169.9 (s), 66.0 (s), 52.0 (s), 32.9 (s), 31.7 (s), 30.3 (s), 26.8 (s), 26.0 (s), 23.0 (s), 22.5 (s), 13.9 (s). ESI-MS:  $m/z$  228.2  $[\text{M}+\text{H}]^+$ , 250.1  $[\text{M}+\text{Na}]^+$ ; HRMS (ESI) calculated for  $[\text{M}+\text{Na}, \text{C}_{12}\text{H}_{21}\text{NNaO}_3]^+$ : 250.1414; found: 250.1416. 92% ee. Chiral HPLC conditions: OJ-3, *i*-PrOH-hexane 20/80, flow rate 0.7 mL/min, 210 nm.  $t_1 = 8.00$  min (major),  $t_2 = 9.82$  min.  $T = 20$  min.  $[\alpha]_{\text{D}}^{25} - 106.7$  (c 0.42,  $\text{CHCl}_3$ ).

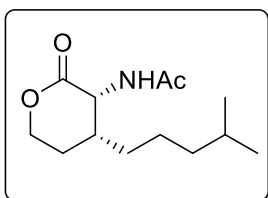

**2g:** Prepared according to general procedure for asymmetric hydrogenation as white solid in 99% yield.  $^1\text{H}$  NMR (500 MHz,  $\text{CDCl}_3$ )  $\delta$  6.39 (s, 1H), 4.79 (t,  $J = 6.6$  Hz, 1H), 4.38 (m, 2H), 2.69 (m, 1H), 2.23 - 2.16 (m, 1H), 2.07 (s, 3H), 1.81 - 1.71 (m, 1H), 1.54 - 1.46 (m, 1H), 1.41 (m, 1H), 1.34 (m, 1H), 1.14 (m, 4H), 0.85 (m, 6H).  $^{13}\text{C}$  NMR (126 MHz,  $\text{CDCl}_3$ )  $\delta$  172.4 (s), 169.9 (s), 66.0 (s), 52.1 (s), 38.8 (s), 32.9 (s), 30.6 (s), 27.8 (s), 26.8 (s), 24.1 (s), 23.1 (s), 22.7 (s), 22.4 (s). ESI-MS:  $m/z$  242.1  $[\text{M}+\text{H}]^+$ , 264.4  $[\text{M}+\text{Na}]^+$ ; HRMS (ESI) calculated for  $[\text{M}+\text{MeOH}, \text{C}_{14}\text{H}_{27}\text{NNaO}_4]^+$ : 296.1832; found: 296.1839. 91% ee. Chiral HPLC conditions: OJ-3, *i*-PrOH-hexane 20/80, flow rate 0.7 mL/min, 210 nm.  $t_1 = 7.47$  min (major),  $t_2 = 8.56$  min.  $T = 20$  min.  $[\alpha]_{\text{D}}^{25} - 89.7$  (c 0.25,  $\text{CHCl}_3$ ).

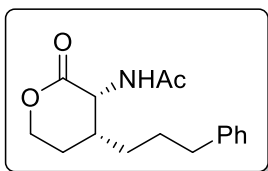

**2h:** Prepared according to general procedure for asymmetric hydrogenation as white solid in 99% yield.  $^1\text{H}$  NMR (500 MHz,  $\text{CDCl}_3$ )  $\delta$  7.29 - 7.24 (m, 2H), 7.16 (m, 3H), 6.38 (d,  $J = 5.3$  Hz, 1H), 4.79 (t,  $J = 6.6$  Hz, 1H), 4.37 - 4.33 (m, 2H), 2.78 - 2.69 (m, 1H), 2.62 (m, 1H), 2.53 (m, 1H), 2.19 (m, 1H), 2.02 (s, 3H), 1.72 (m, 2H), 1.65 (m, 1H), 1.51 (m, 2H), 1.00 - 0.90 (m, 1H).  $^{13}\text{C}$  NMR (126 MHz,  $\text{CDCl}_3$ )  $\delta$  172.3 (s), 169.9 (s), 141.7 (s), 128.4 (s), 128.3 (s), 125.9 (s), 66.0 (s), 51.9 (s), 35.5 (s), 32.6 (s), 29.7 (s), 28.1 (s), 26.8 (s), 23.0 (s). ESI-MS:  $m/z$  276.3  $[\text{M}+\text{H}]^+$ , 298.3  $[\text{M}+\text{Na}]^+$ ; HRMS (ESI) calculated for  $[\text{M}+\text{Na}, \text{C}_{17}\text{H}_{25}\text{NNaO}_4]^+$ : 330.1676; found: 330.1677. 70% ee. Chiral HPLC conditions: OJ-3, *i*-PrOH-hexane 20/80, flow rate 0.7 mL/min, 210 nm.  $t_1 = 14.00$  min (major),  $t_2 = 17.89$  min. T = 20 min.  $[\alpha]_{\text{D}}^{25} -140.1$  (c 0.28,  $\text{CHCl}_3$ ).

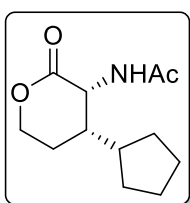

**2i:** Prepared according to general procedure for asymmetric hydrogenation as white solid in 99% yield.  $^1\text{H}$  NMR (500 MHz,  $\text{CDCl}_3$ )  $\delta$  6.49 (s, 1H), 4.80 (dd,  $J = 7.9, 6.2$  Hz, 1H), 4.36 (m, 2H), 2.89 (m, 1H), 2.13 - 2.06 (m, 1H), 2.05 (s, 3H), 1.82 (m, 2H), 1.69 (m, 1H), 1.59 - 1.44 (m, 5H), 1.14 (m, 2H).  $^{13}\text{C}$  NMR (126 MHz,  $\text{CDCl}_3$ )  $\delta$  173.1 (s), 170.1 (s), 66.0 (s), 51.9 (s), 40.1 (s), 35.8 (s), 30.6 (s), 27.2 (s), 25.2 (s), 25.2 (s), 24.1 (s), 23.0 (s). ESI-MS:  $m/z$  226.1  $[\text{M}+\text{H}]^+$ , 248.1  $[\text{M}+\text{Na}]^+$ ; HRMS (ESI) calculated for  $[\text{M}+\text{Na}, \text{C}_{12}\text{H}_{19}\text{NNaO}_3]^+$ : 248.1257; found: 248.1260. 93% ee. Chiral HPLC conditions: OJ-3, *i*-PrOH-hexane 20/80, flow rate 0.7 mL/min, 210 nm.  $t_1 = 9.52$  min (major),  $t_2 = 11.14$  min. T = 20 min.  $[\alpha]_{\text{D}}^{25} -87.4$  (c 0.15,  $\text{CHCl}_3$ ).

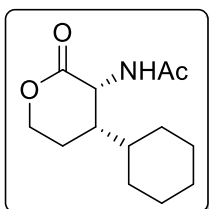

**2j:** Prepared according to general procedure for asymmetric hydrogenation as white solid in 99% yield.  $^1\text{H}$  NMR (500 MHz,  $\text{CDCl}_3$ )  $\delta$  6.44 (d,  $J = 4.5$  Hz, 1H), 4.76 (m, 1H), 4.38 (m, 1H), 4.33 - 4.26 (m, 1H), 2.80 (m, 1H), 2.09 (s, 3H), 1.94 (m, 1H), 1.86 (m, 1H), 1.71 (m, 2H), 1.67 - 1.61 (m, 1H), 1.52 - 1.39 (m, 2H), 1.24 (m, 2H), 1.14 (m, 2H), 1.07 - 1.00 (m, 2H).  $^{13}\text{C}$  NMR (126 MHz,  $\text{CDCl}_3$ )  $\delta$  173.7 (s), 170.1 (s), 65.8 (s), 50.4 (s), 37.4 (s), 37.0 (s), 30.6 (s), 26.5 (s), 26.2 (s), 26.0 (s), 25.7 (s), 23.0 (s), 22.9 (s). ESI-MS:  $m/z$  240.1  $[\text{M}+\text{H}]^+$ , 262.1  $[\text{M}+\text{Na}]^+$ ; HRMS (ESI) calculated for  $[\text{M}+\text{H}, \text{C}_{13}\text{H}_{22}\text{NO}_3]^+$ : 240.1594; found: 240.1601. 94% ee. Chiral HPLC conditions: OJ-3, *i*-PrOH-hexane 20/80, flow rate 0.7 mL/min, 210 nm.  $t_1 = 8.37$  min (major),  $t_2 = 10.57$  min. T = 20 min.  $[\alpha]_{\text{D}}^{25} -112.3$  (c 0.34,  $\text{CHCl}_3$ ).

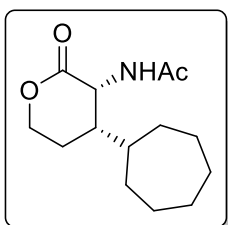

**2k:** Prepared according to general procedure for asymmetric hydrogenation as white solid in 99% yield.  $^1\text{H}$  NMR (500 MHz,  $\text{CDCl}_3$ )  $\delta$  6.37 (s, 1H), 4.73 (m, 1H), 4.37 (m, 1H), 4.29 (m, 1H), 2.91 (m, 1H), 2.09 (s, 3H), 2.03 - 1.96 (m, 1H), 1.84 - 1.72 (m, 1H), 1.72 - 1.61 (m, 3H), 1.58 - 1.52 (m, 2H), 1.52 - 1.44 (m, 2H), 1.40 (m, 3H), 1.31 - 1.26 (m, 1H), 1.25 - 1.20 (m, 1H), 1.16 (m, 1H).  $^{13}\text{C}$  NMR (126 MHz,  $\text{CDCl}_3$ )  $\delta$  173.7 (s), 170.1 (s), 77.3 (s), 77.1 (s), 76.9 (d,  $J = 31.9$  Hz), 65.9 (s), 50.6 (s), 38.8 (d,  $J = 15.5$  Hz), 33.0 (s), 27.9 (s), 27.7 (d,  $J = 3.0$  Hz), 27.4 (s), 27.2 (d,  $J = 37.7$  Hz), 23.3 (s), 22.9 (s). ESI-MS:  $m/z$  254.2  $[\text{M}+\text{H}]^+$ , 276.2  $[\text{M}+\text{Na}]^+$ ; HRMS (ESI) calculated for  $[\text{M}+\text{H}, \text{C}_{15}\text{H}_{27}\text{NNaO}_4]^+$ : 308.1832; found: 308.1838. 92%



ee. Chiral HPLC conditions: OJ-3, *i*-PrOH-hexane 20/80, flow rate 0.7 mL/min, 210 nm.  $t_1 = 8.21$  min (major),  $t_2 = 9.54$  min. T = 20 min.  $[\alpha]_D^{25} -108.6$  (c 0.54, CHCl<sub>3</sub>).

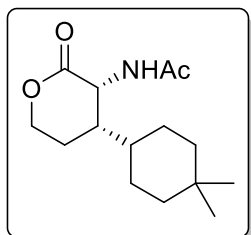

**2l:** Prepared according to general procedure for asymmetric hydrogenation as white solid in 99% yield. <sup>1</sup>H NMR (500 MHz, CDCl<sub>3</sub>)  $\delta$  6.42 (s, 1H), 4.76 (m, 1H), 4.44 - 4.26 (m, 2H), 2.85 (m, 1H), 2.09 (s, 3H), 2.04 - 1.95 (m, 1H), 1.88 (m, 1H), 1.45 - 1.32 (m, 4H), 1.18 (m, 2H), 1.07 (m, 2H), 0.87 (s, 3H), 0.82 (s, 3H). <sup>13</sup>C NMR (126 MHz, CDCl<sub>3</sub>)  $\delta$  173.7 (s), 170.1 (s), 65.8 (s), 50.5 (s), 39.1(s), 28.6 (s), 37.4 (s), 36.6 (s), 32.9 (s), 29.8 (s), 26.1 (s), 23.8 (s), 23.1 (s), 21.2 (s). ESI-MS:  $m/z$  268.3 [M+H]<sup>+</sup>, 290.3 [M+Na]<sup>+</sup>; HRMS (ESI) calculated for [M+H, C<sub>16</sub>H<sub>29</sub>NNaO<sub>4</sub>]<sup>+</sup>: 322.1989; found: 322.1993. 95% ee. Chiral HPLC conditions: OJ-3, *i*-PrOH-hexane 20/80, flow rate 0.7 mL/min, 210 nm.  $t_1 = 7.28$  min (major),  $t_2 = 8.21$  min. T = 20 min.  $[\alpha]_D^{25} -119.0$  (c 0.32, CHCl<sub>3</sub>).

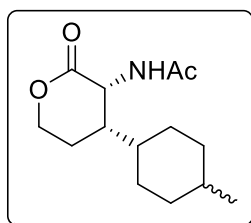

**2m:** Prepared according to general procedure for asymmetric hydrogenation as white solid in 99% yield. <sup>1</sup>H NMR (500 MHz, CDCl<sub>3</sub>)  $\delta$  6.40 (s, 1H), 4.76 (m, 1H), 4.39 (m, 1H), 4.31 (m, 1H), 2.83 (m, 1H), 2.09 (s, 3H), 2.02 - 1.93 (m, 1H), 1.93 - 1.78 (m, 2H), 1.72 - 1.64 (m, 1H), 1.55 - 1.39 (m, 4H), 1.35 - 1.28 (m, 1H), 1.20 (m, 1H), 1.08 - 0.99 (m, 1H), 0.88 (m, 4H). <sup>13</sup>C NMR (126 MHz, CDCl<sub>3</sub>)  $\delta$  173.6 (s), 170.1 (s), 77.3 (s), 77.0 (s), 76.7 (s), 65.9 (d,  $J = 5.4$  Hz), 50.5 (d,  $J = 9.0$  Hz), 37.6 (s), 37.1 (s), 36.7 (s), 36.6 (s), 35.1 (s), 34.5 (s), 32.5 (s), 31.6 (s), 31.1 (s), 30.4 (s), 26.7 (s), 25.4 (s), 24.4 (s), 23.1 (s), 23.0 (s), 22.9 (s), 22.5 (s), 19.9 (s), 17.4 (s). ESI-MS:  $m/z$  254.2 [M+H]<sup>+</sup>, 276.2 [M+Na]<sup>+</sup>; HRMS (ESI) calculated for [M+H, C<sub>15</sub>H<sub>27</sub>NNaO<sub>4</sub>]<sup>+</sup>: 308.1832; found: 308.1838. 96% ee. Chiral HPLC conditions: OJ-3, *i*-PrOH-hexane 20/80, flow rate 0.7 mL/min, 210 nm.  $t_1 = 7.43$  min (major),  $t_2 = 8.88$  min ( $t_1 = 8.15$  min (major),  $t_2 = 9.66$  min) T = 20 min.

## 5. Transformation of 2a

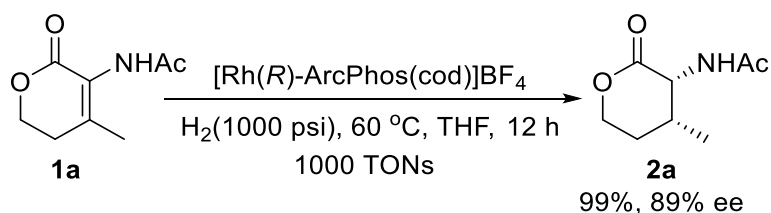

To a 25-mL vial equipped with a magnetic stirring bar was charged tetrasubstituted enamides **1a** (1.69 g, 10 mmol), [Rh(**L1**)(cod)]BF<sub>4</sub> (10 mg, 0.1 mol %, TONs = 1000) and dry THF (4 mL) under nitrogen. After stirred for 5 min at room temperature, the reaction mixture was transferred to an autoclave. The autoclave was purged with hydrogen three times and charged to 1000 psi. The mixture was stirred at room temperature for 12 h, and depressurized carefully in a well-ventilated hood. A crude reaction sample was passed through celite to remove metal precipitate and directly

analyzed by chiral HPLC to determine the conversions and ee values. The hydrogenation products were isolated in quantitative yields (1.69 g).

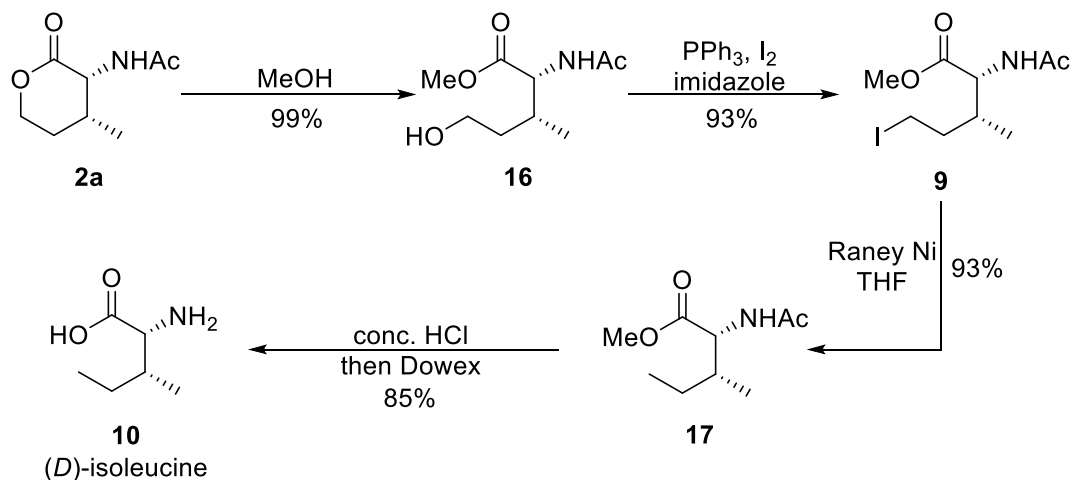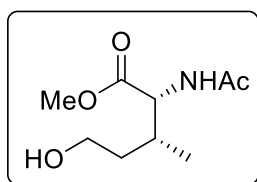

**16:** **2a** and dry MeOH (1 mL) was added to a dried Schlenk tube, the colorless transparent solution was stirred at room temperature for 1 h. The extra MeOH was removed in vacuo to give the desired product as colorless oil (99% yield). <sup>1</sup>H NMR (500 MHz, CD<sub>3</sub>OD) δ 4.40 (d, *J* = 5.5 Hz, 1H), 3.72 (d, *J* = 3.3 Hz, 3H), 3.62 (dd, *J* = 6.8, 5.4 Hz, 1H), 3.57 (dd, *J* = 7.7, 6.4 Hz, 1H), 2.18 - 2.09 (m, 1H), 1.99 (s, 3H), 1.70 - 1.62 (m, 1H), 1.45 - 1.36 (m, 1H), 0.95 (d, *J* = 6.9 Hz, 3H). <sup>13</sup>C NMR (126 MHz, CD<sub>3</sub>OD) δ 172.0 (s), 172.0 (s), 59.0 (s), 57.1 (s), 51.0 (s), 34.7 (s), 32.0 (s), 20.8 (s), 15.0 (s). ESI-MS: *m/z* 226.4 [M+Na]<sup>+</sup>; HRMS (ESI) calculated for [M+H, C<sub>9</sub>H<sub>17</sub>NNaO<sub>4</sub>]<sup>+</sup>: 226.1050; found: 226.1056. [α]<sub>D</sub><sup>25</sup> -409.8 (c 0.09, CHCl<sub>3</sub>).

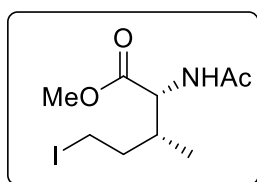

**9:** To a dry round-bottom bottle with a stirring bar was added I<sub>2</sub> (1.3 equiv) and DCM (2 mL), then PPh<sub>3</sub> (1.3 equiv) was added at 0 °C, the generated yellow solution was kept for 15 min, then imidazole (2.0 equiv) was added. After 15 min at room temperature, **16** (1.0 equiv) in DCM was added via syringe dropwise and the generated pale-yellow suspension was kept for about 3 hours. The mixture was concentrated, and column chromatography (PE:EA=3:1) to obtain desired product as white solid in 93% yield. <sup>1</sup>H NMR (500 MHz, CDCl<sub>3</sub>) δ 6.03 (d, *J* = 7.1 Hz, 1H), 4.61 (dd, *J* = 8.4, 5.0 Hz, 1H), 3.76 (s, 3H), 3.29 (d, *J* = 4.9 Hz, 1H), 3.12 (d, *J* = 9.1 Hz, 1H), 2.10 (s, 1H), 2.04 (s, 3H), 2.00 - 1.91 (m, 1H), 1.74 - 1.66 (m, 1H), 0.92 (d, *J* = 6.9 Hz, 3H). <sup>13</sup>C NMR (126 MHz, CDCl<sub>3</sub>) δ 172.1 (s), 169.8 (s), 55.9 (s), 52.4 (s), 37.4 (s), 36.5 (s), 23.3 (s), 15.1 (s), 3.5 (s). ESI-MS: *m/z* 314.1 [M+H]<sup>+</sup>, 335.9 [M+Na]<sup>+</sup>; HRMS (ESI) calculated for [M+H, C<sub>9</sub>H<sub>16</sub>INNaO<sub>3</sub>]<sup>+</sup>: 336.0067; found: 336.0071. [α]<sub>D</sub><sup>25</sup> -163.3 (c 0.11, CHCl<sub>3</sub>).

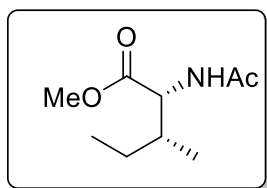

**17:** To a round-bottom bottle with a stirring bar was added **9** (1.0 equiv) in THF (2 mL) and then Raney Nickel (in H<sub>2</sub>O, 2 equiv). The mixture was kept at room temperature for 1 h and extracted with H<sub>2</sub>O/EtOAc (three times). The combined organic layers were concentrated and purified by silica gel column chromatography to give the desired product compound as white solid in 93% yield. <sup>1</sup>H NMR (500 MHz, CDCl<sub>3</sub>) δ 6.05 (s, 1H), 4.70 (m, 1H), 3.71 (s, 3H), 2.02 (s, 3H), 1.93 - 1.86 (m, 1H), 1.43 - 1.34 (m, 1H), 1.19 - 1.09 (m, 1H), 0.92 (t, *J* = 6.4 Hz, 3H), 0.84 (d, *J* = 8.9 Hz, 3H). <sup>13</sup>C NMR (126 MHz, CDCl<sub>3</sub>) δ 173.1 (s), 170.1 (s), 55.3 (s), 52.2 (s), 37.7 (s), 26.1 (s), 23.2 (s), 14.6 (s), 11.7 (s). [ $\alpha$ ]<sub>D</sub><sup>25</sup> -333.8 (c 0.04, CHCl<sub>3</sub>).

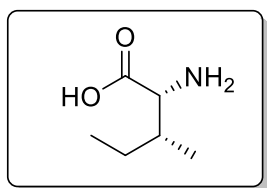

**10:** To a sealed tube with a stirring bar was added **17** and conc. HCl (2 mL). The mixture was kept at 80 °C for 3 h. Then, the solvent was removed in vacuo and the mixture was purified through Dowex (H<sup>+</sup> type) to obtain the desired product as white solid (85% yield). <sup>1</sup>H NMR (500 MHz, d<sub>2</sub>O) δ 3.69 (d, *J* = 3.5 Hz, 1H), 2.02 (m, 1H), 1.39 - 1.34 (m, 1H), 1.34 - 1.25 (m, 1H), 0.94 - 0.88 (m, 6H). <sup>13</sup>C NMR (126 MHz, d<sub>2</sub>O) δ 174.6 (s), 58.3 (s), 35.5 (s), 25.4 (s), 13.1 (s), 10.9 (s). [ $\alpha$ ]<sub>D</sub><sup>25</sup> -121.4 (c 0.03, H<sub>2</sub>O).

## 6. Original NMR Data of substrates

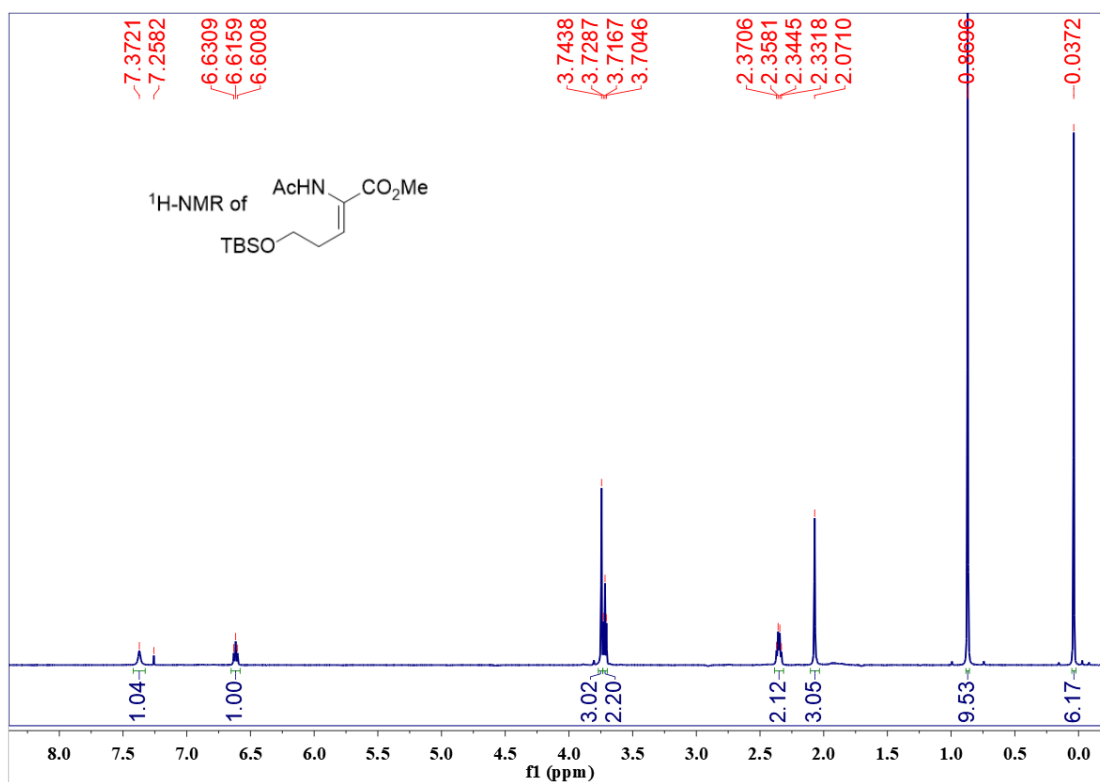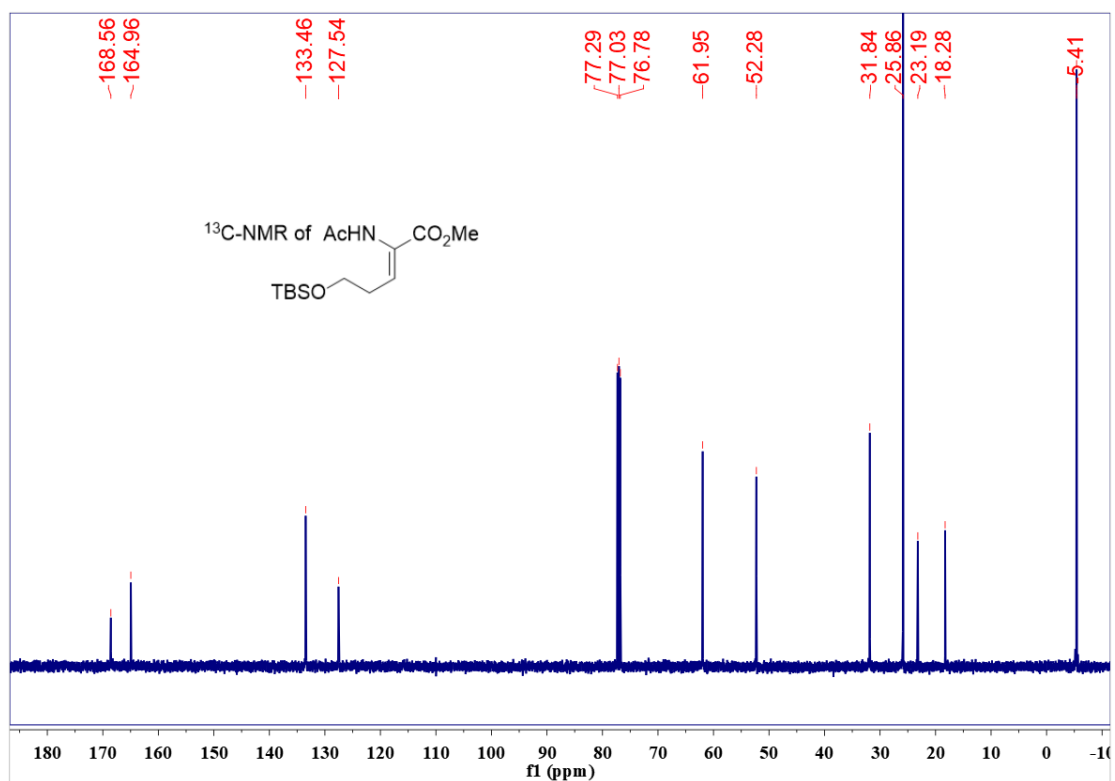

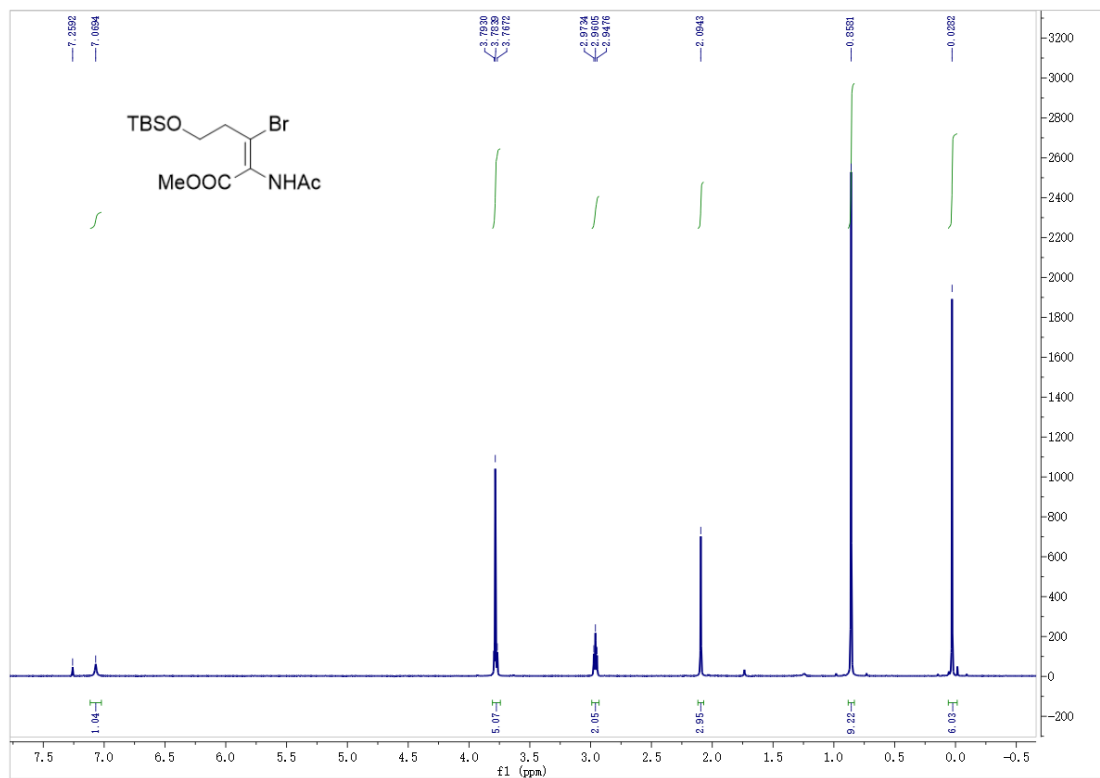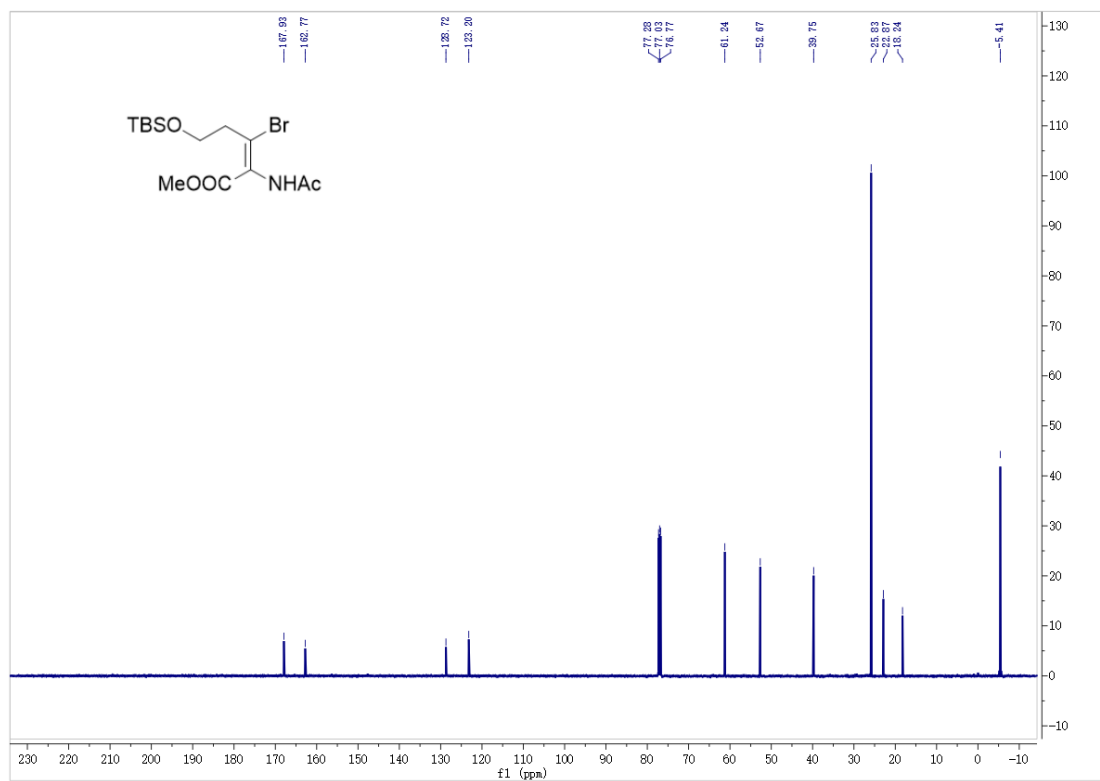

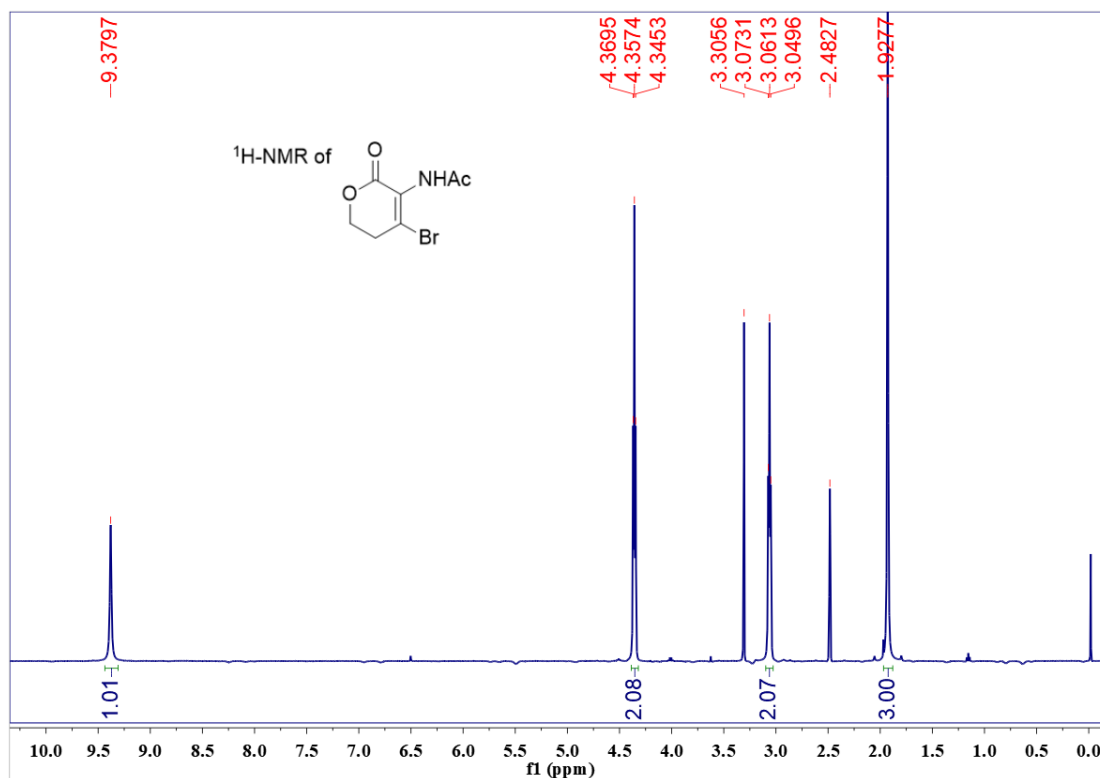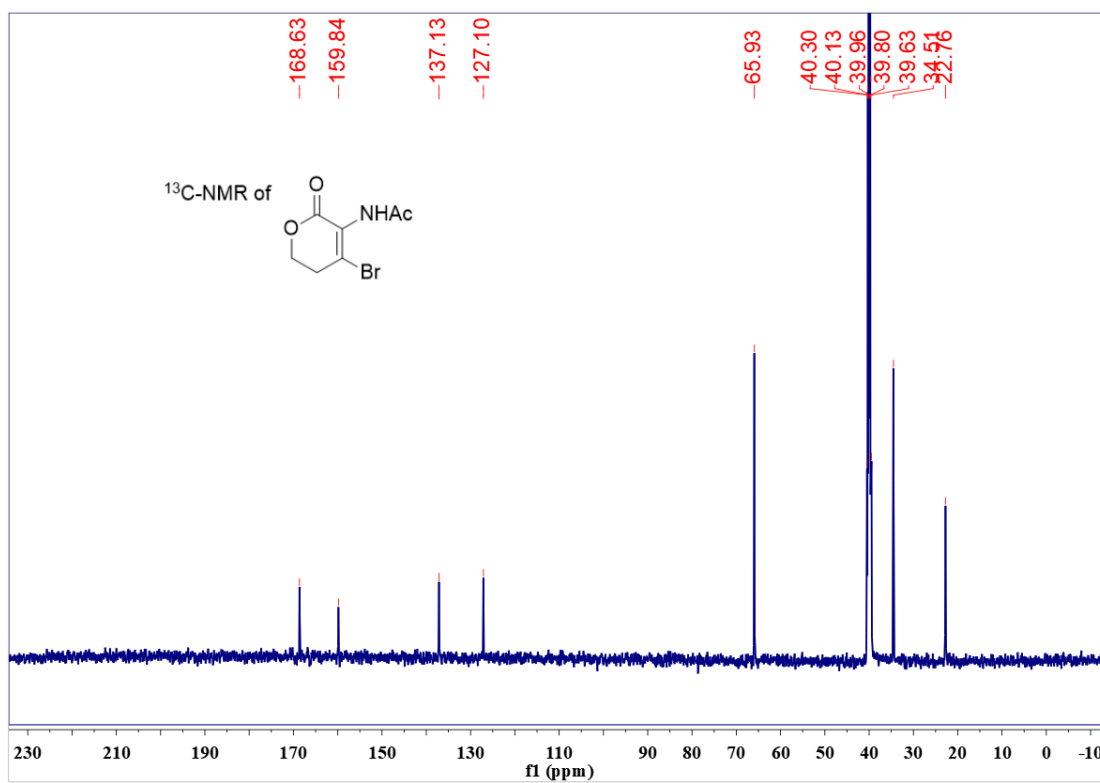

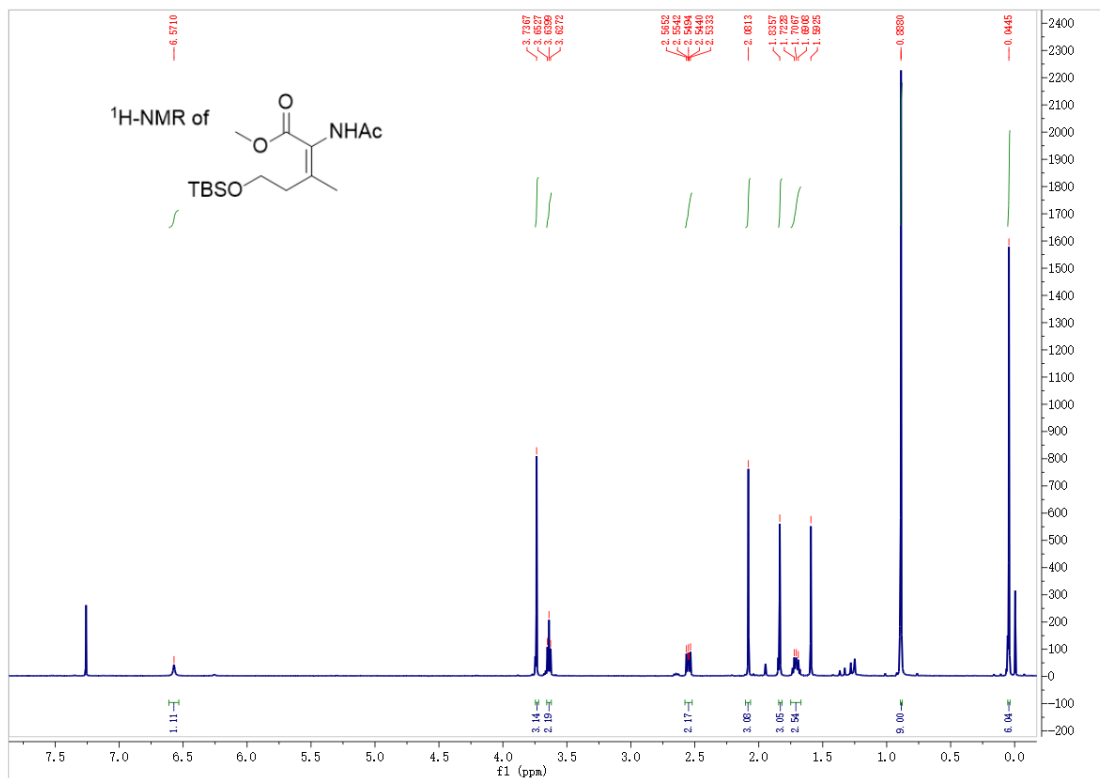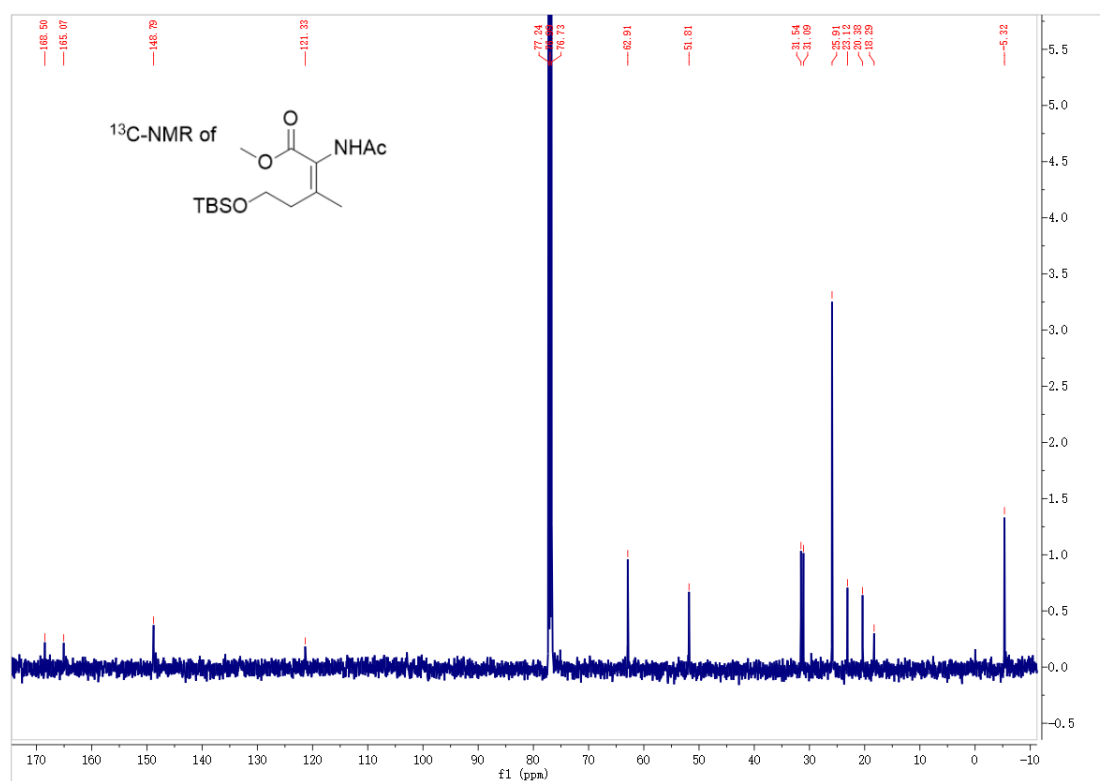

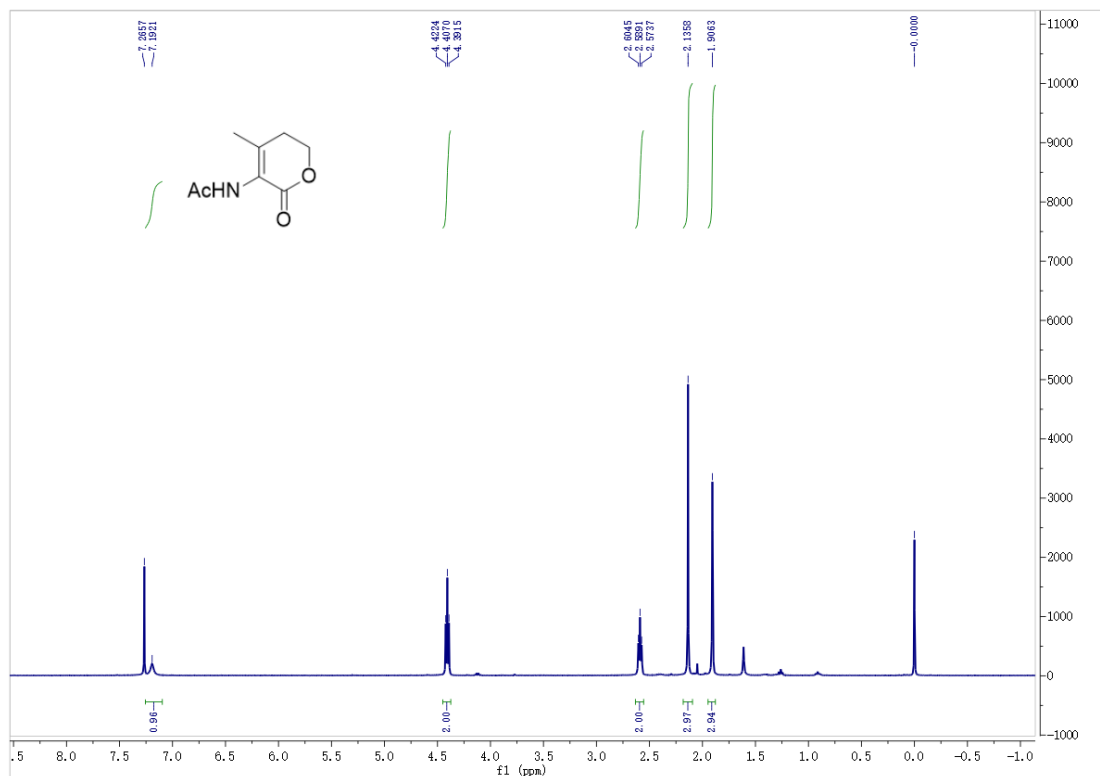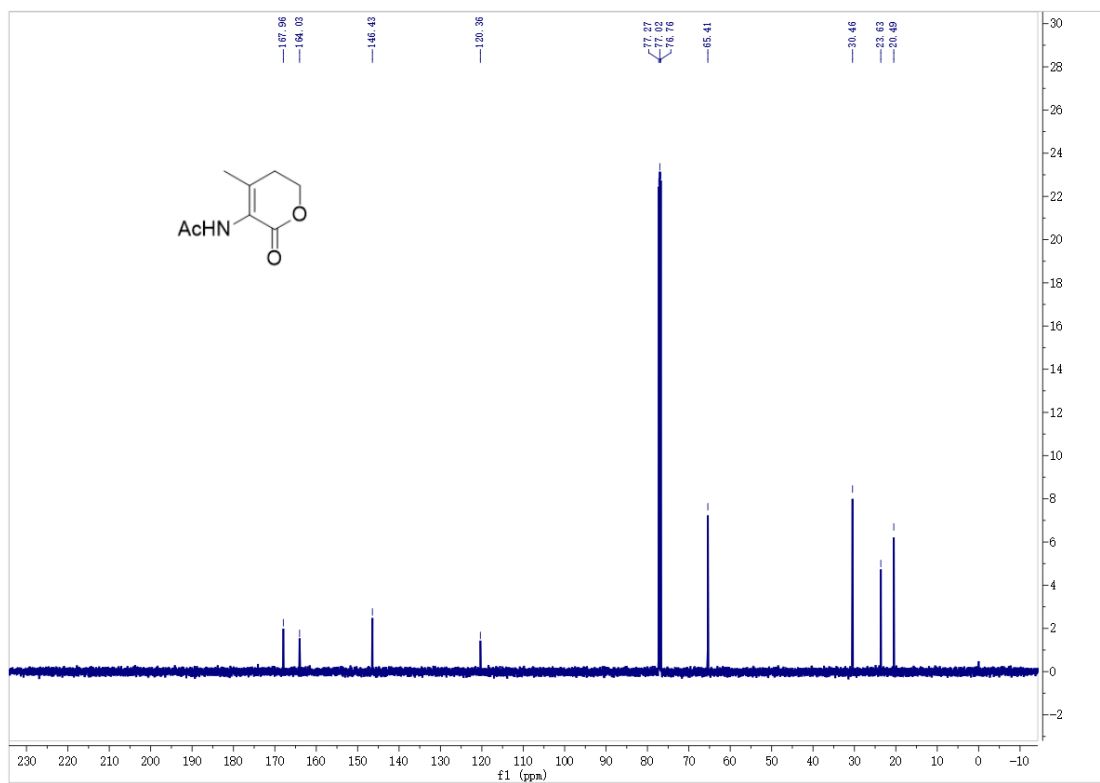



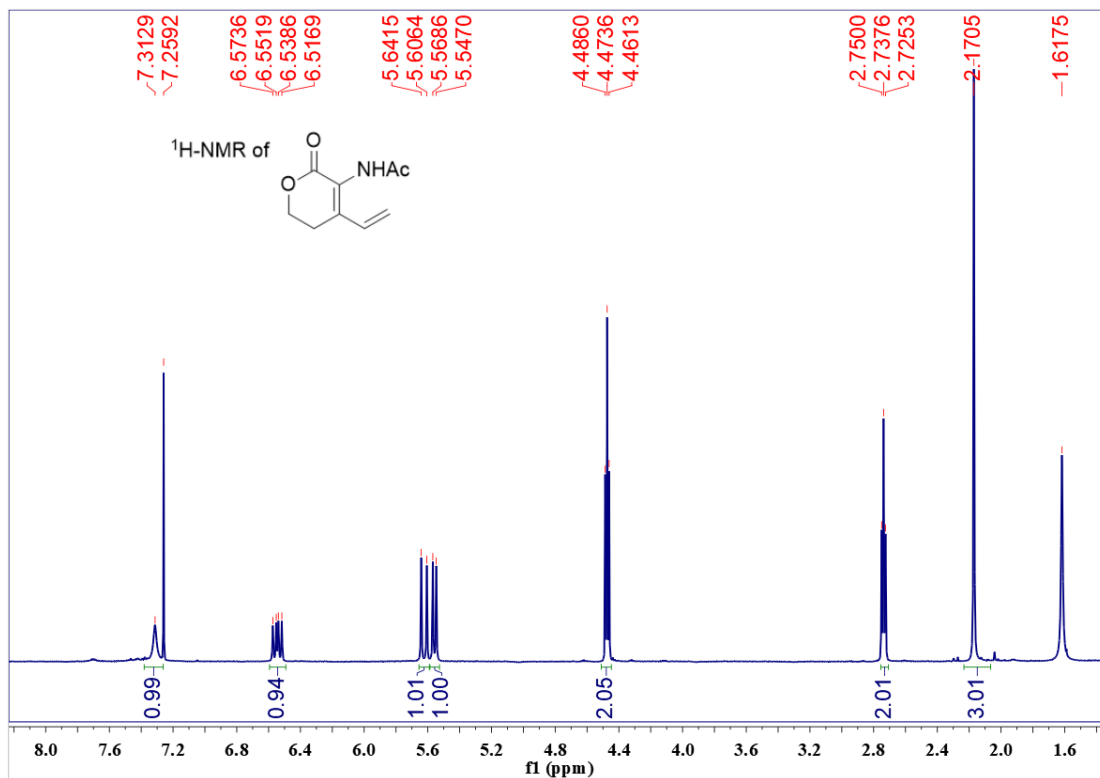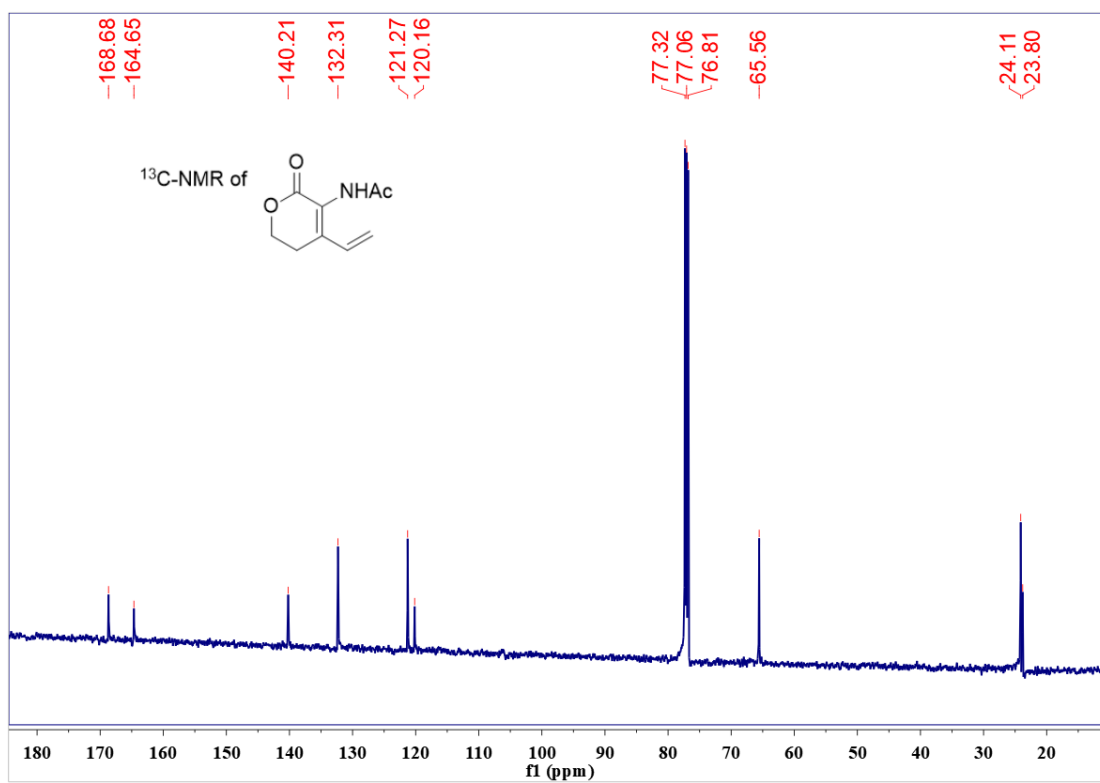

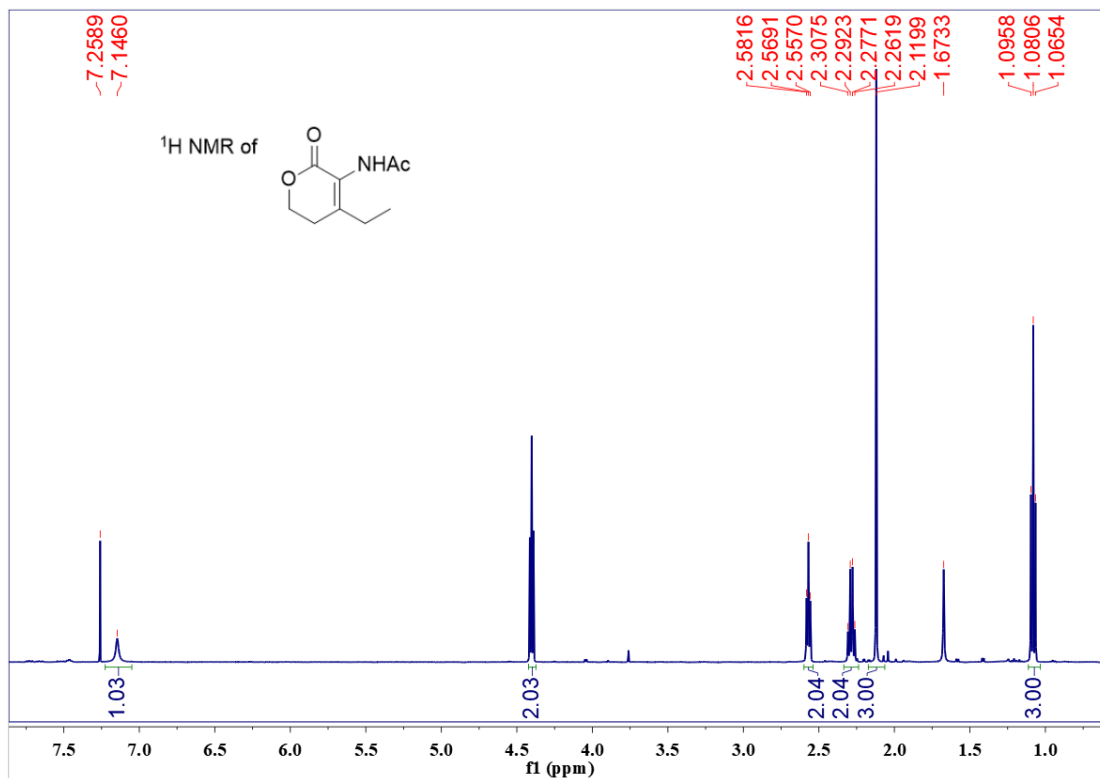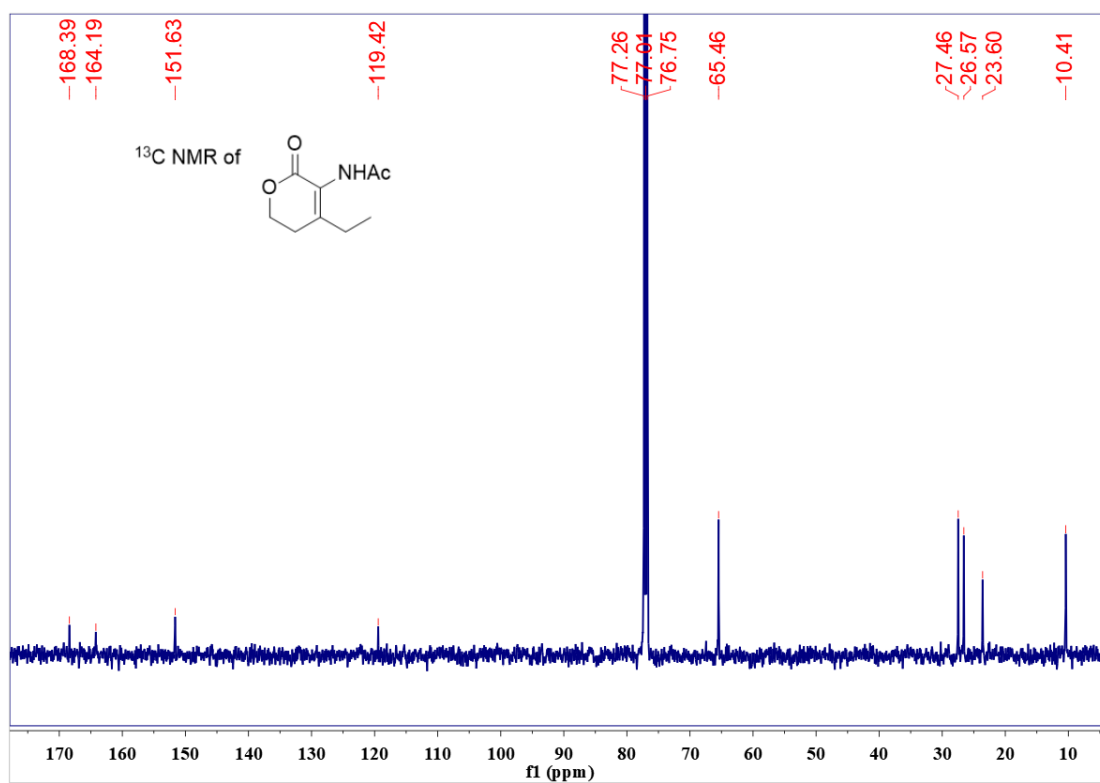

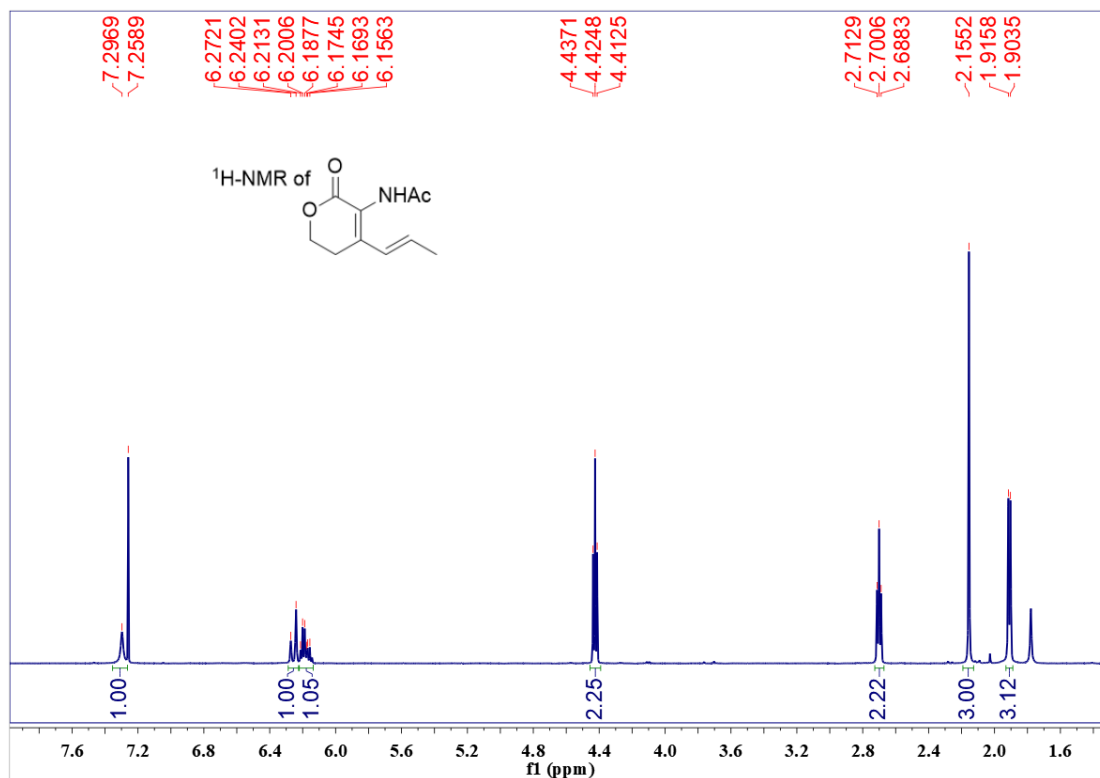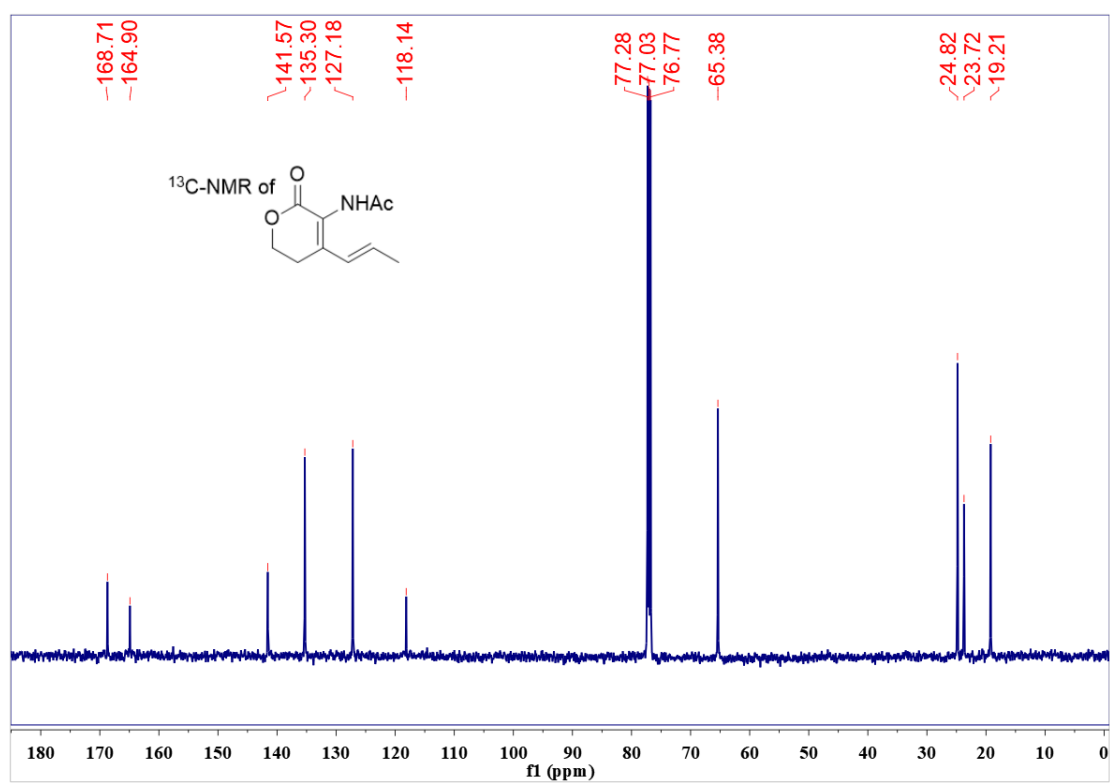

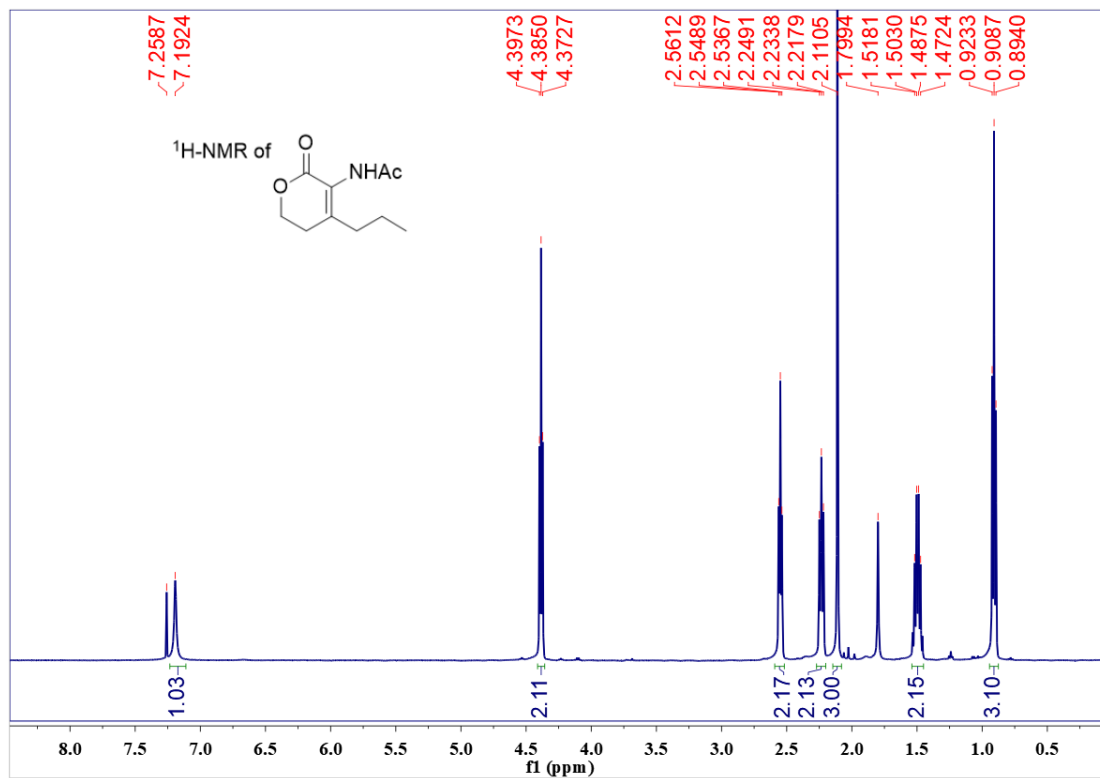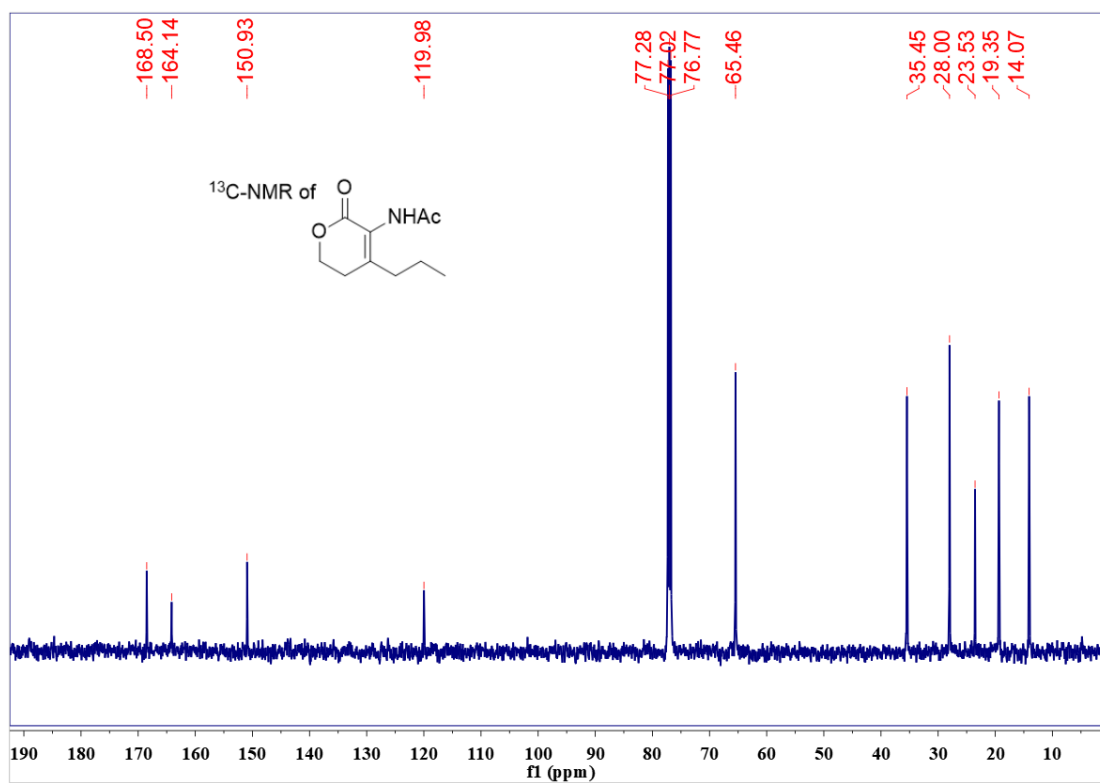

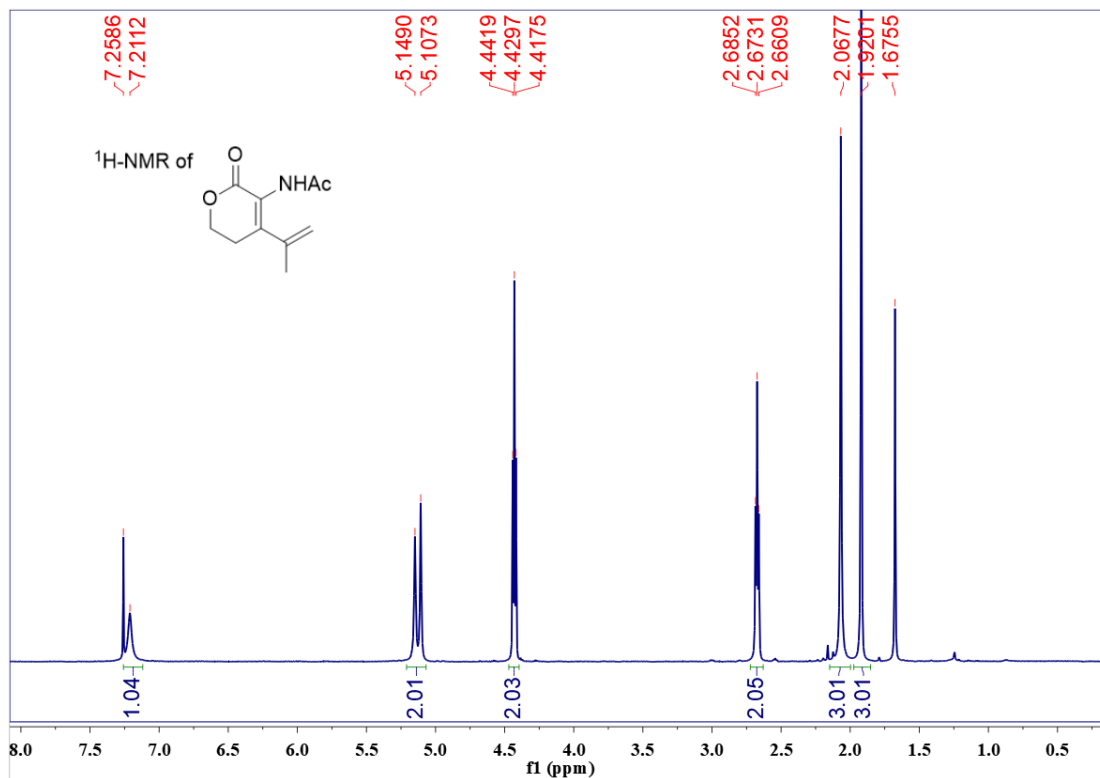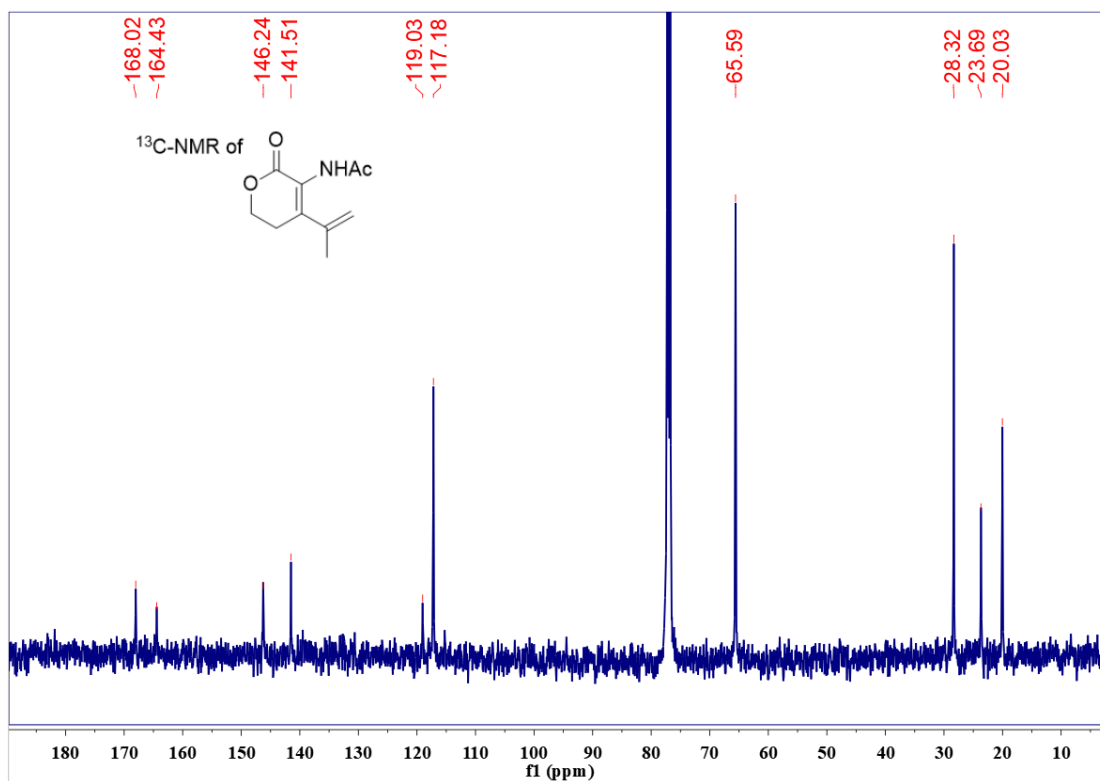

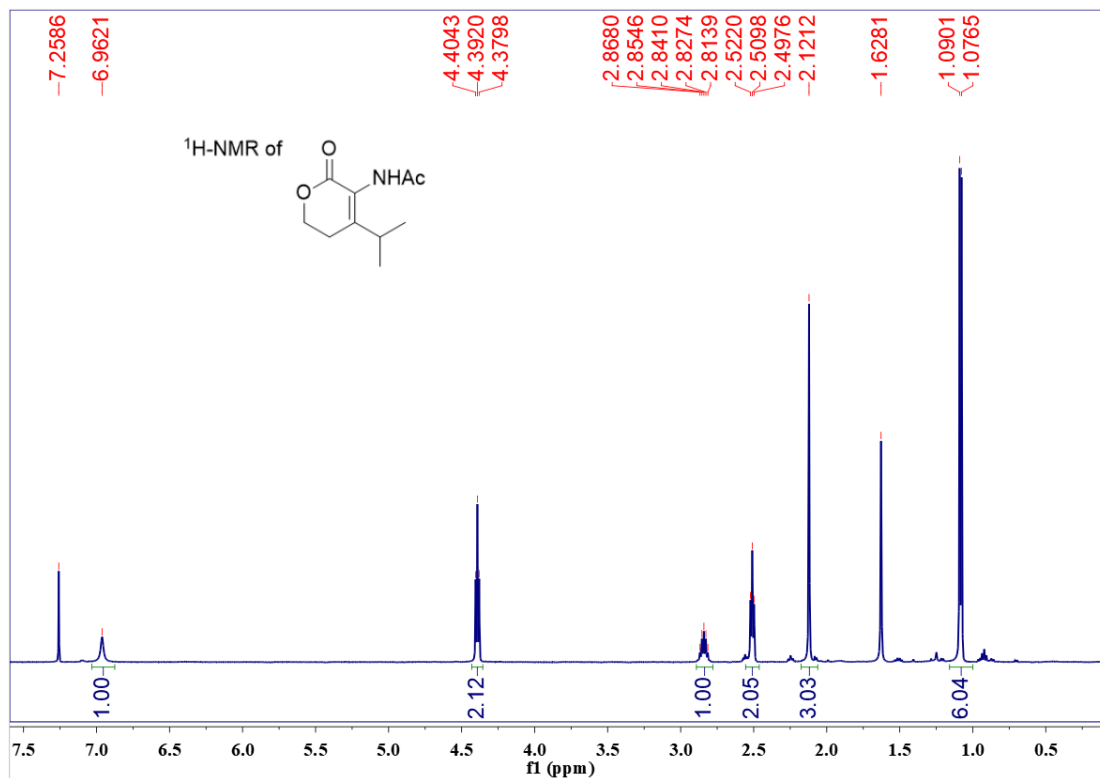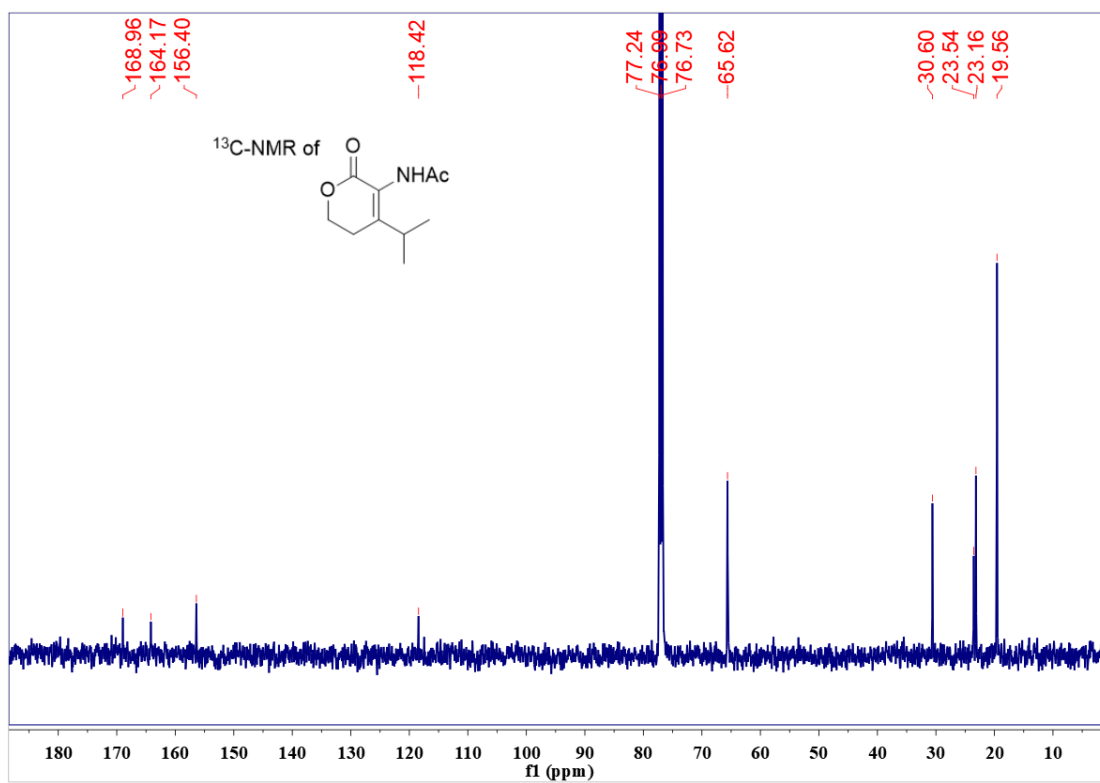

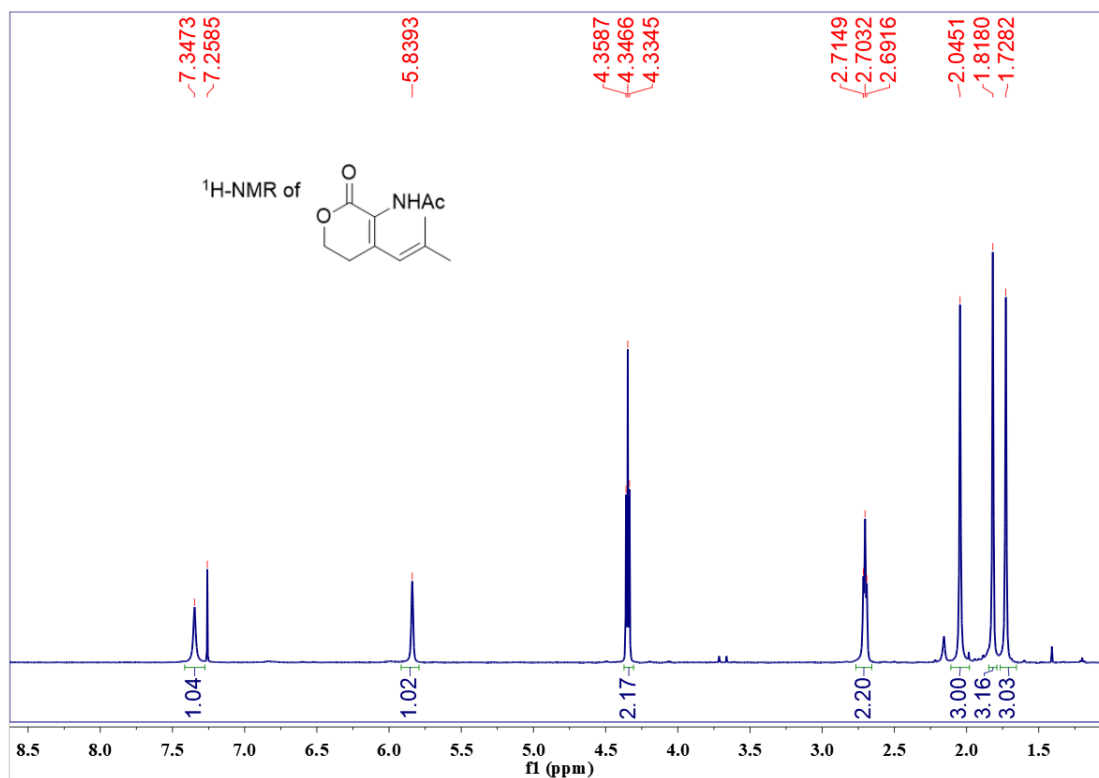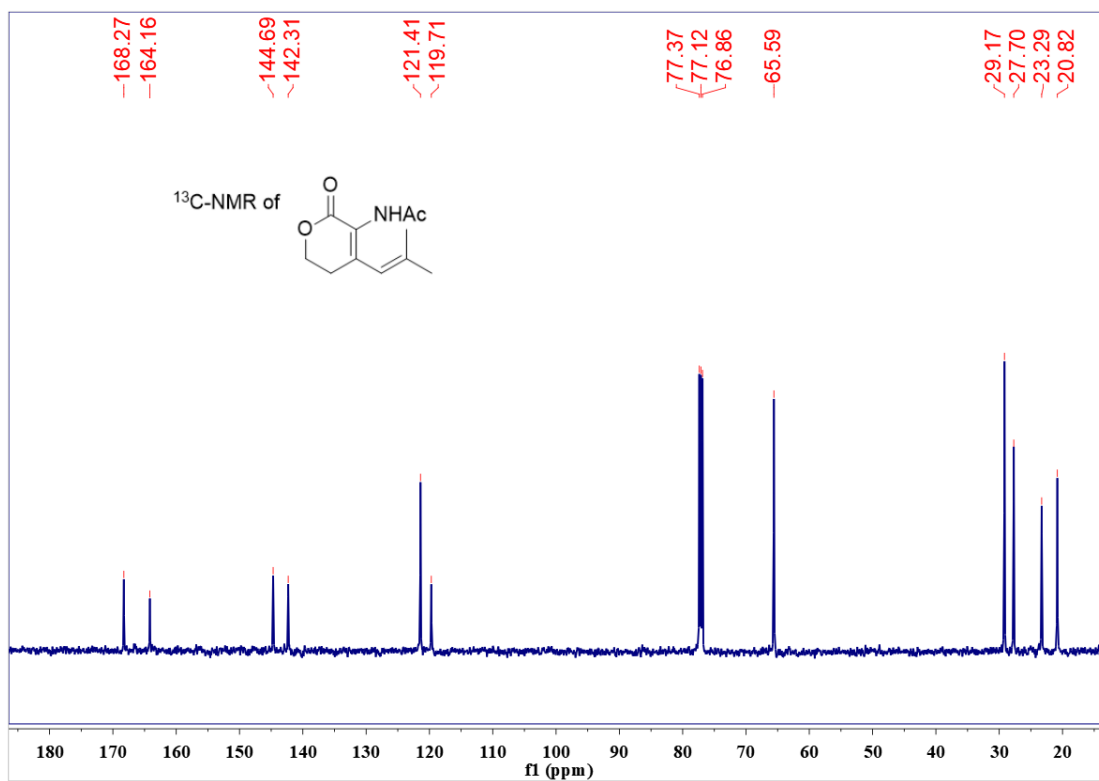

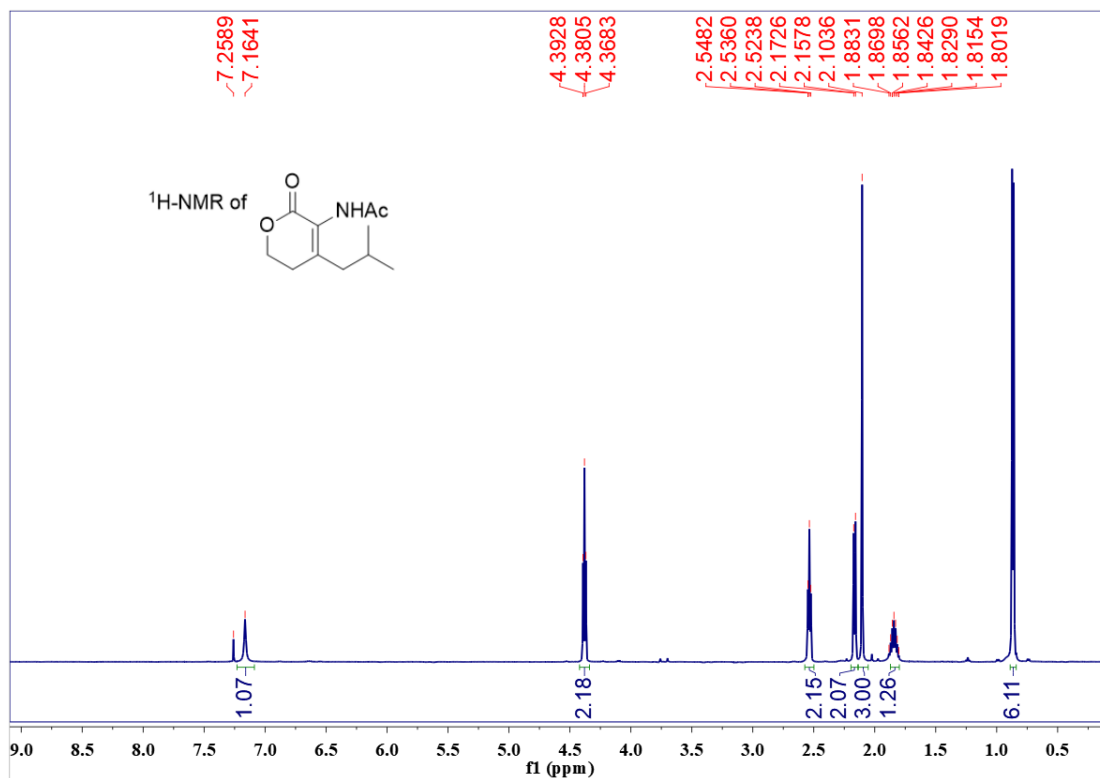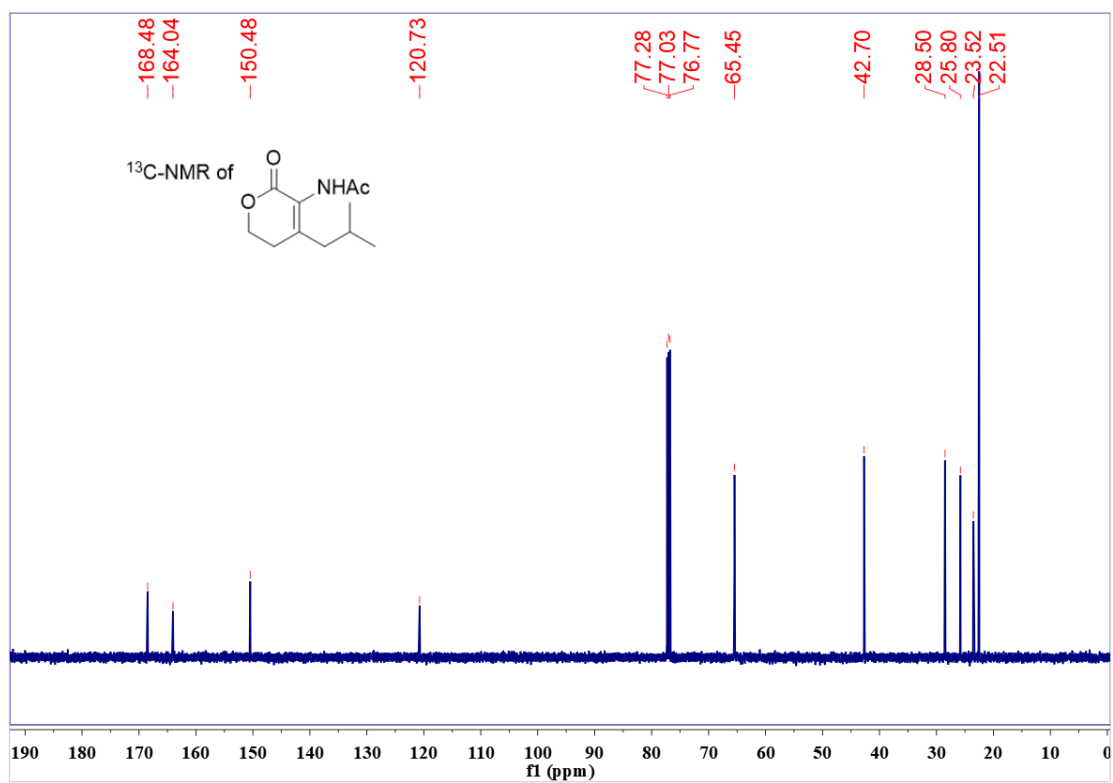



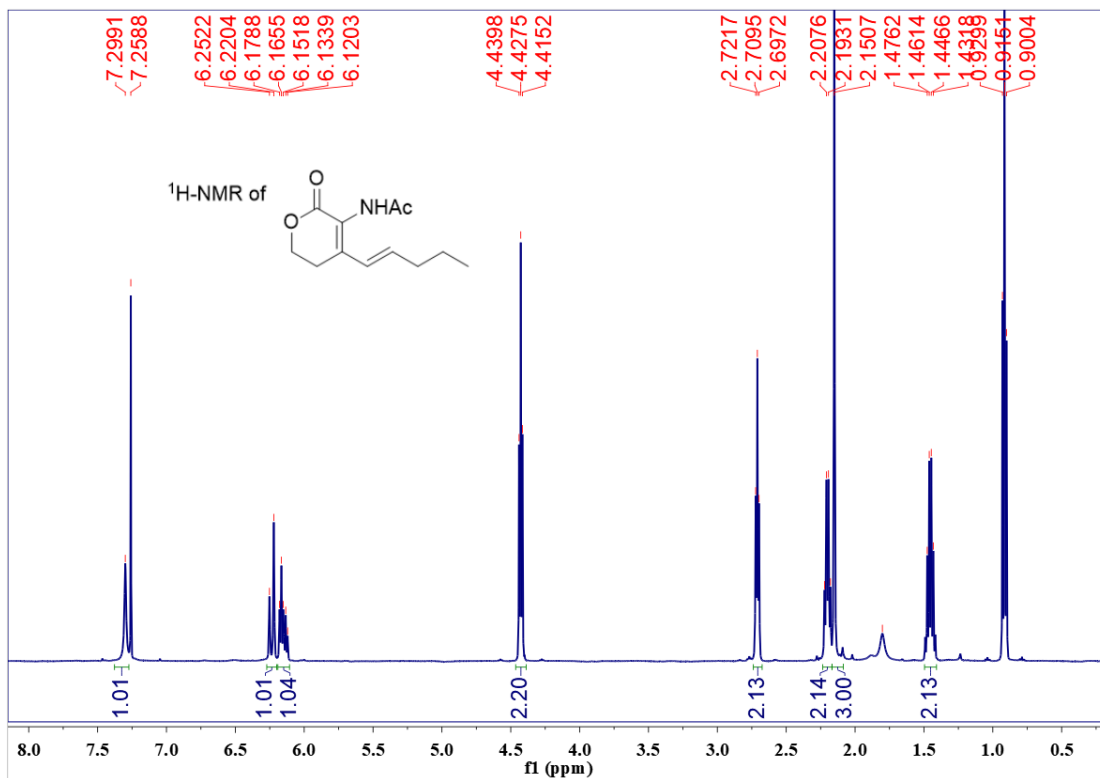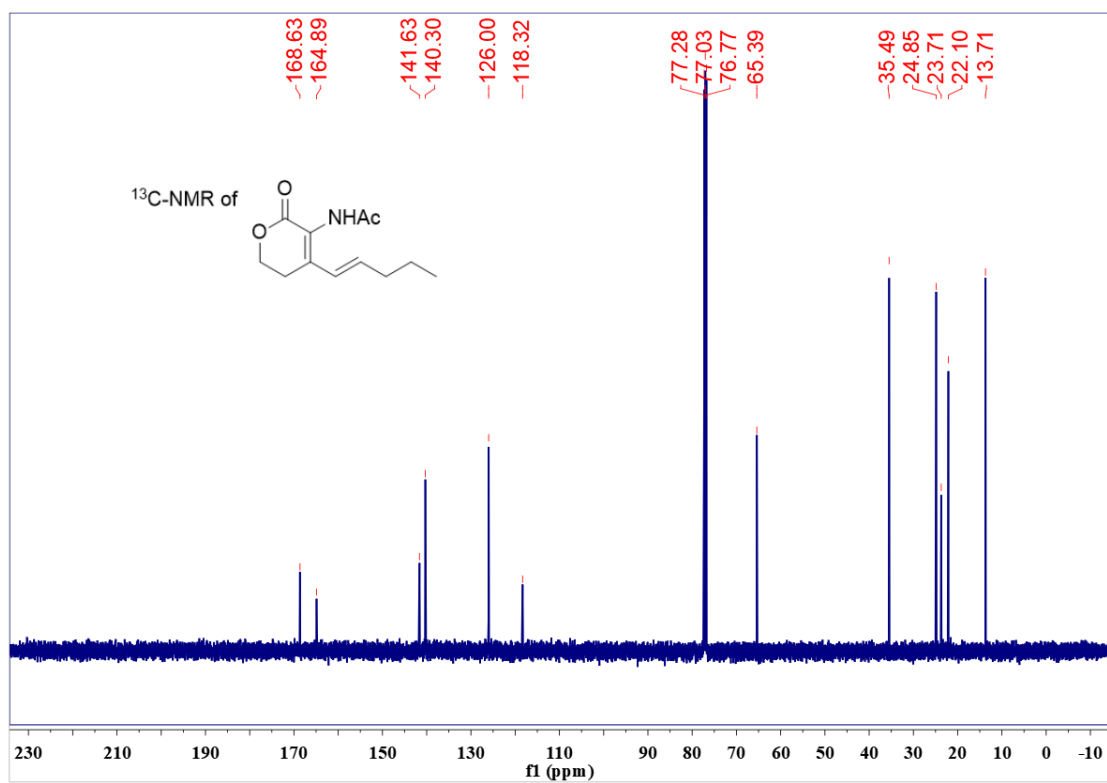

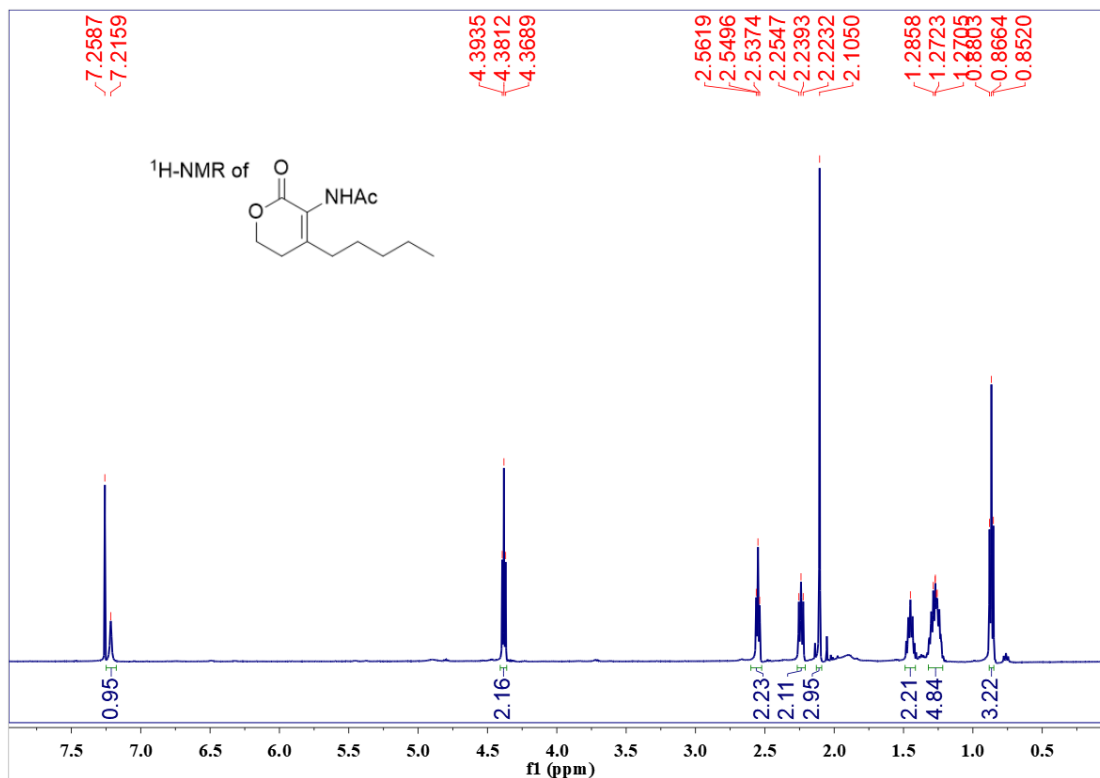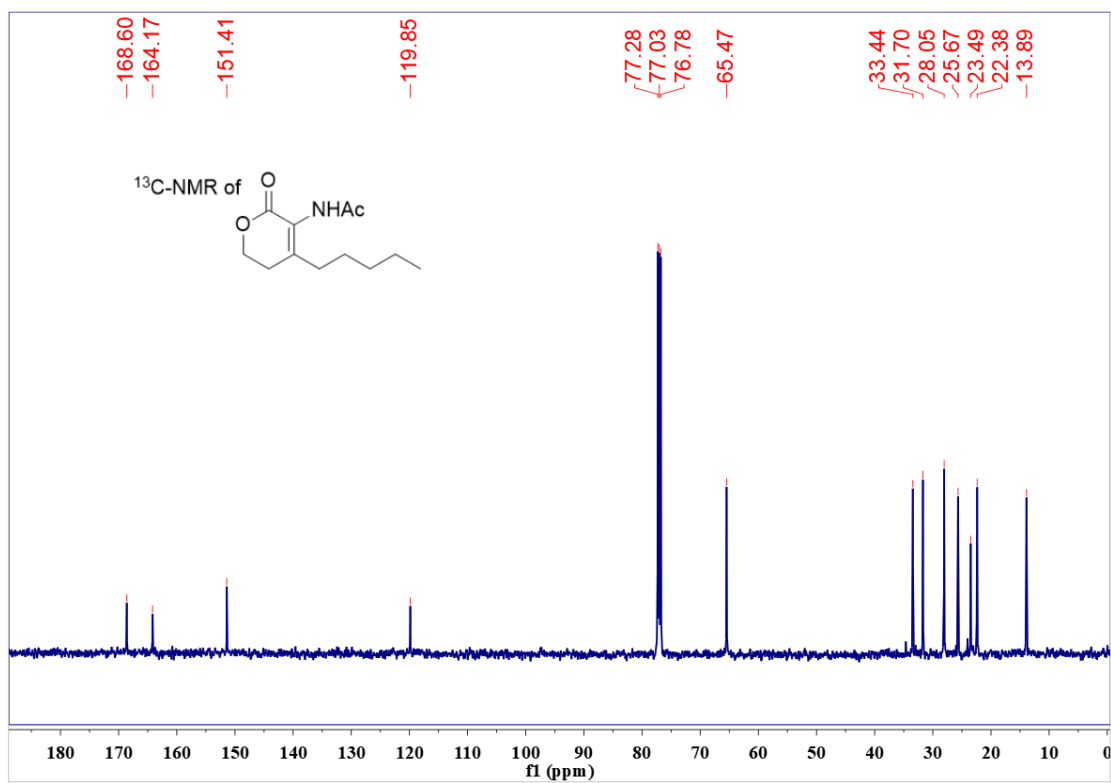

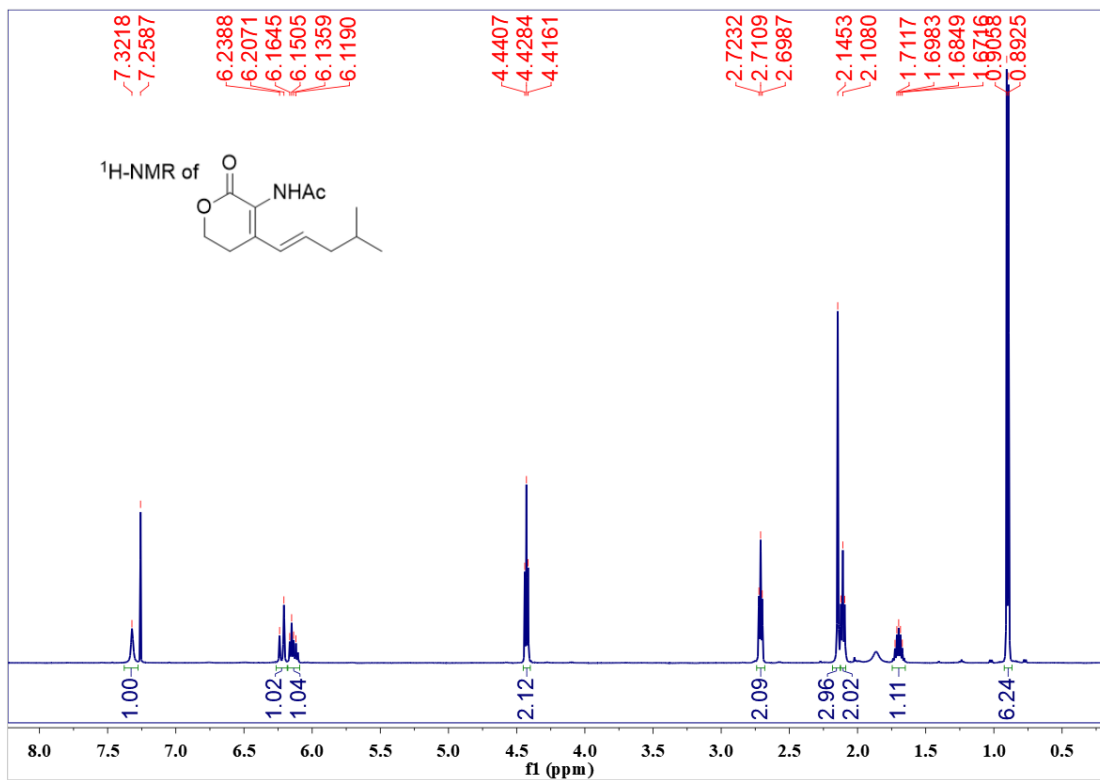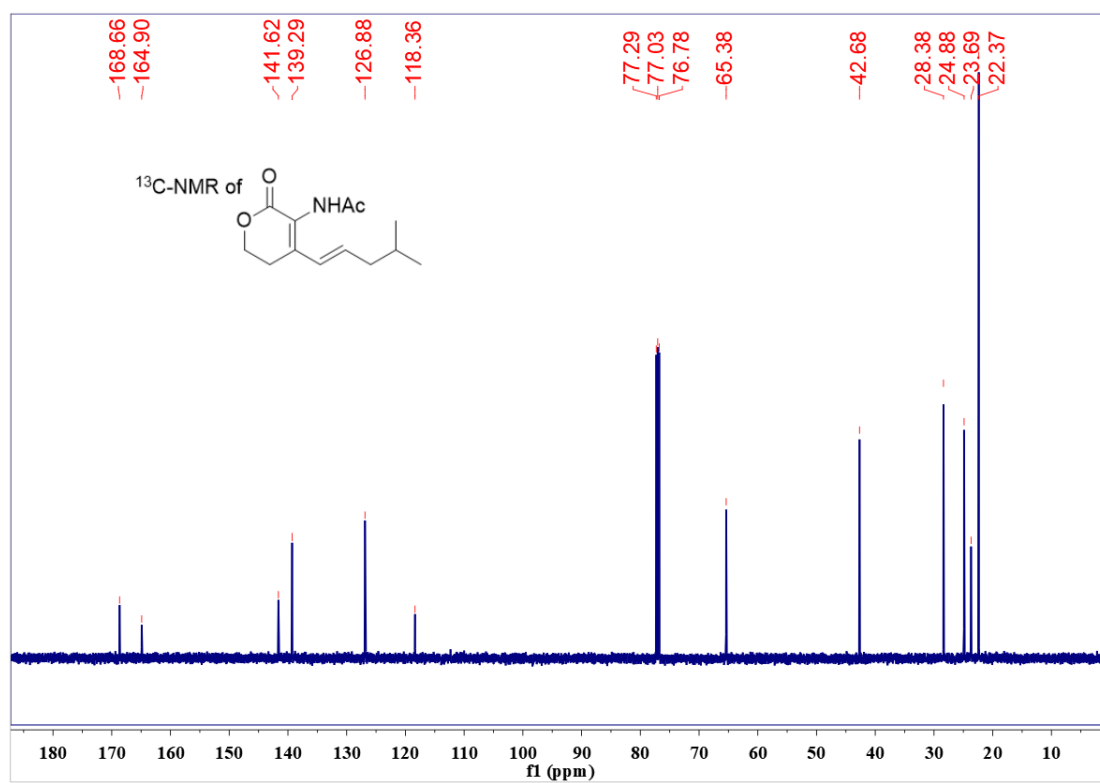

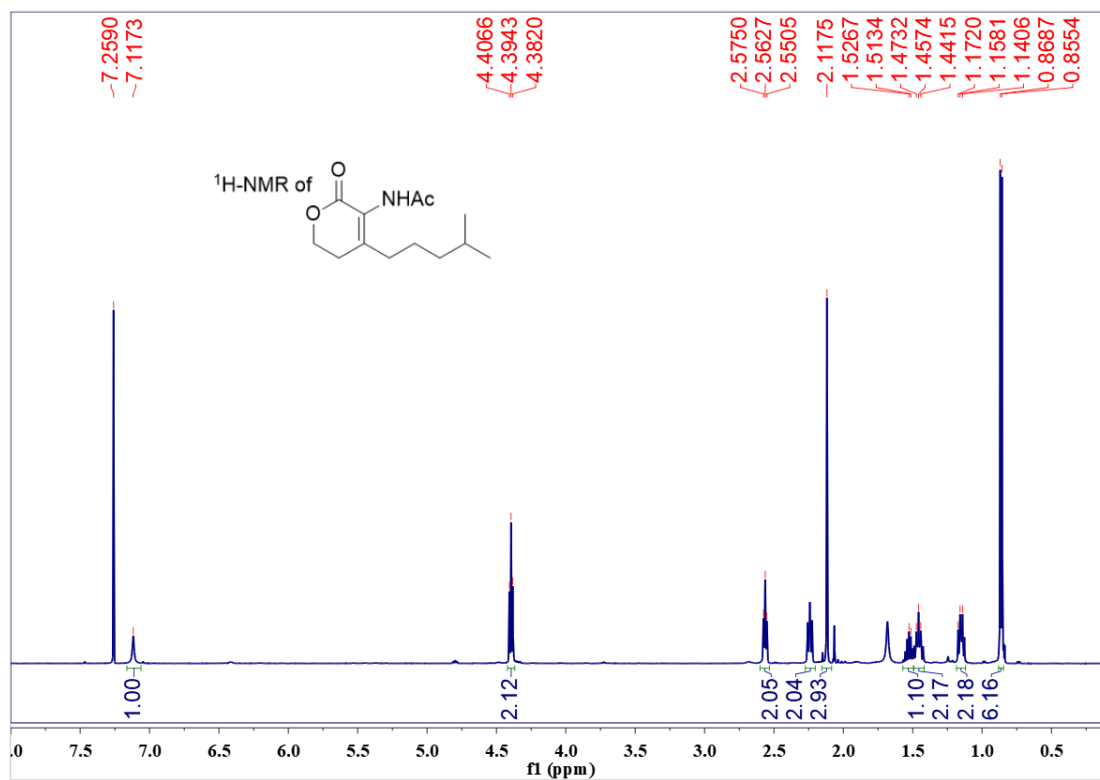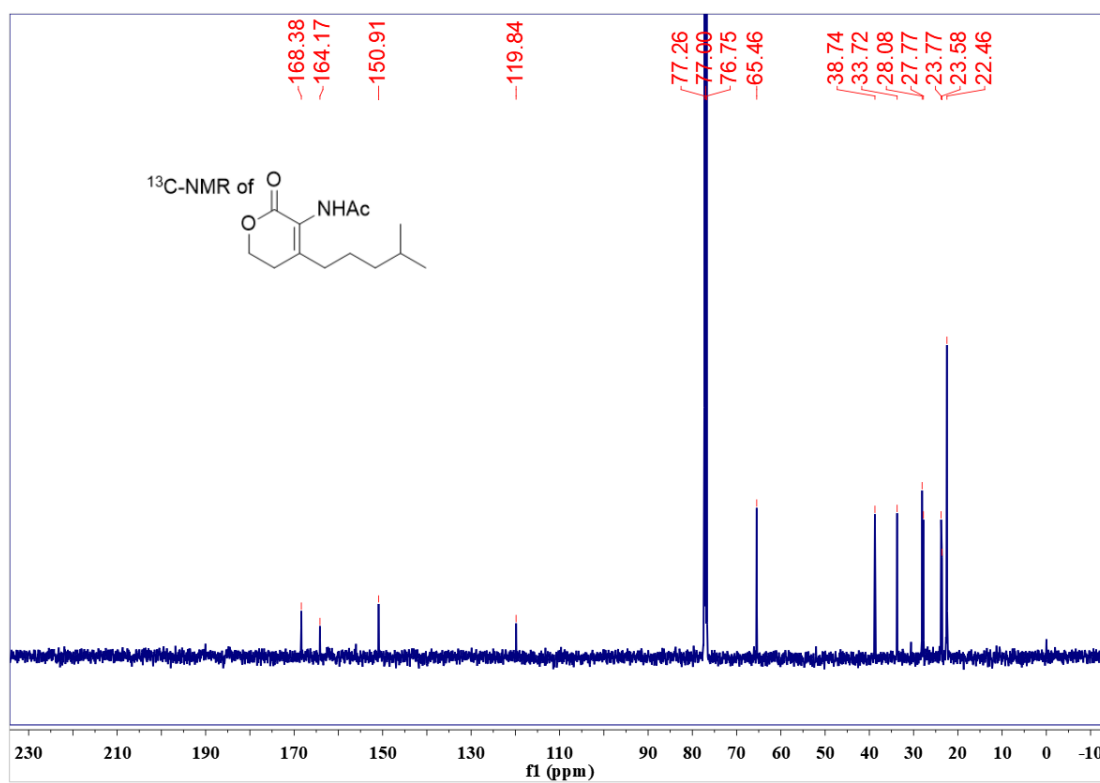

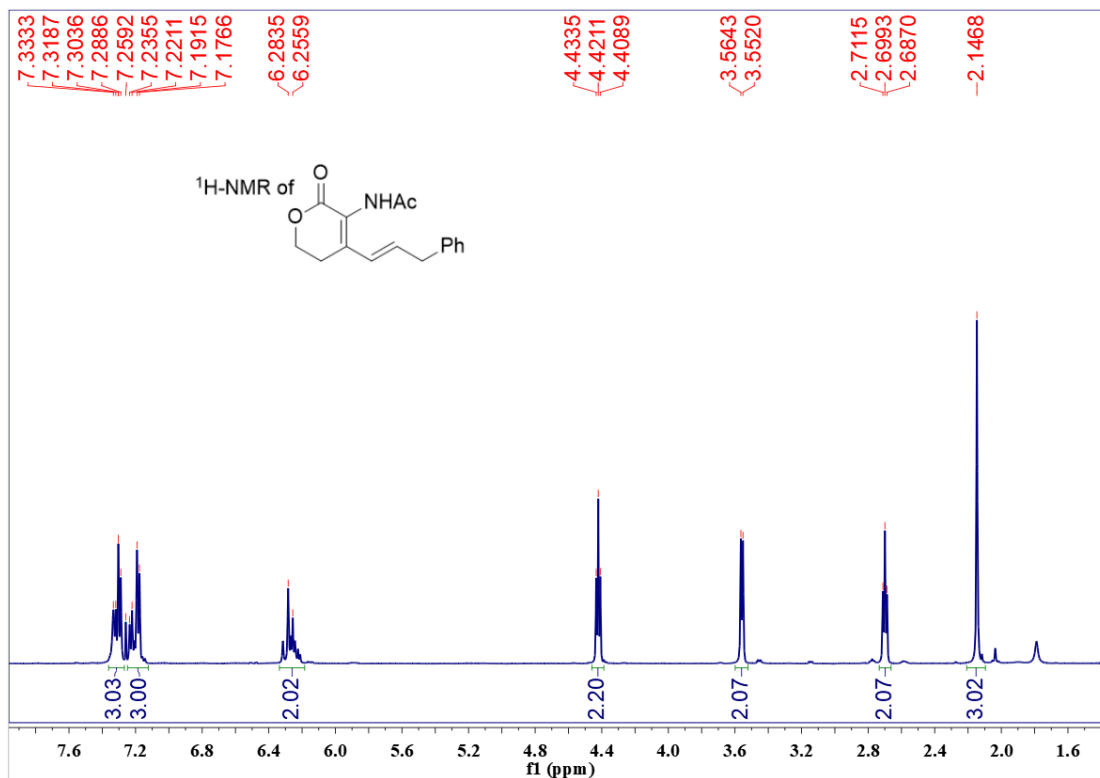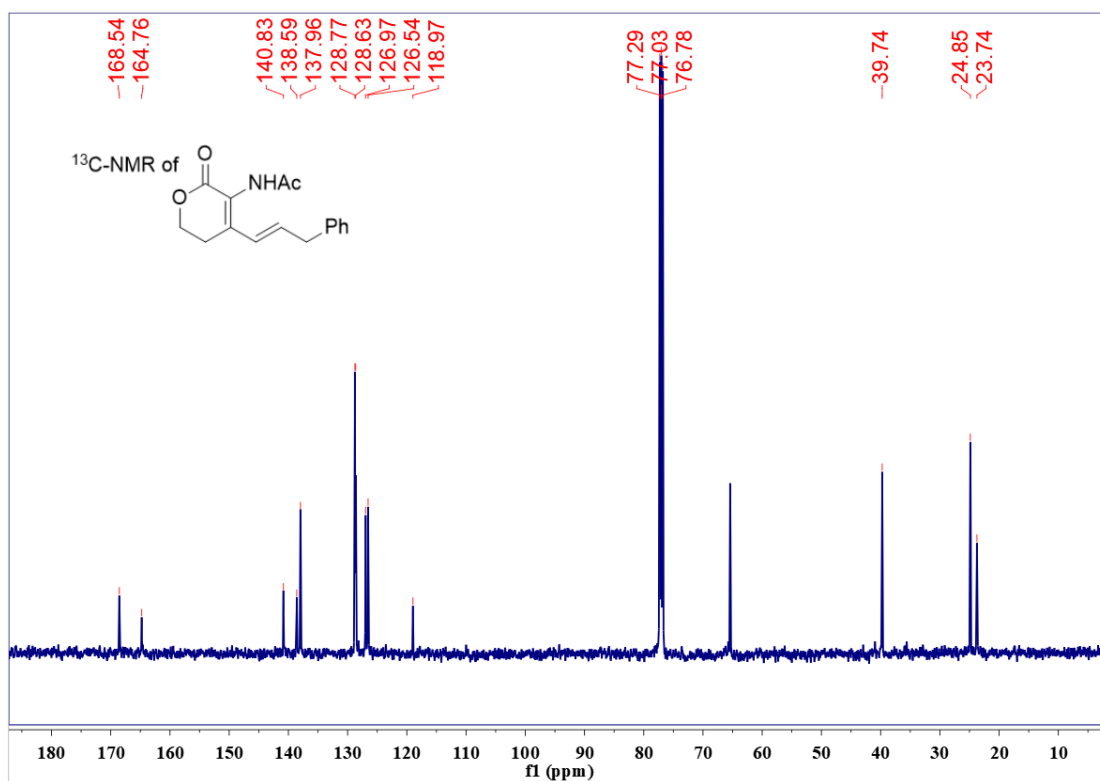

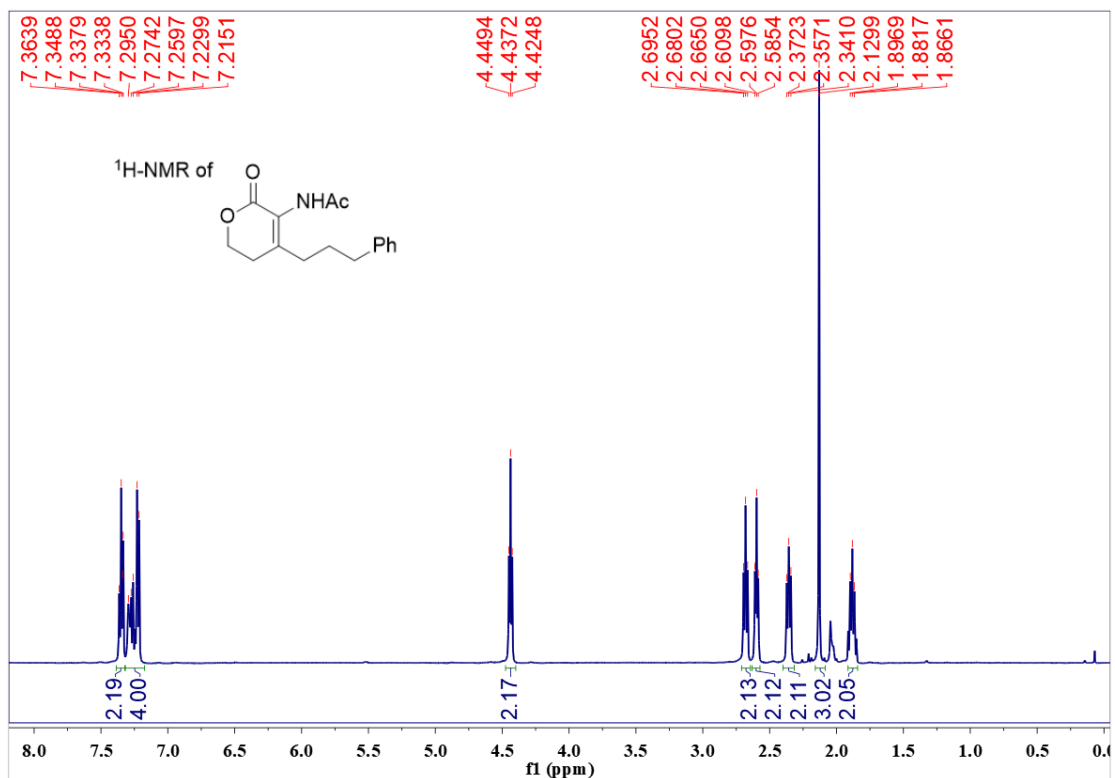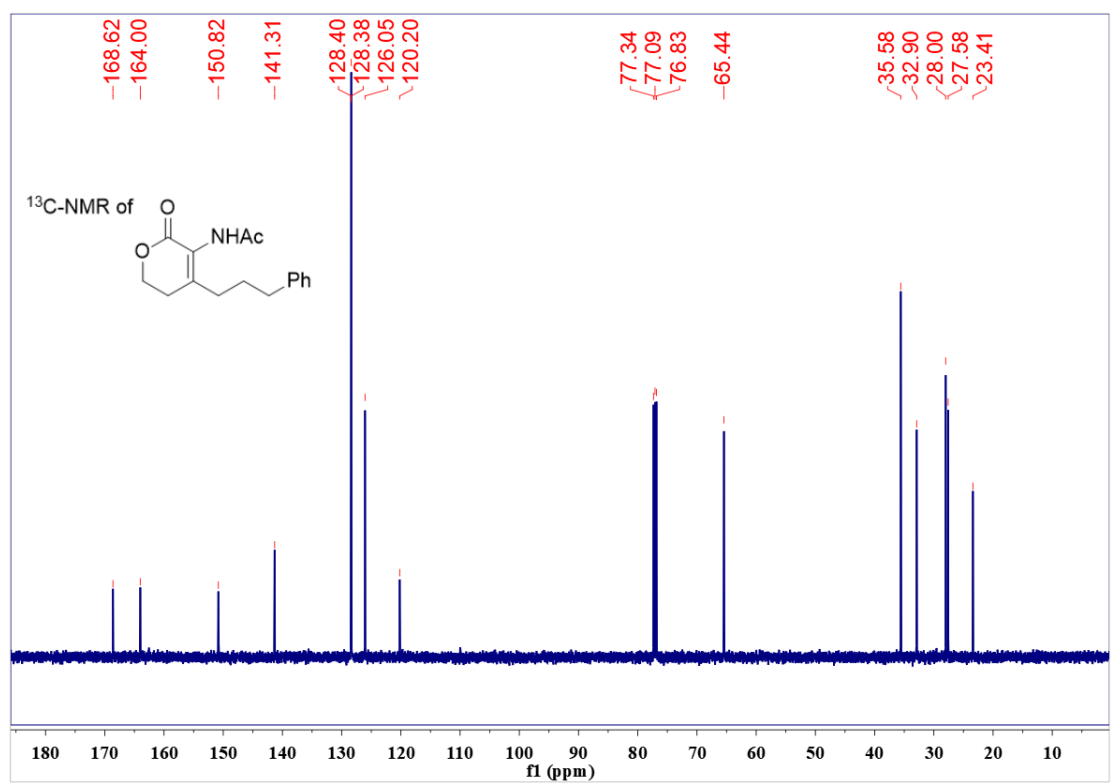

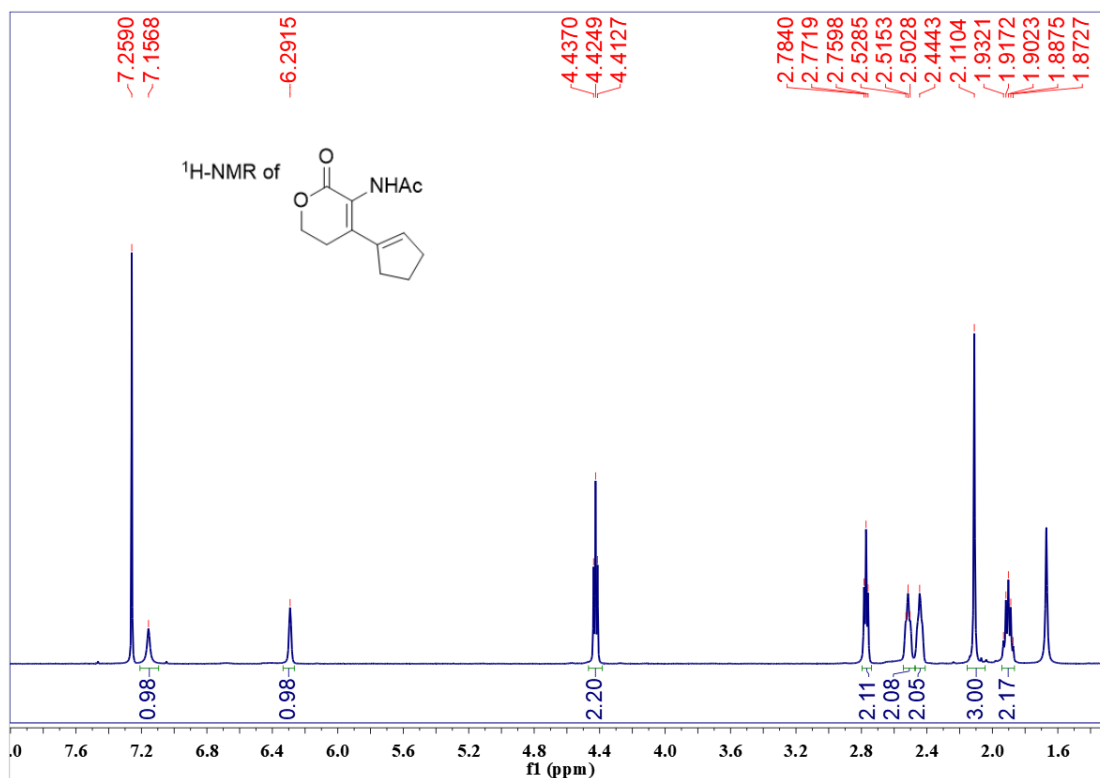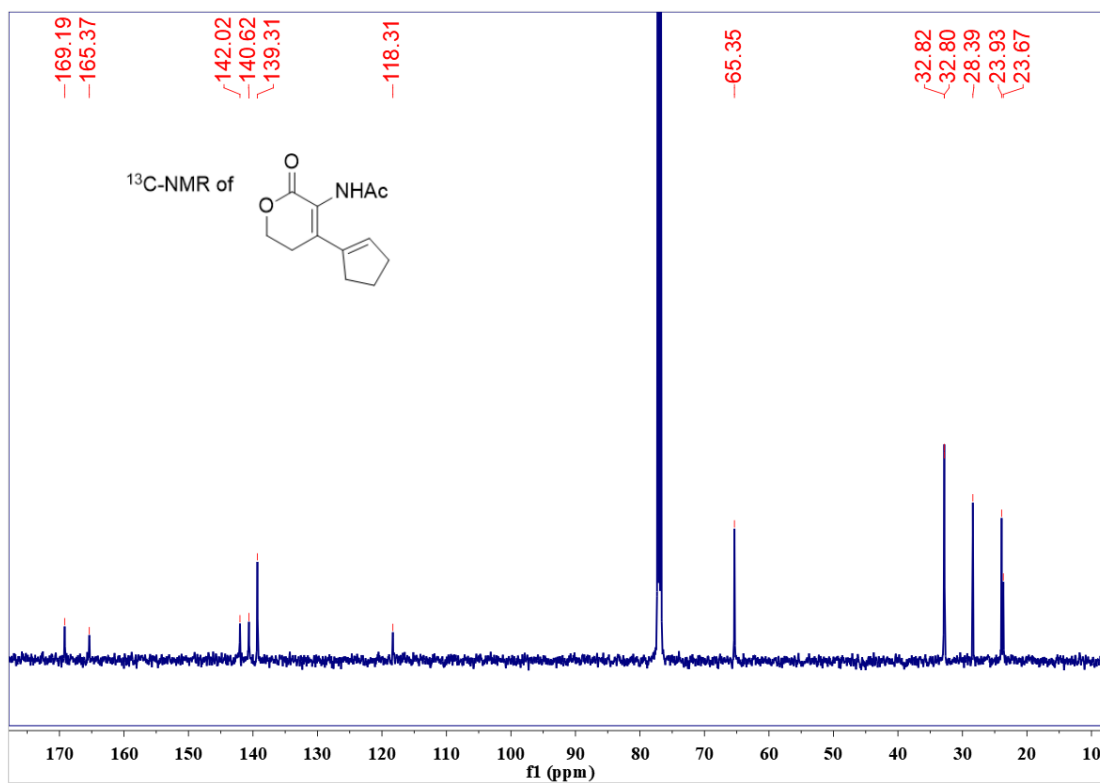

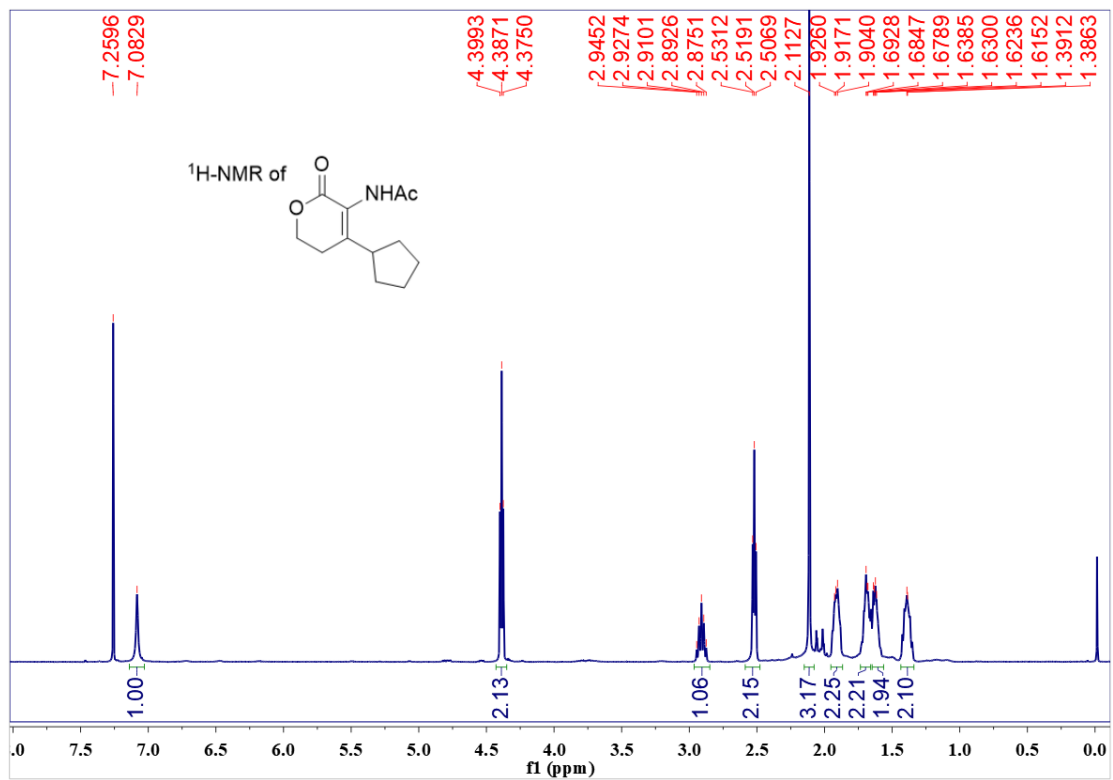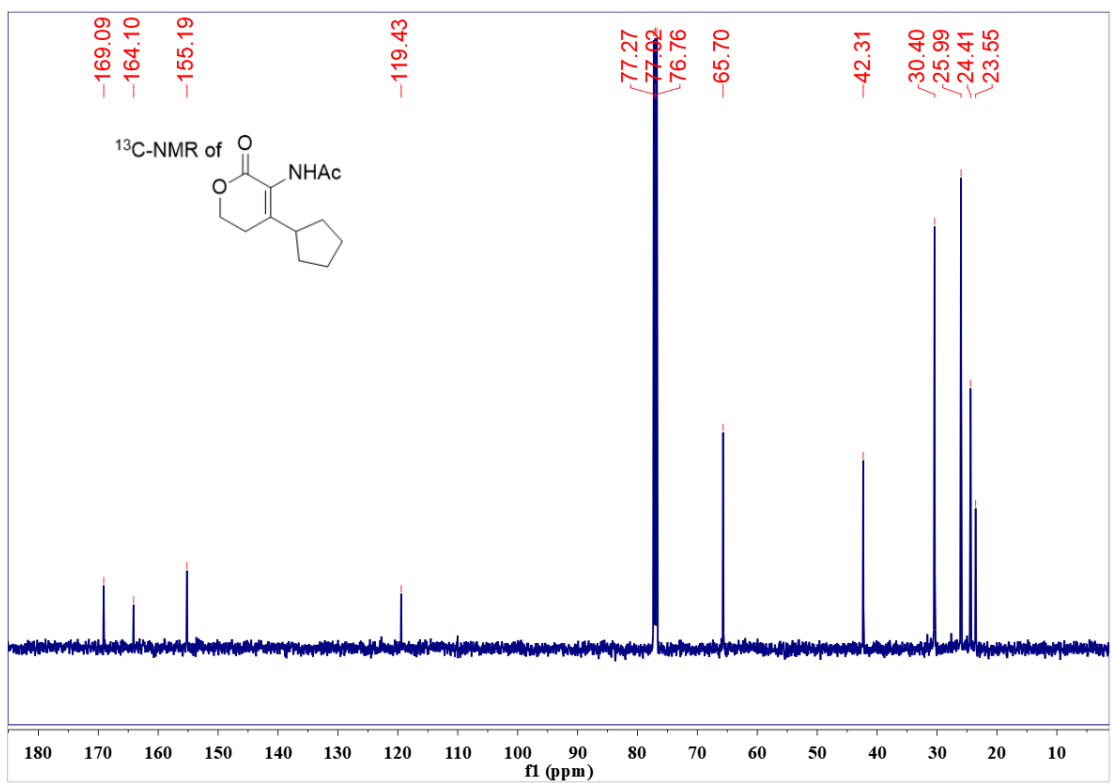



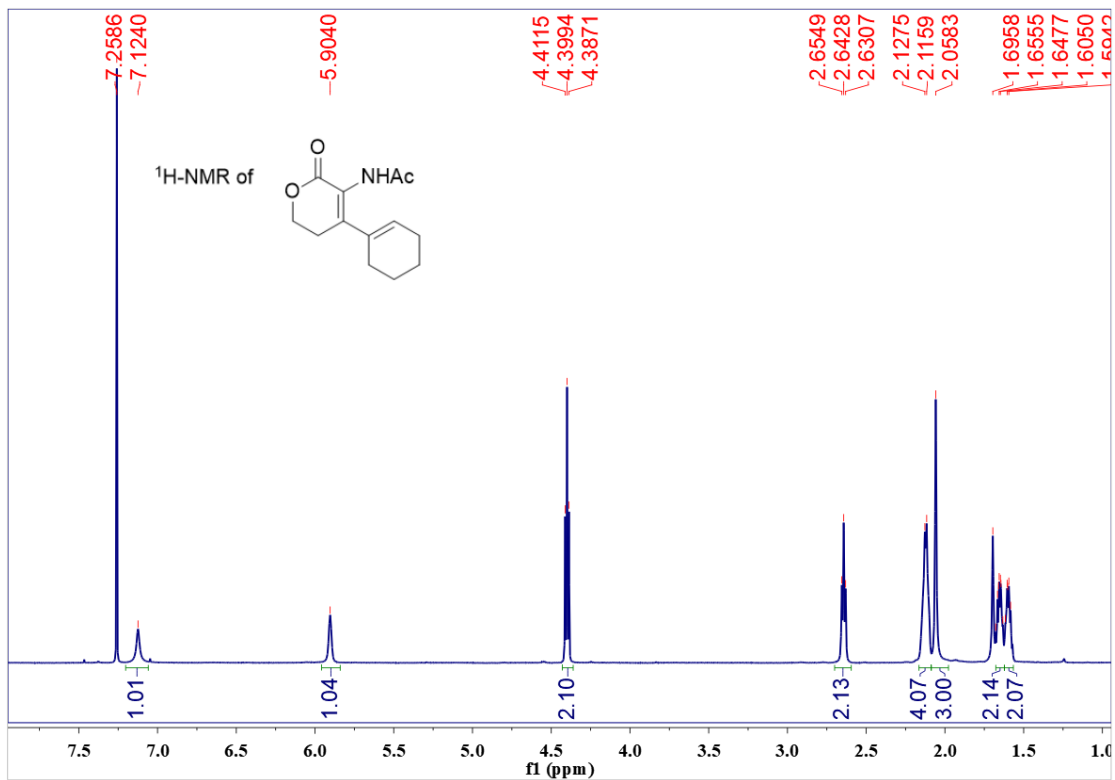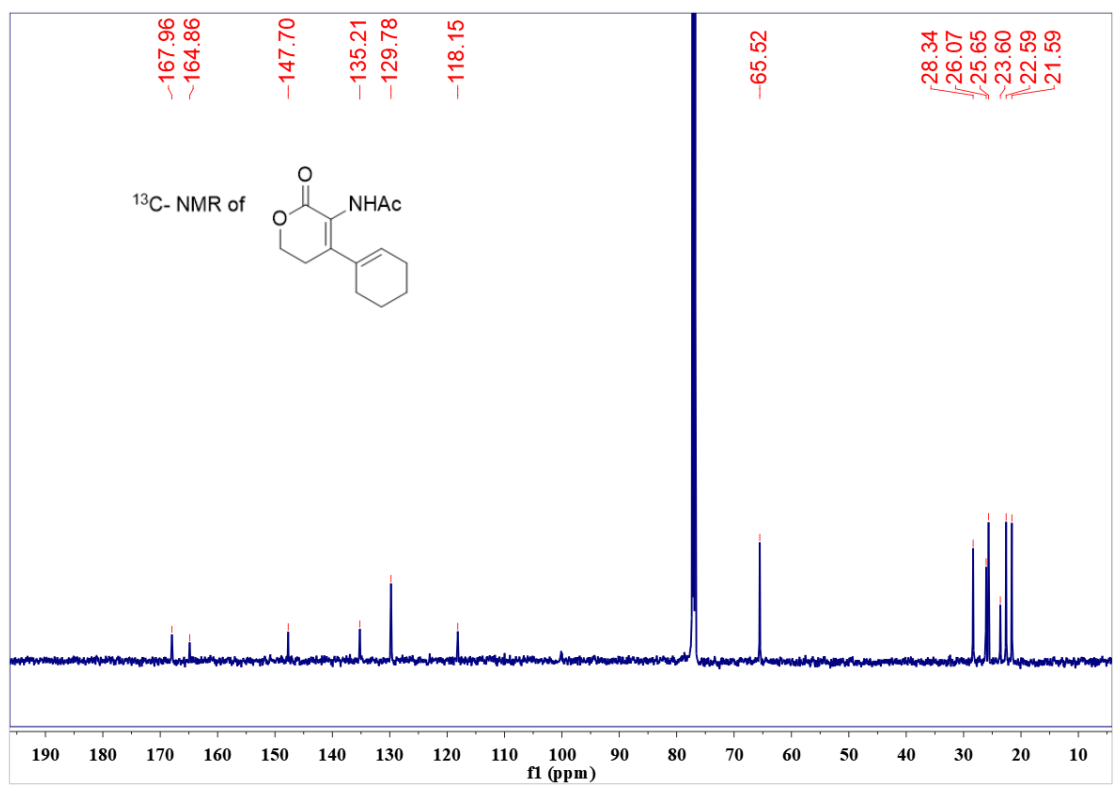

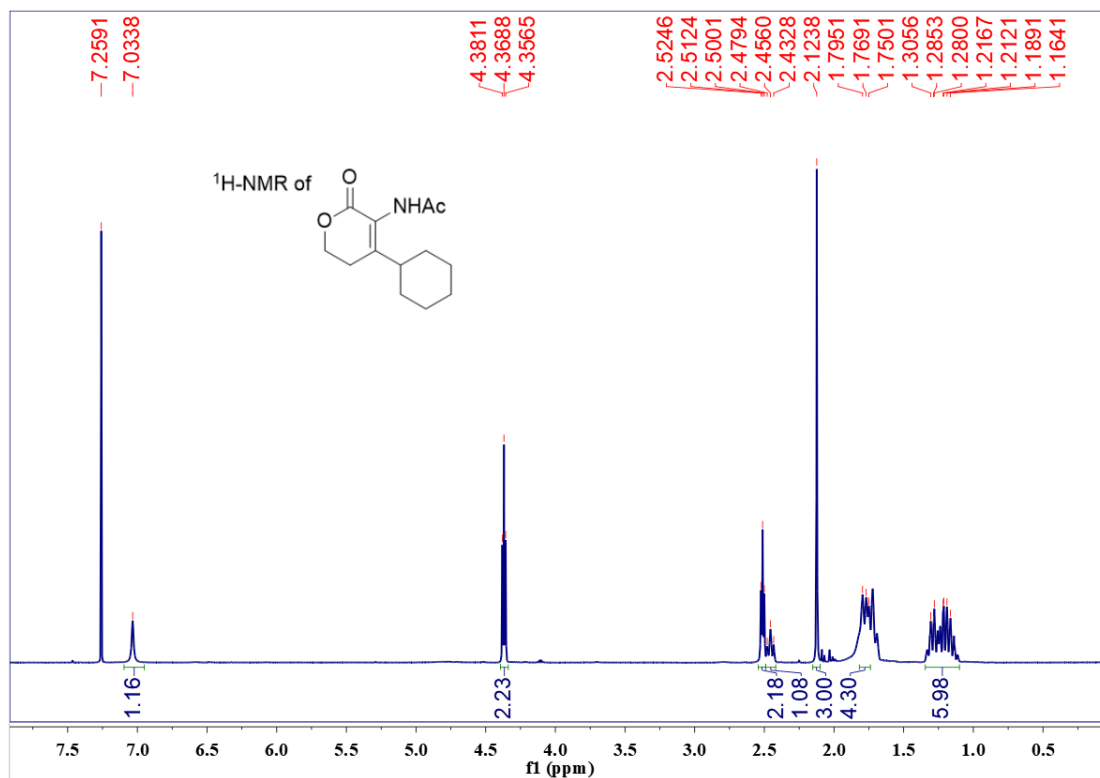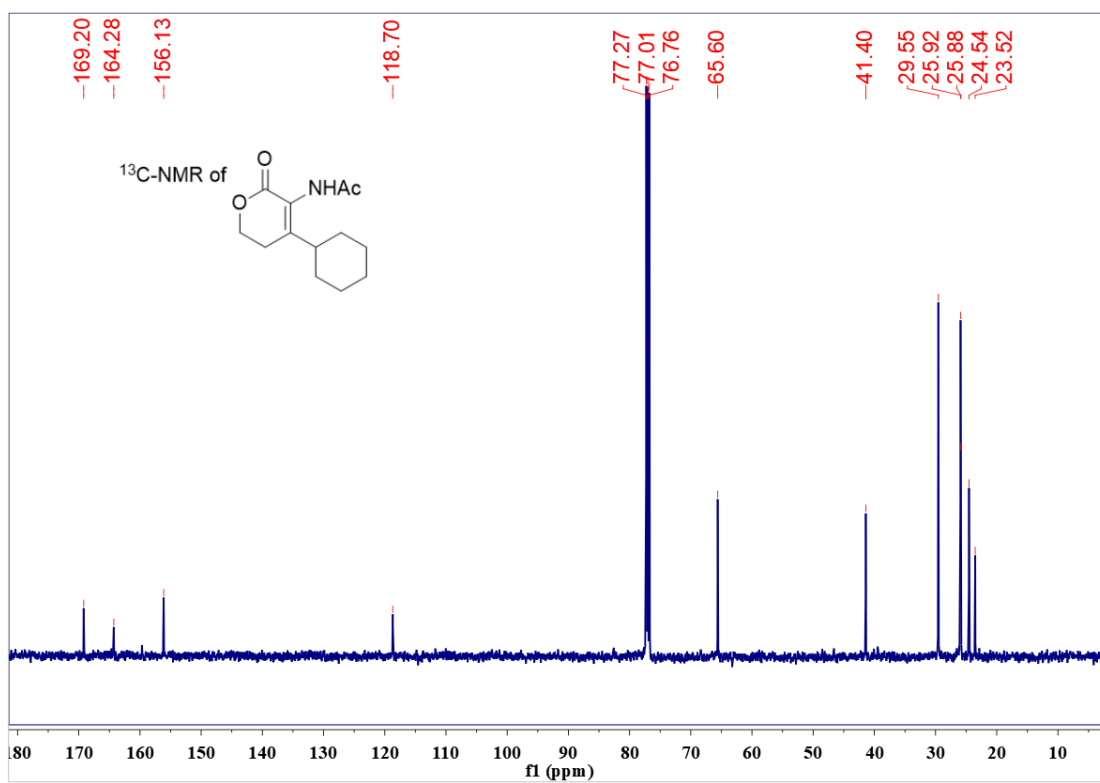

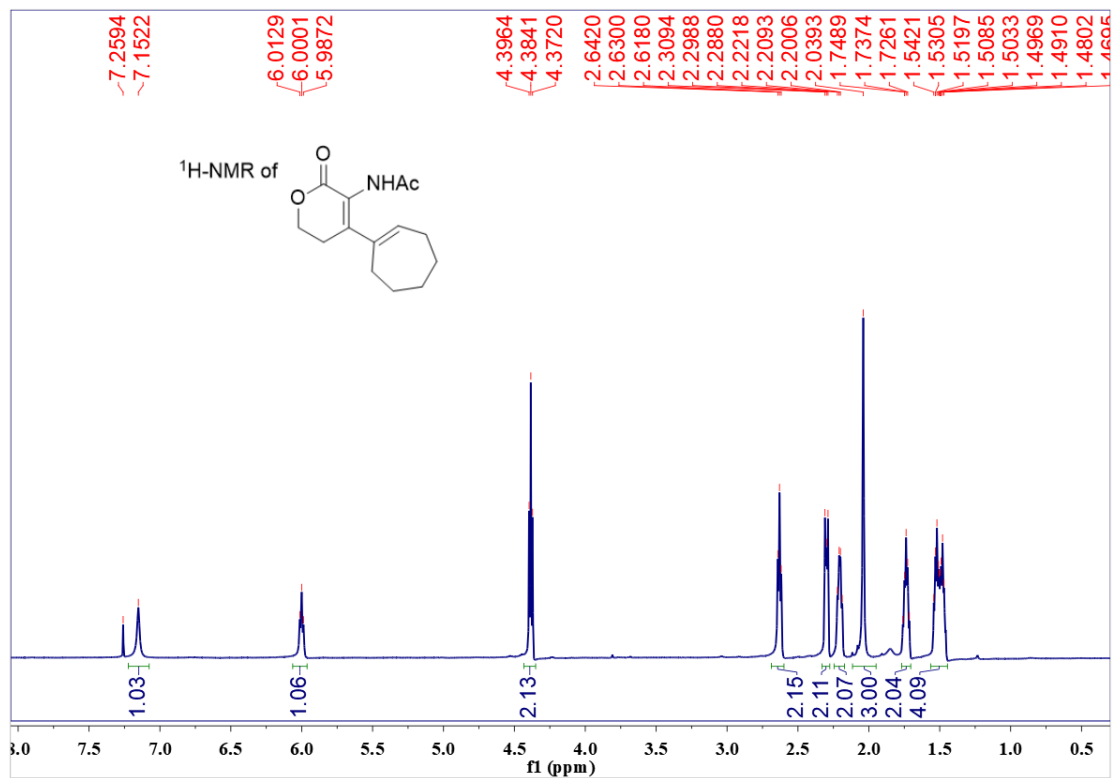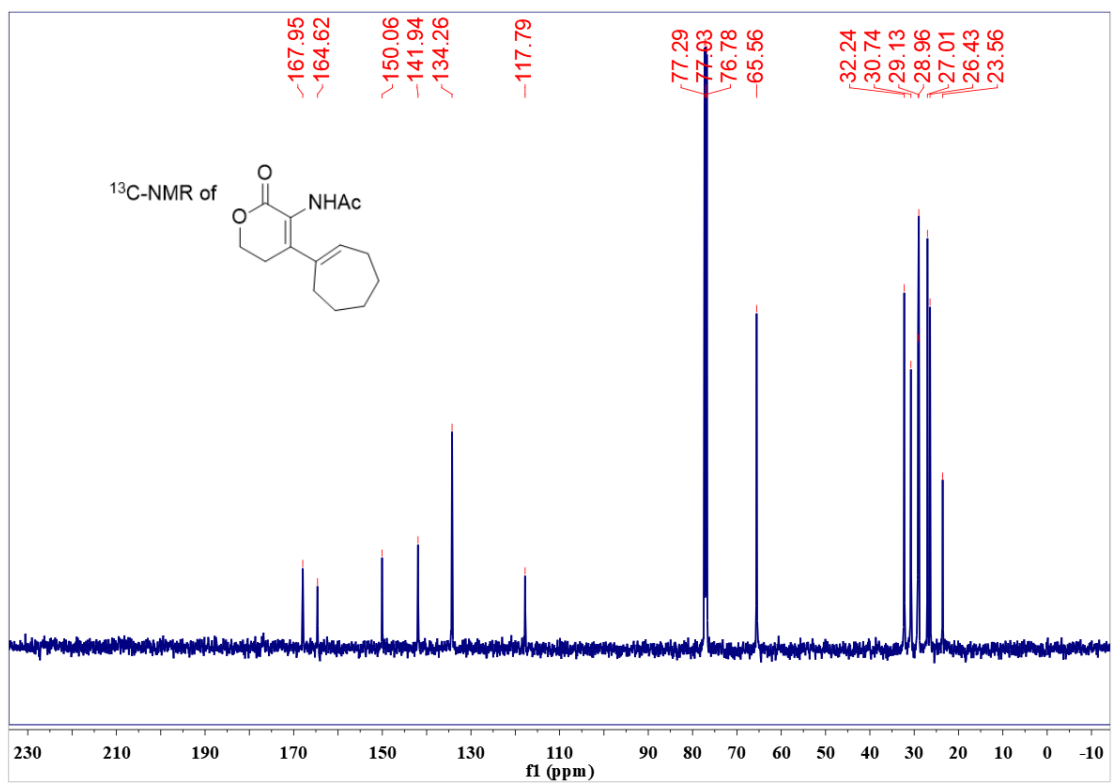

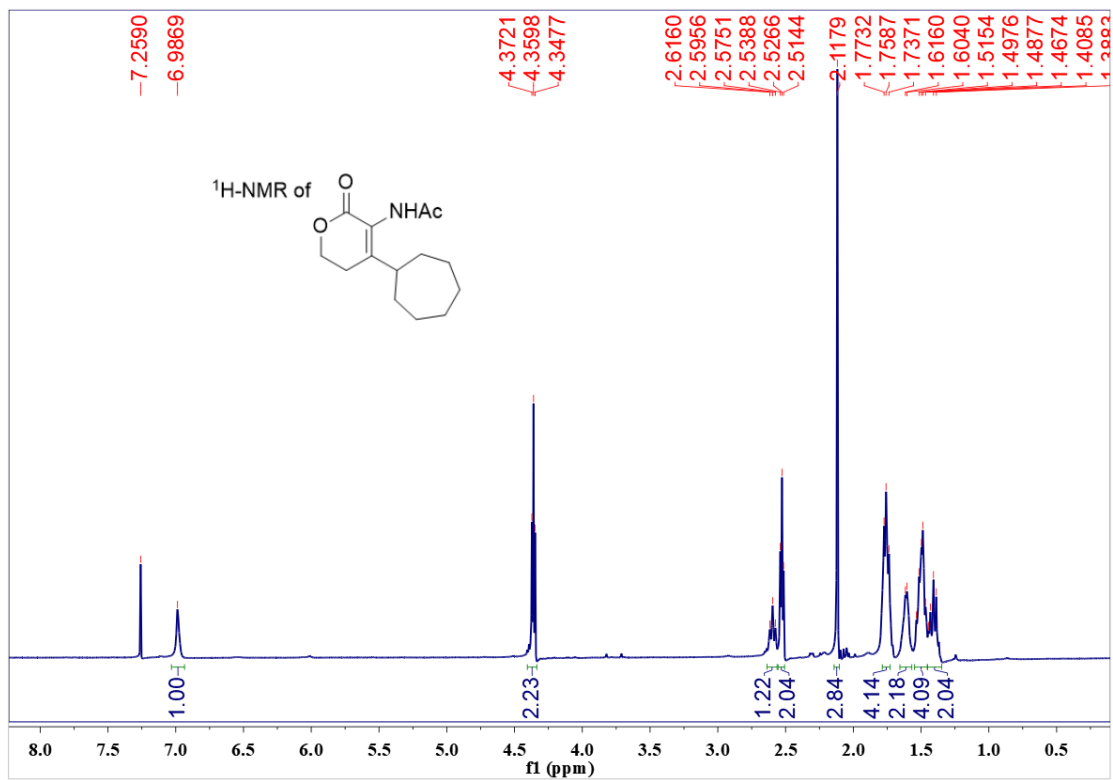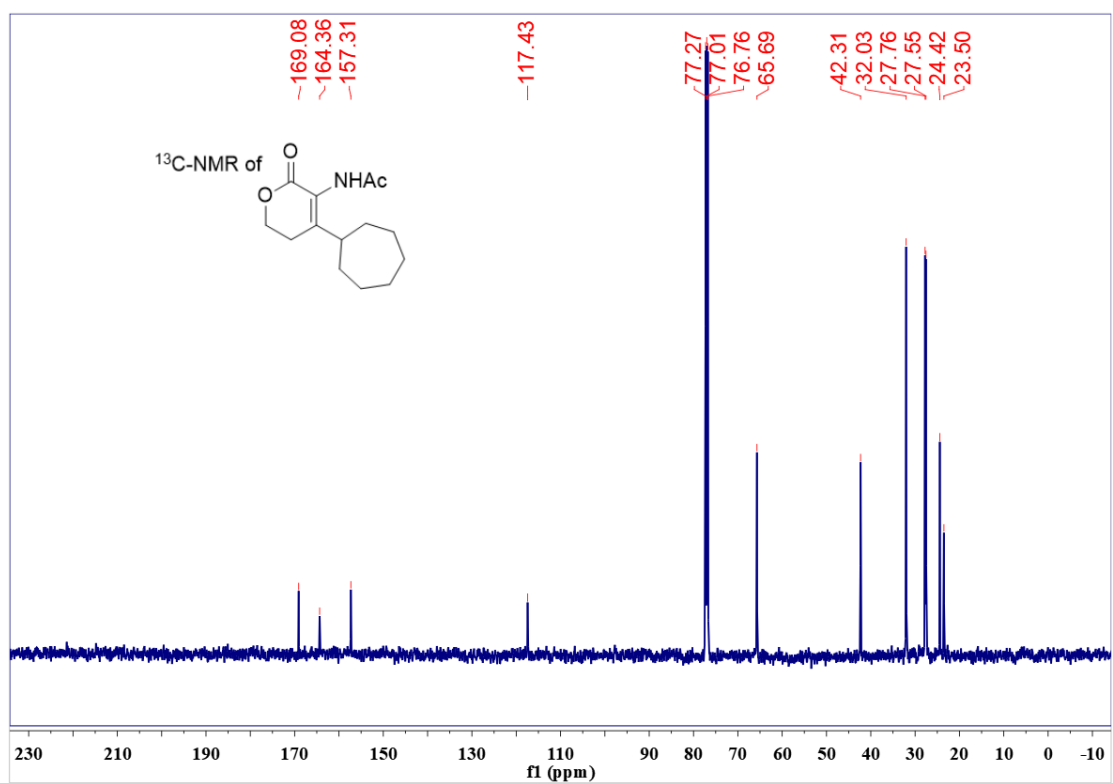

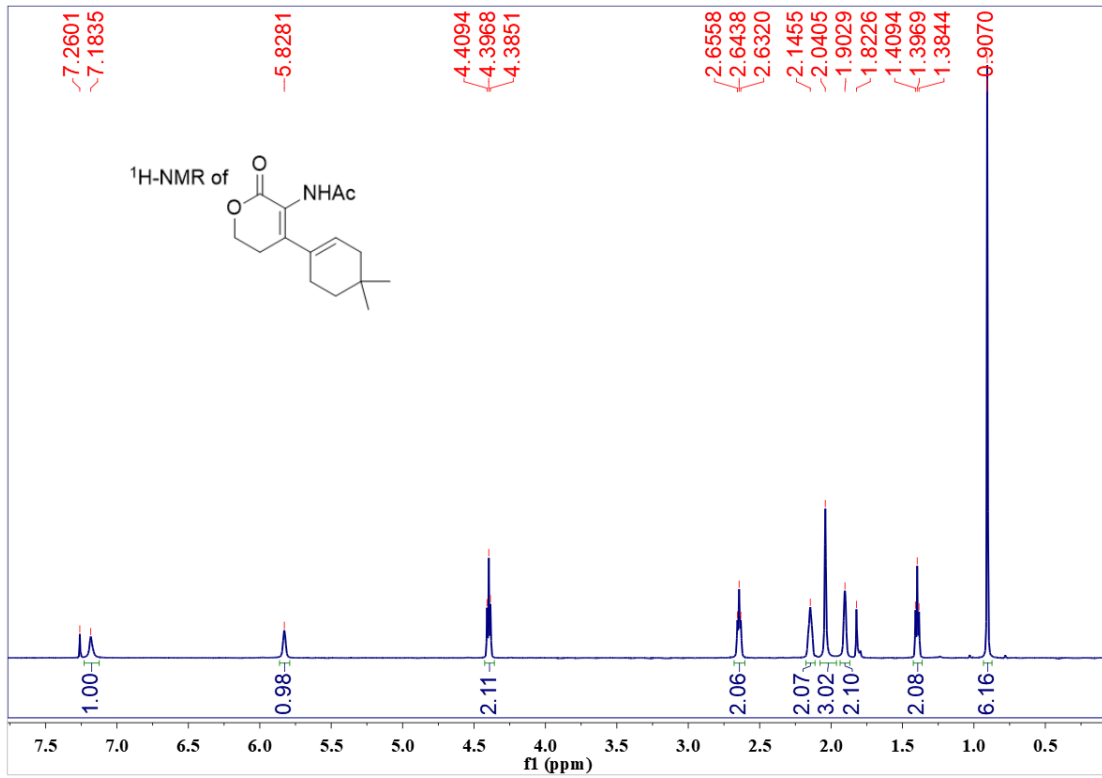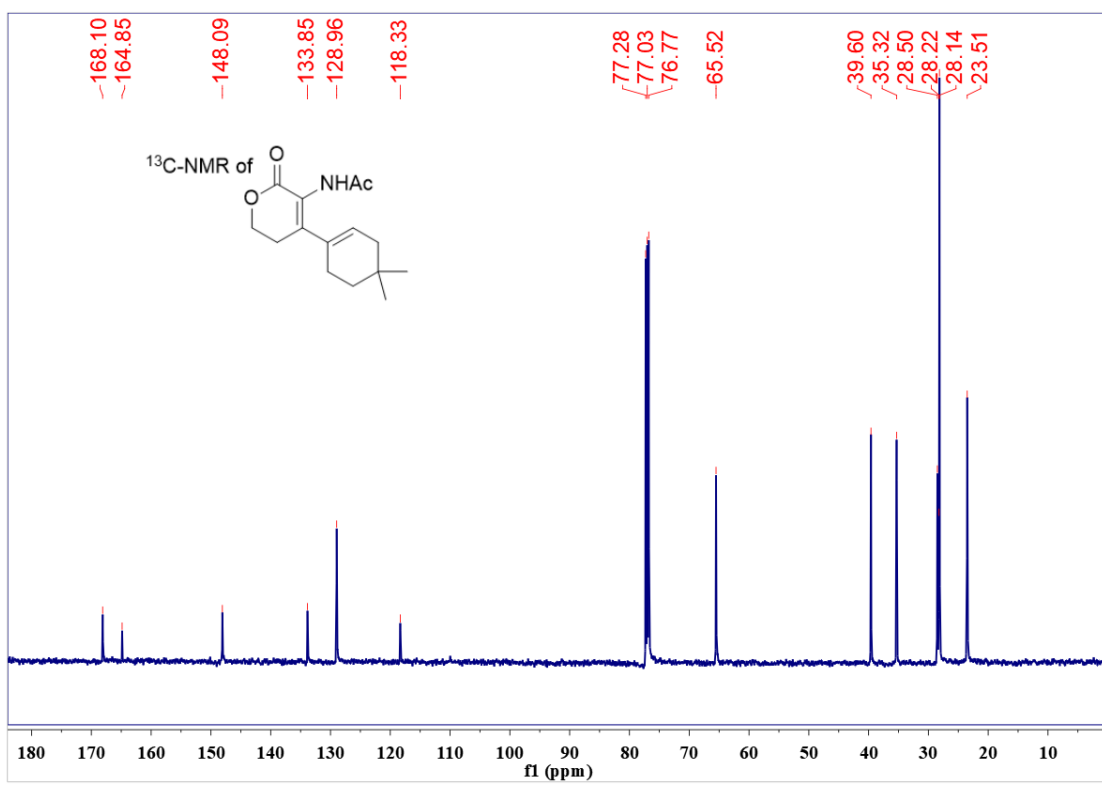

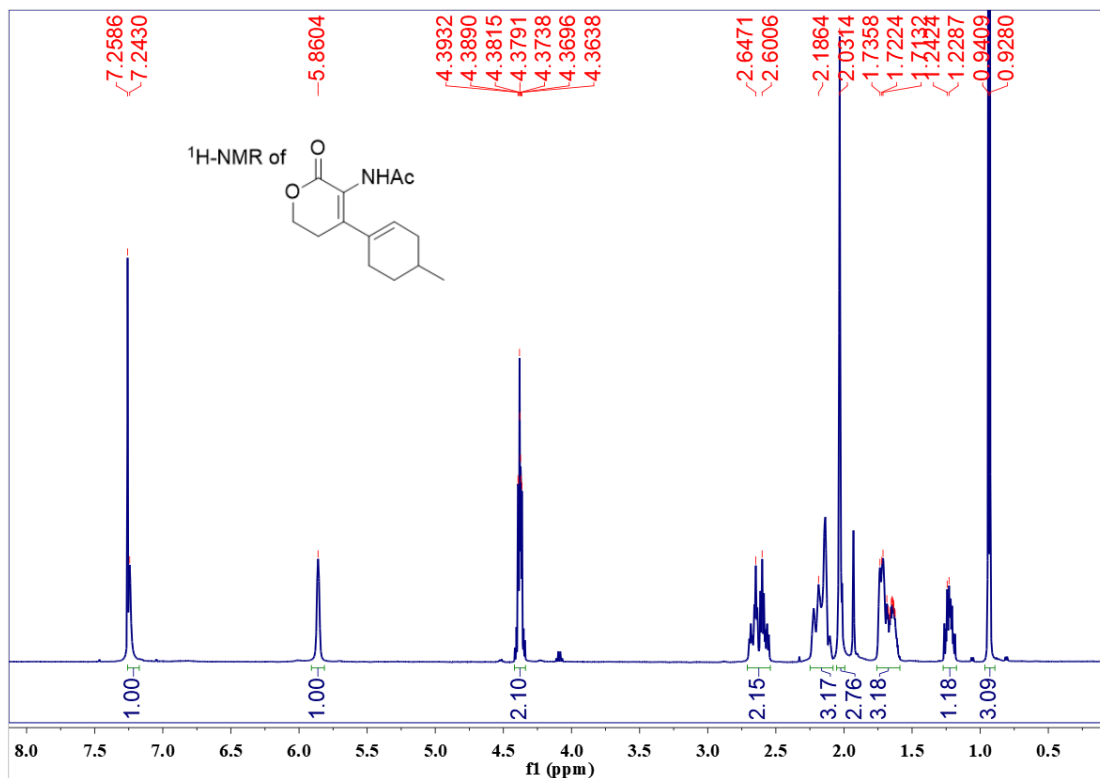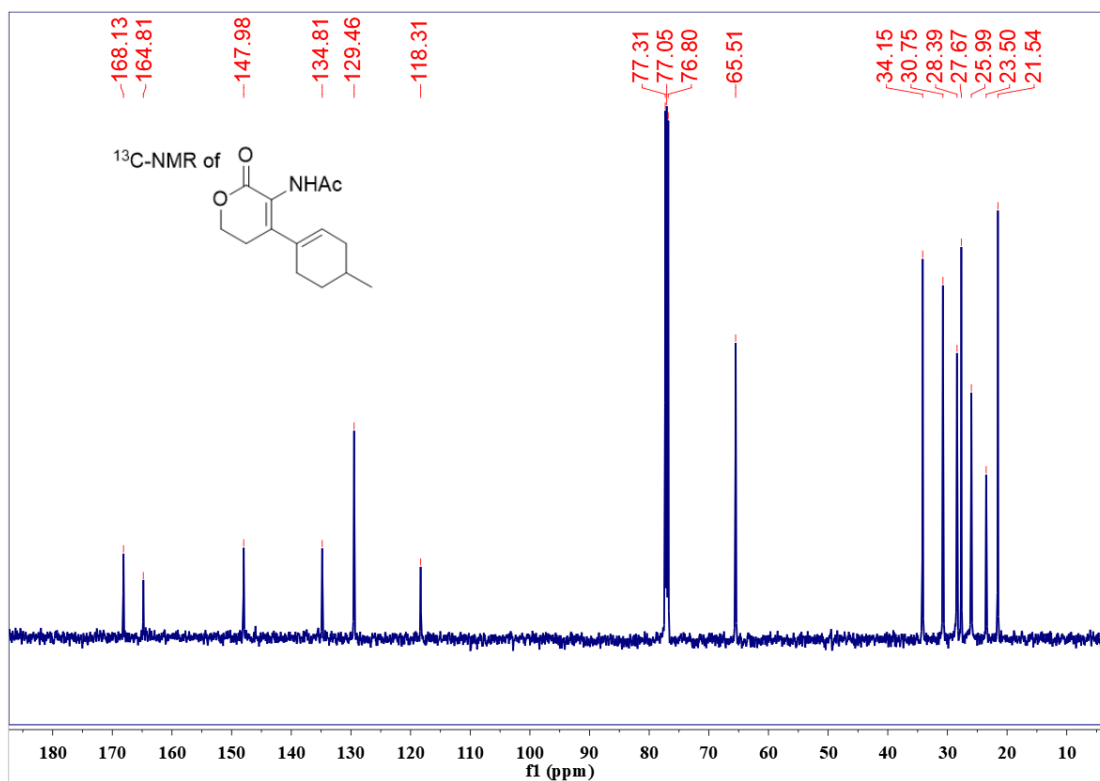

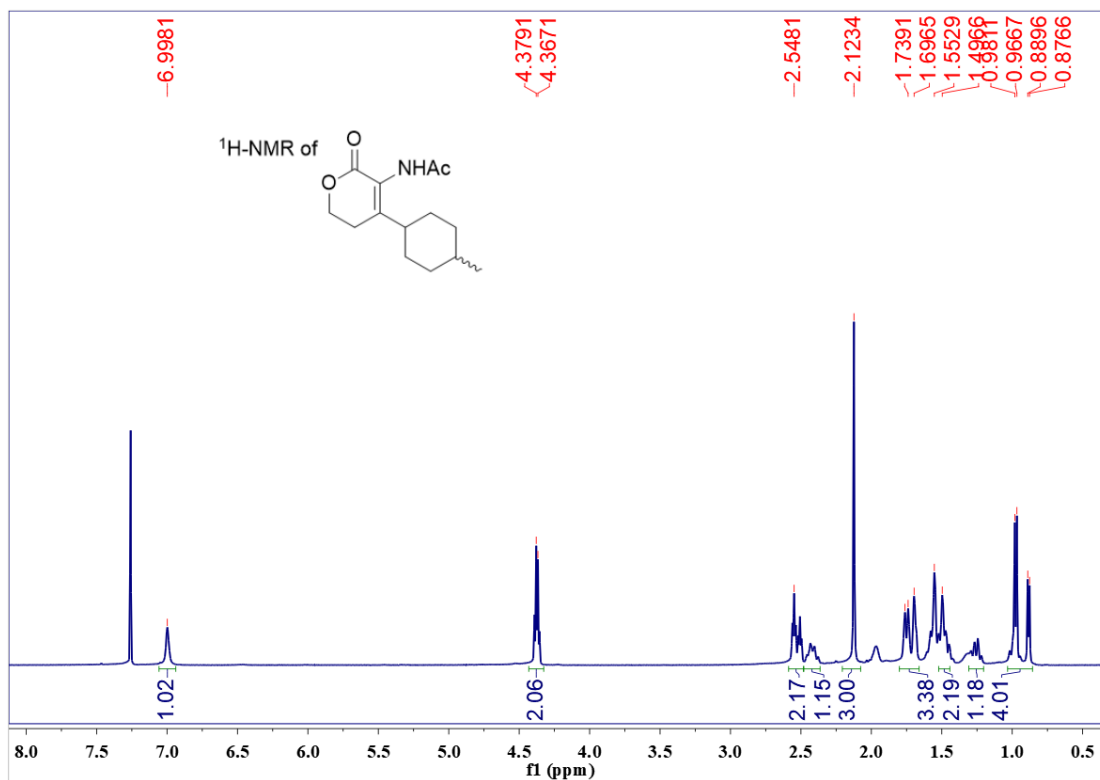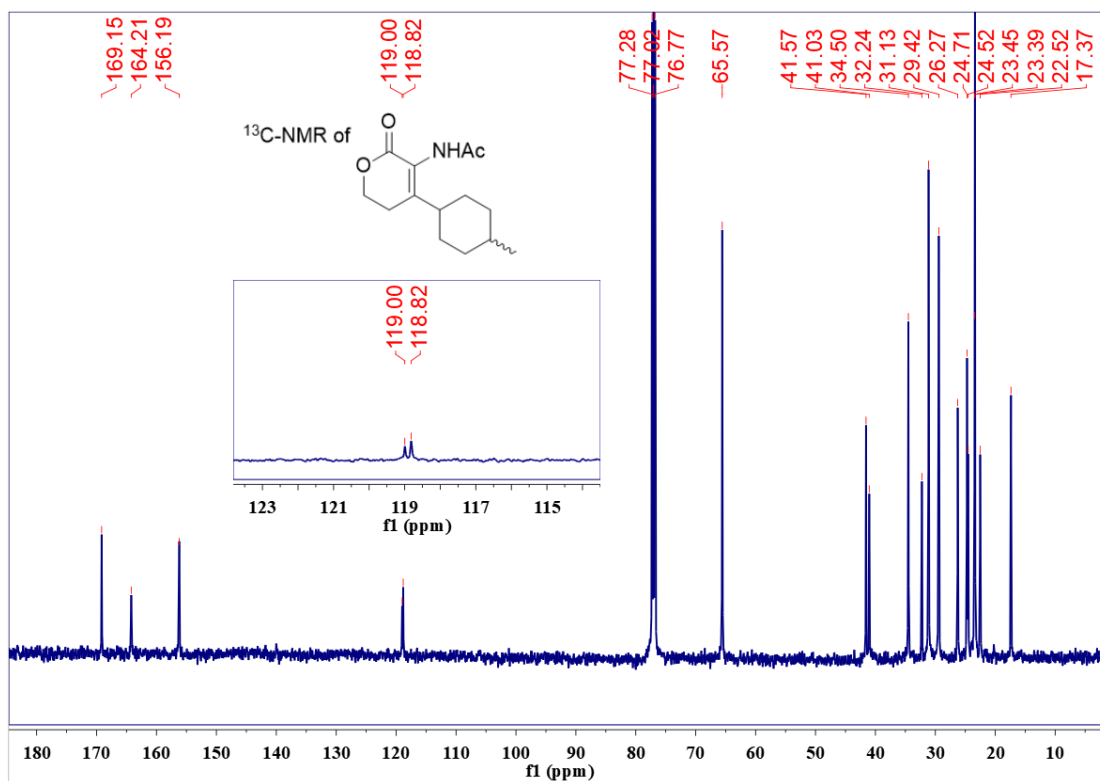

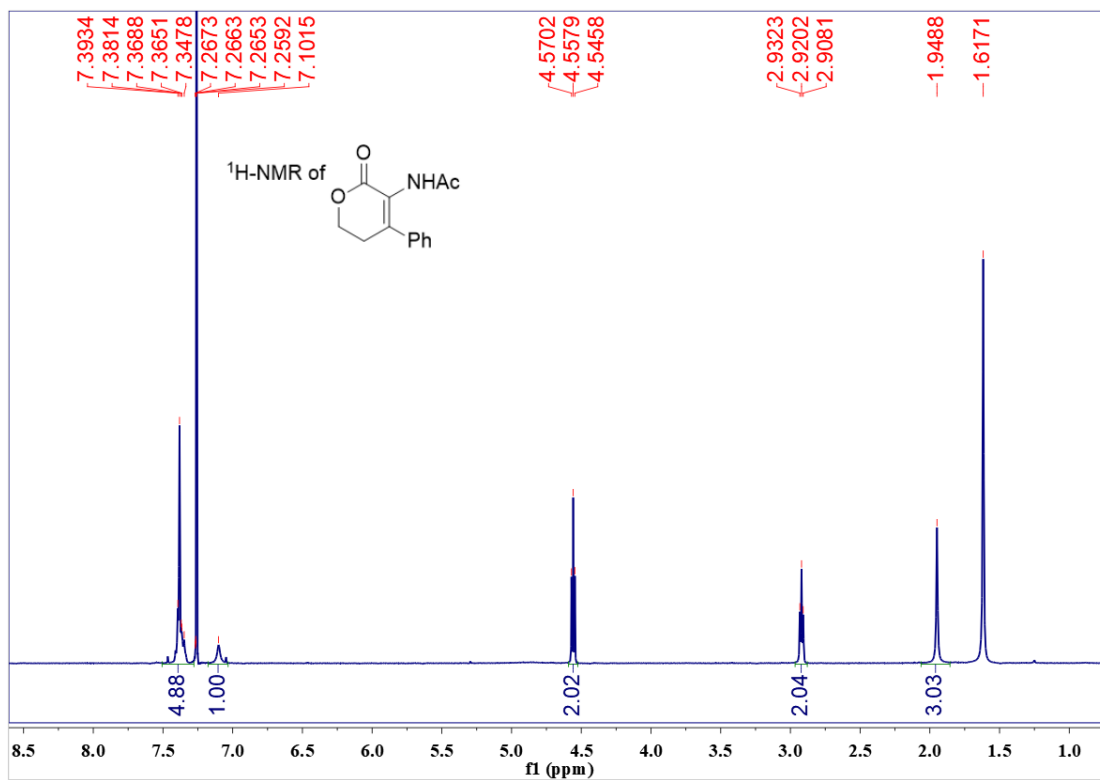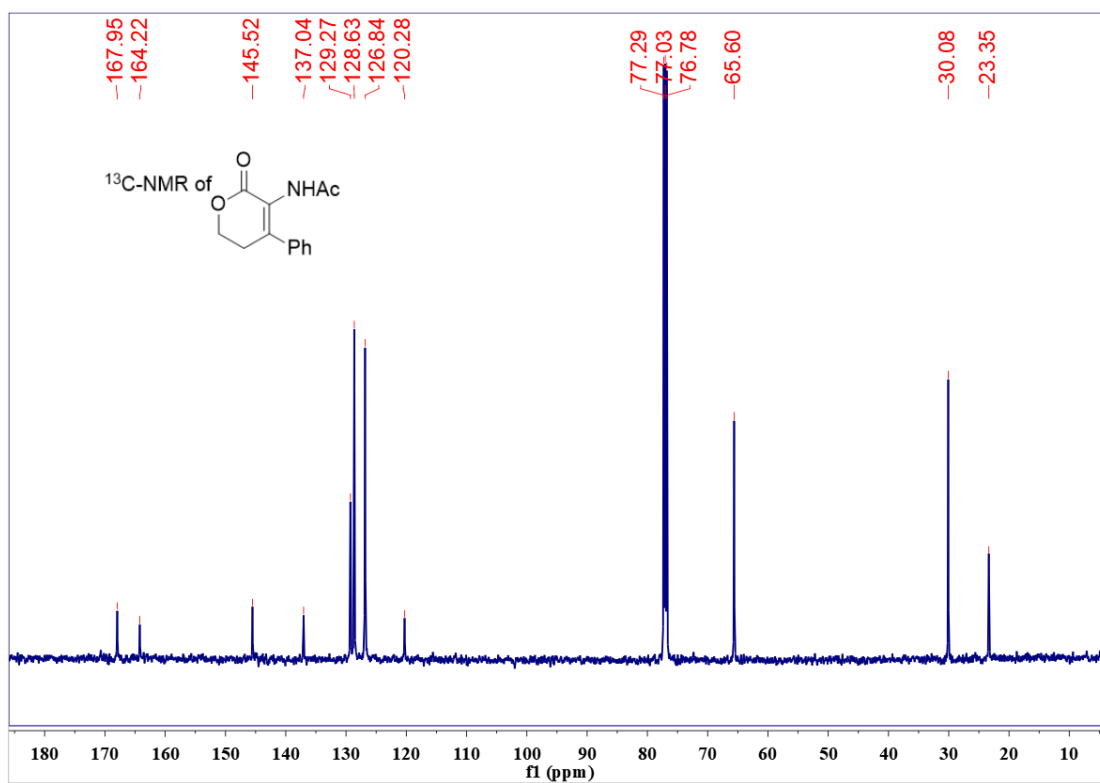



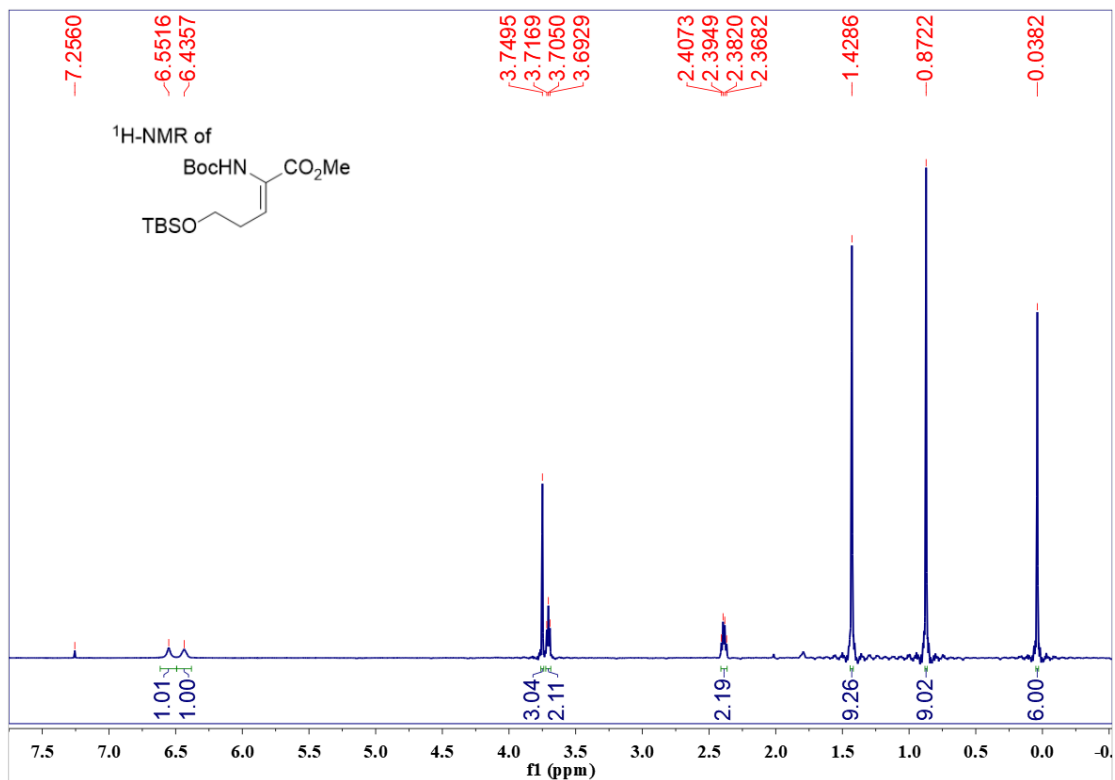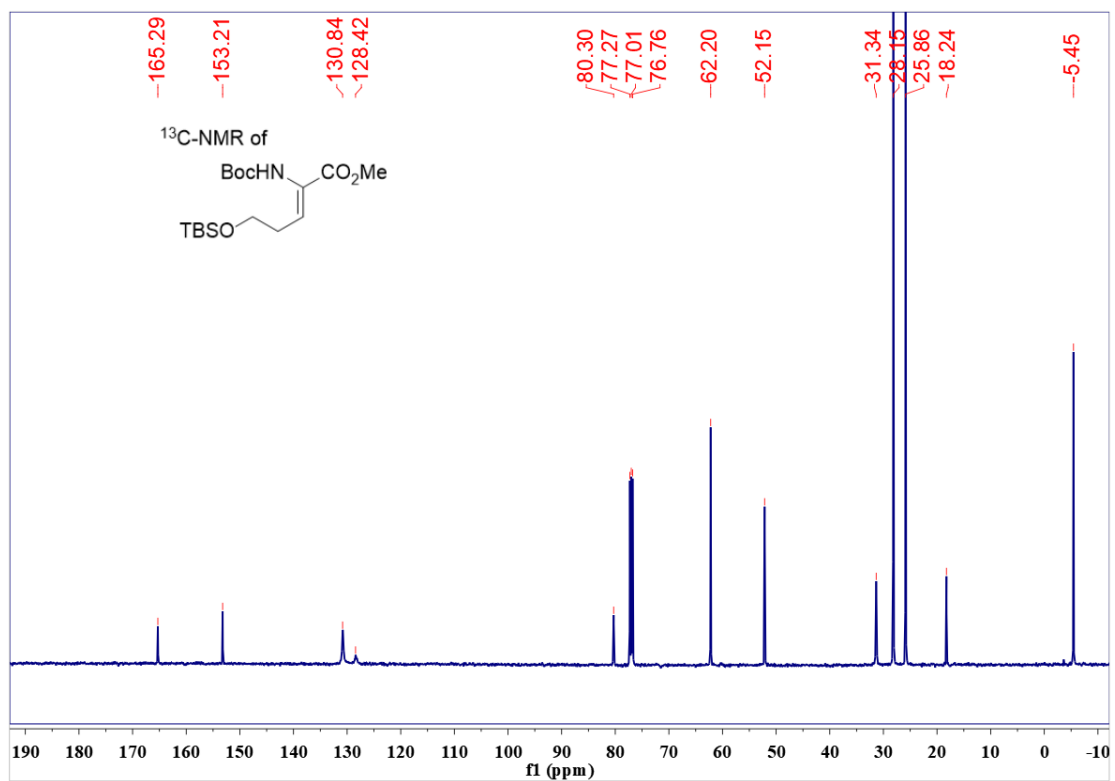

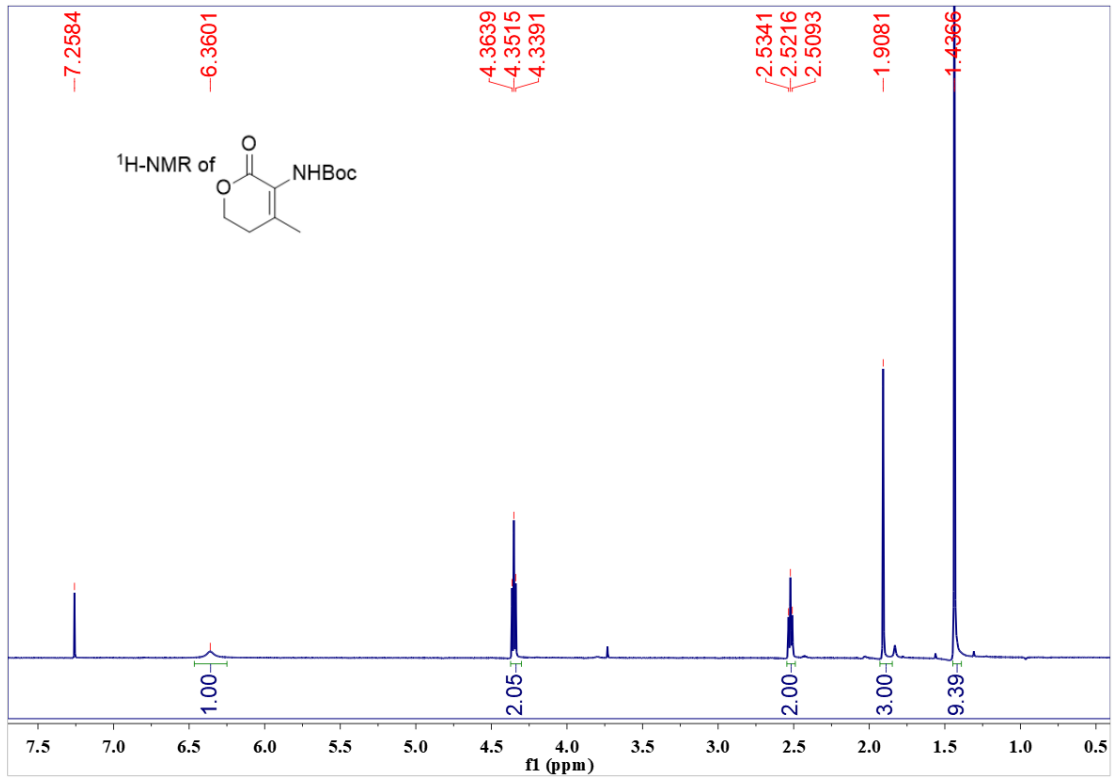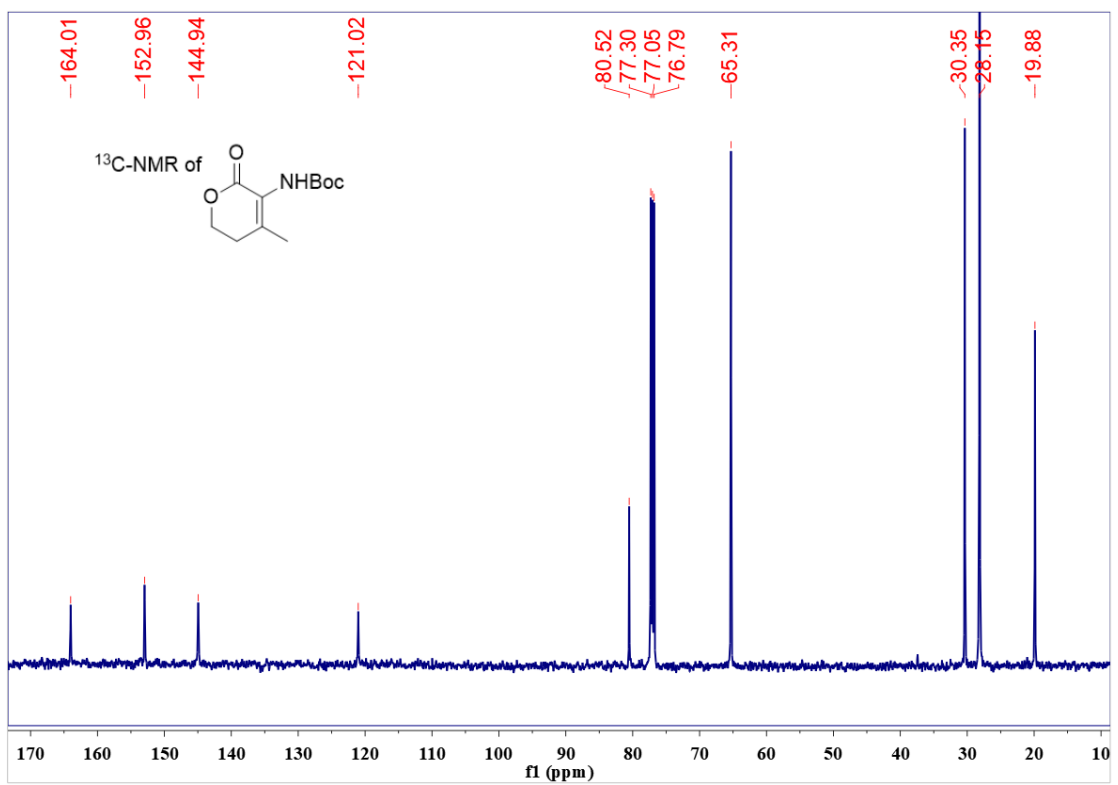

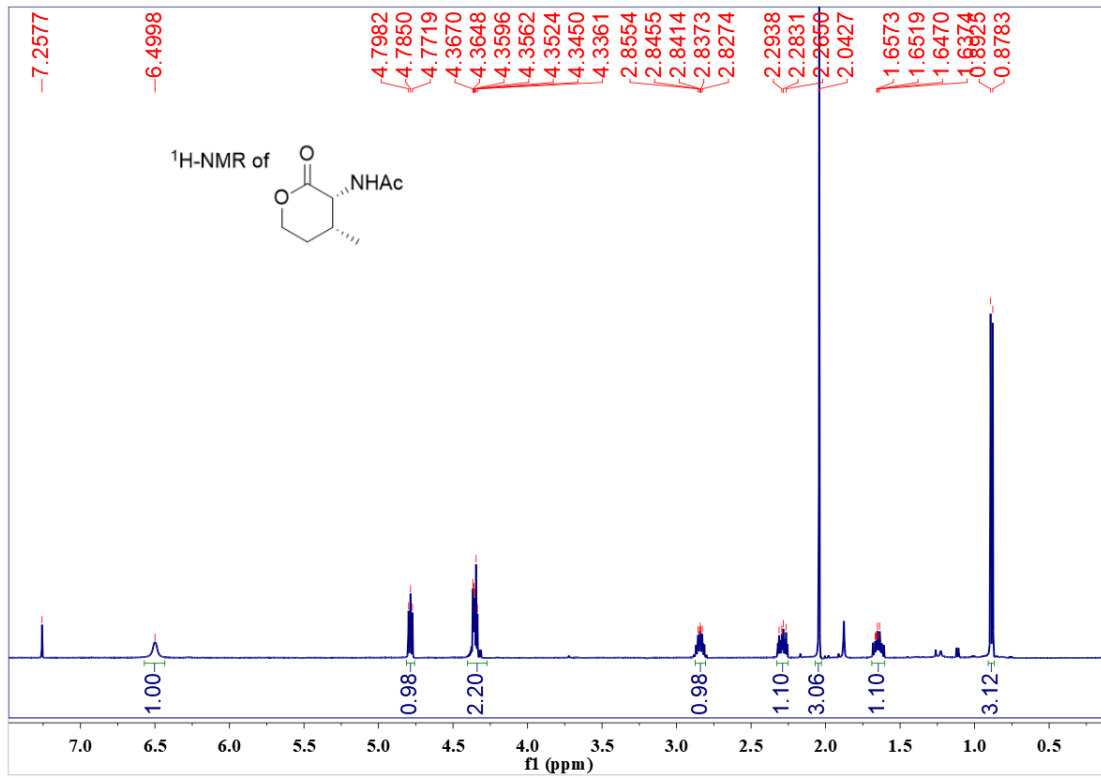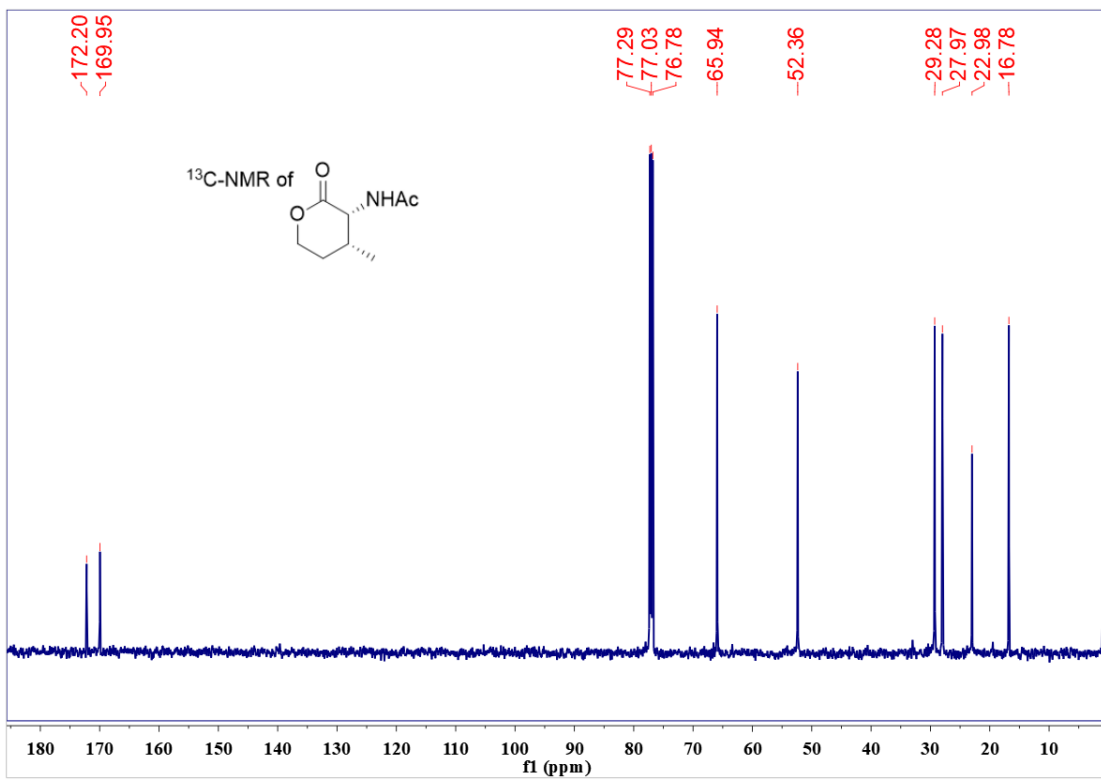

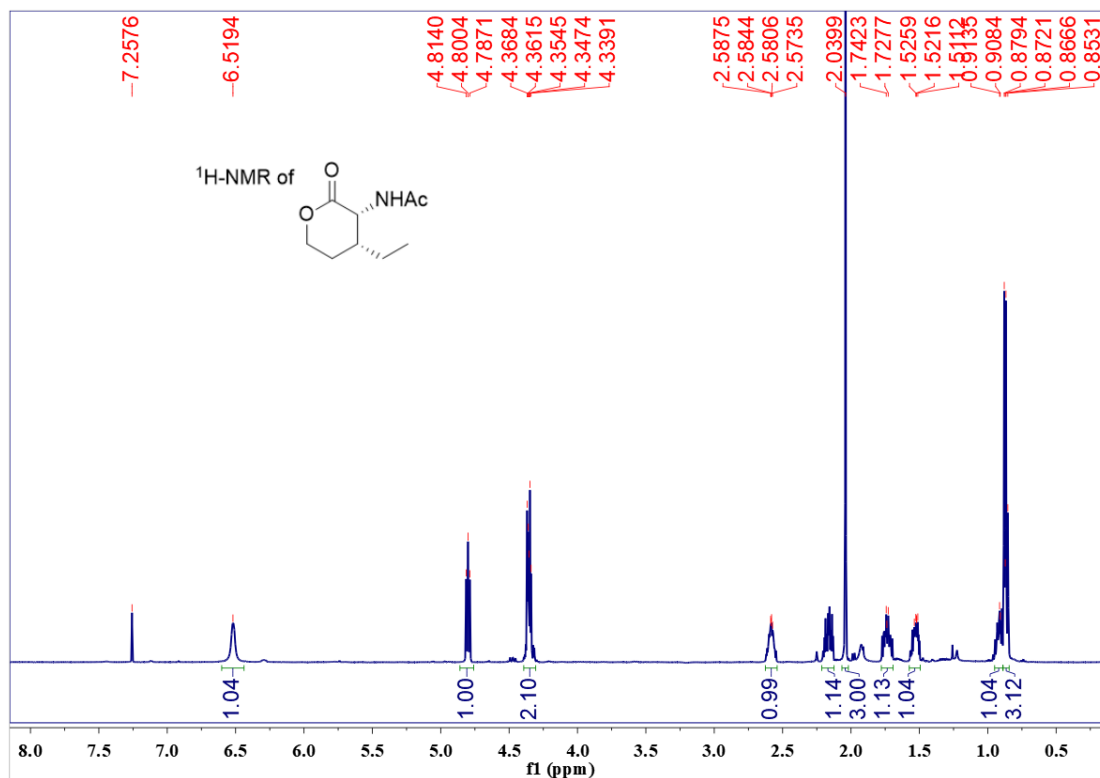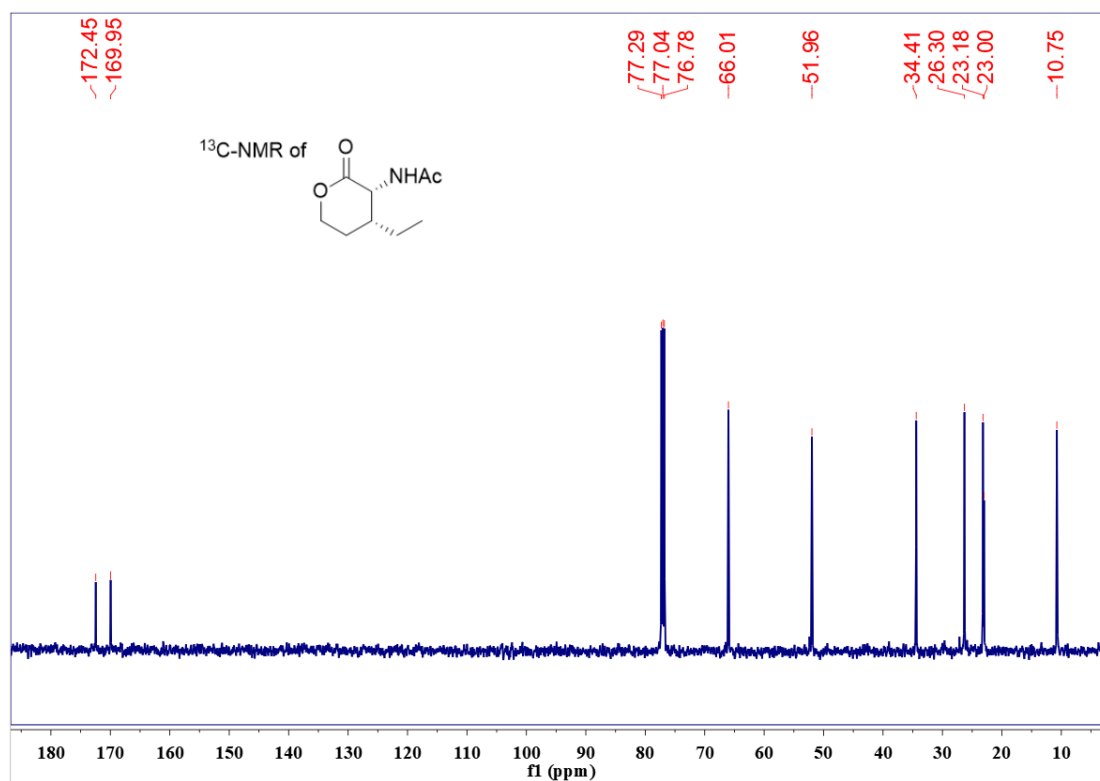

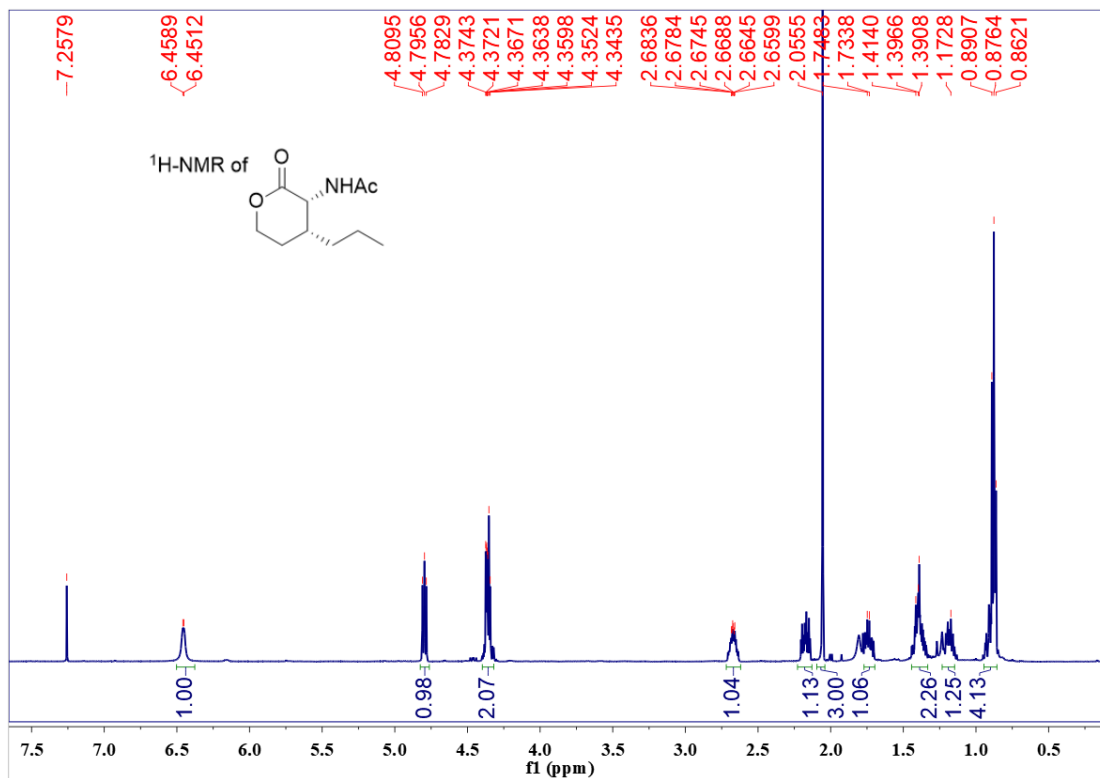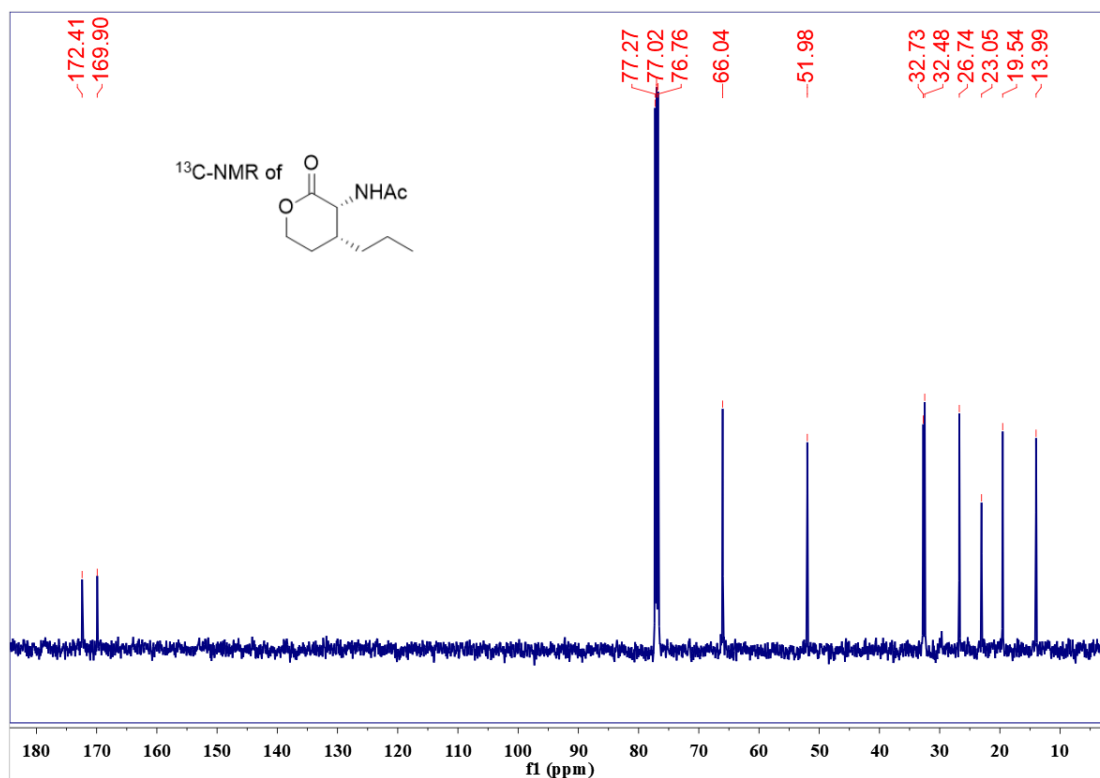

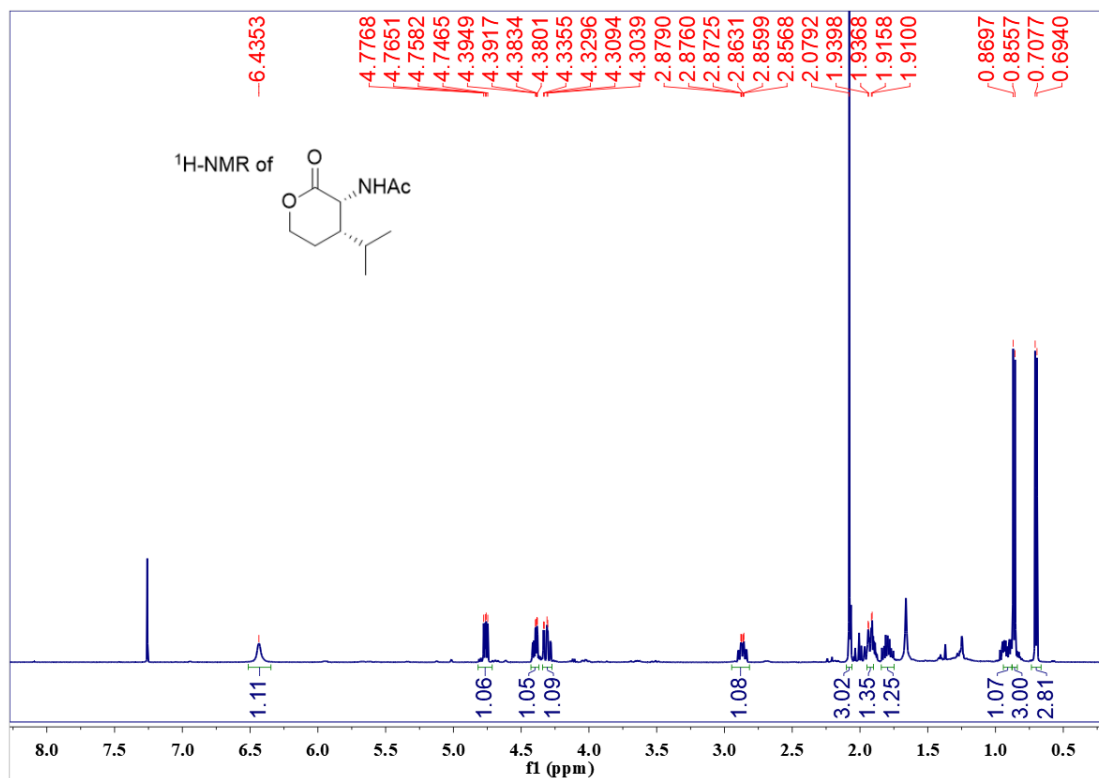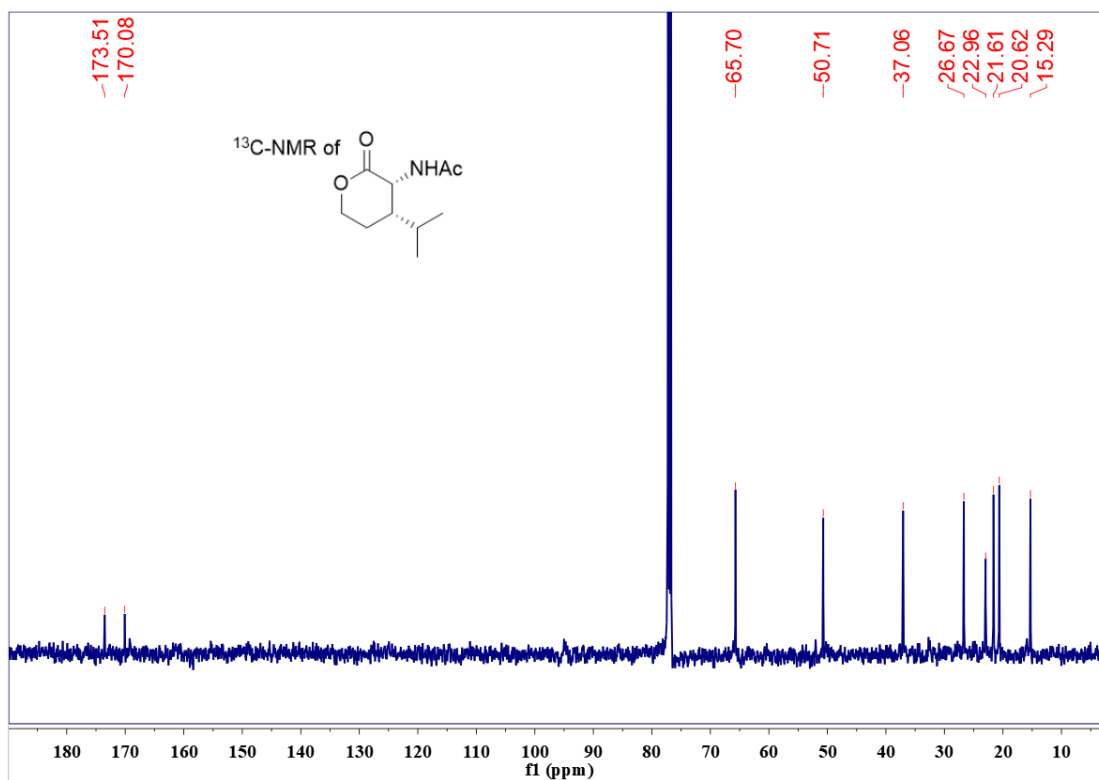

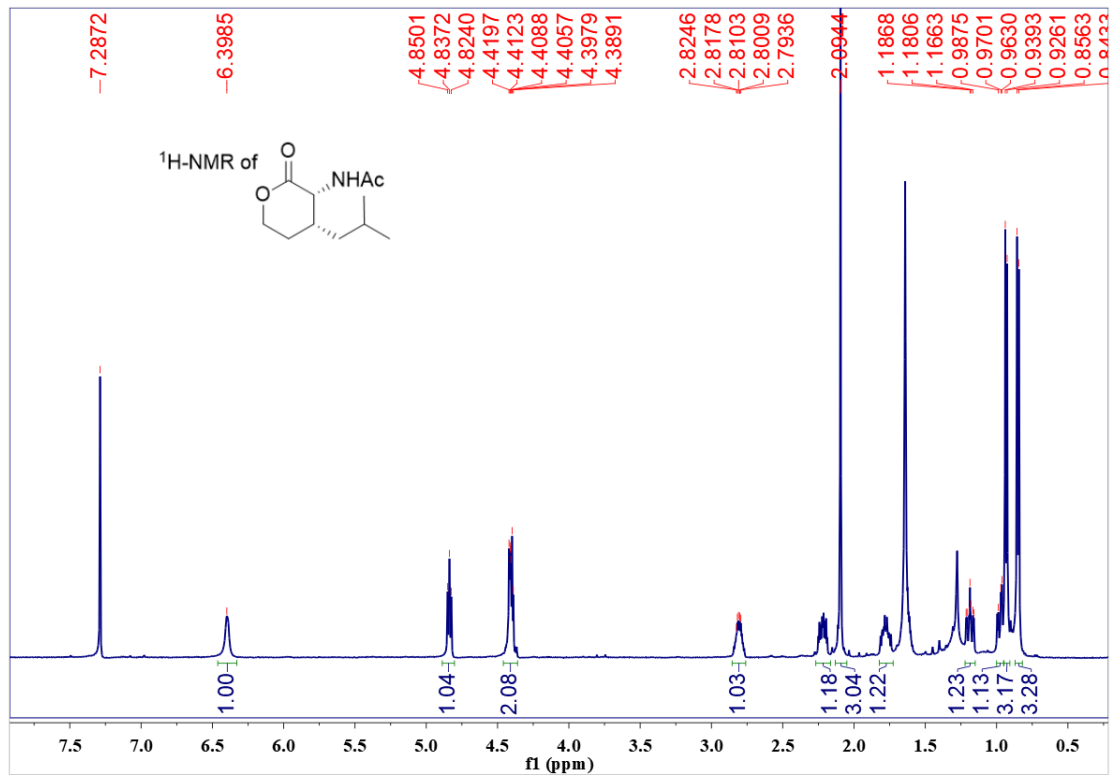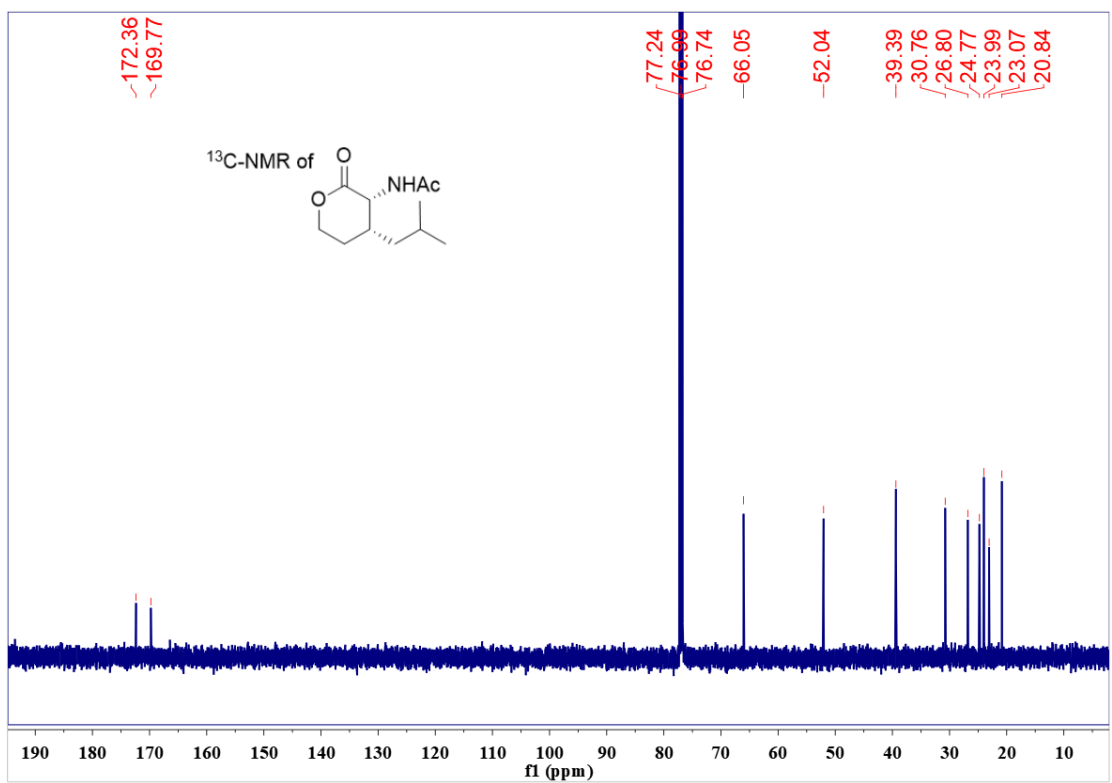

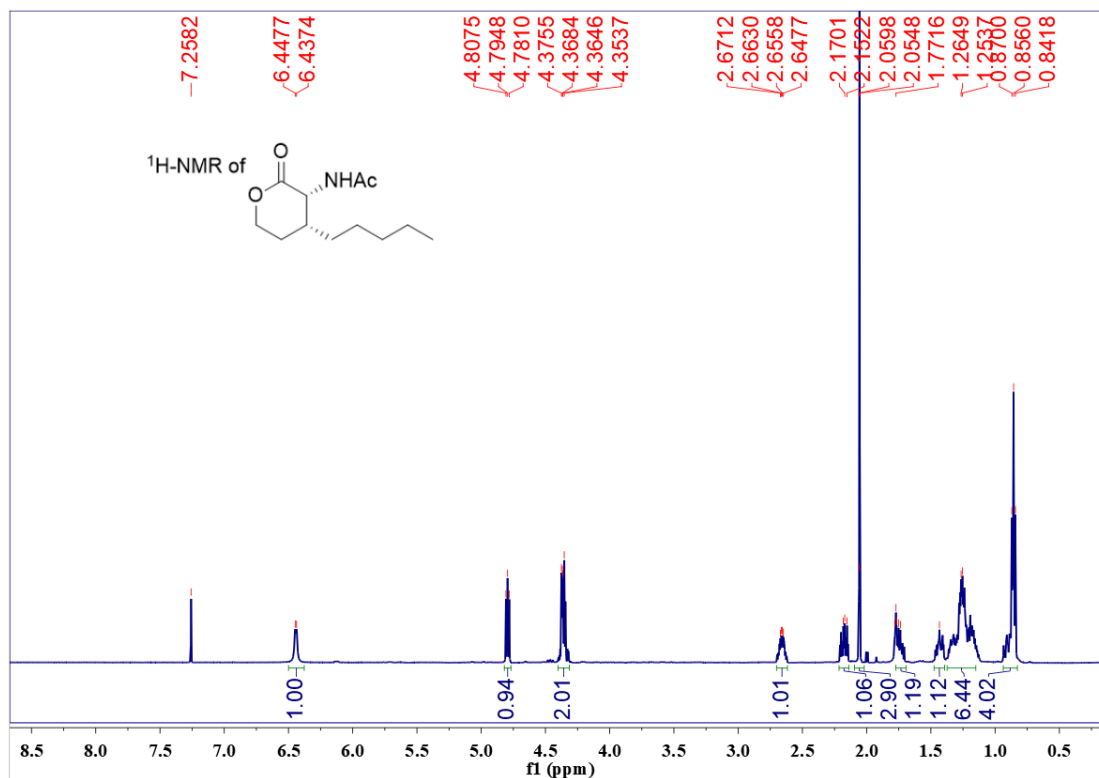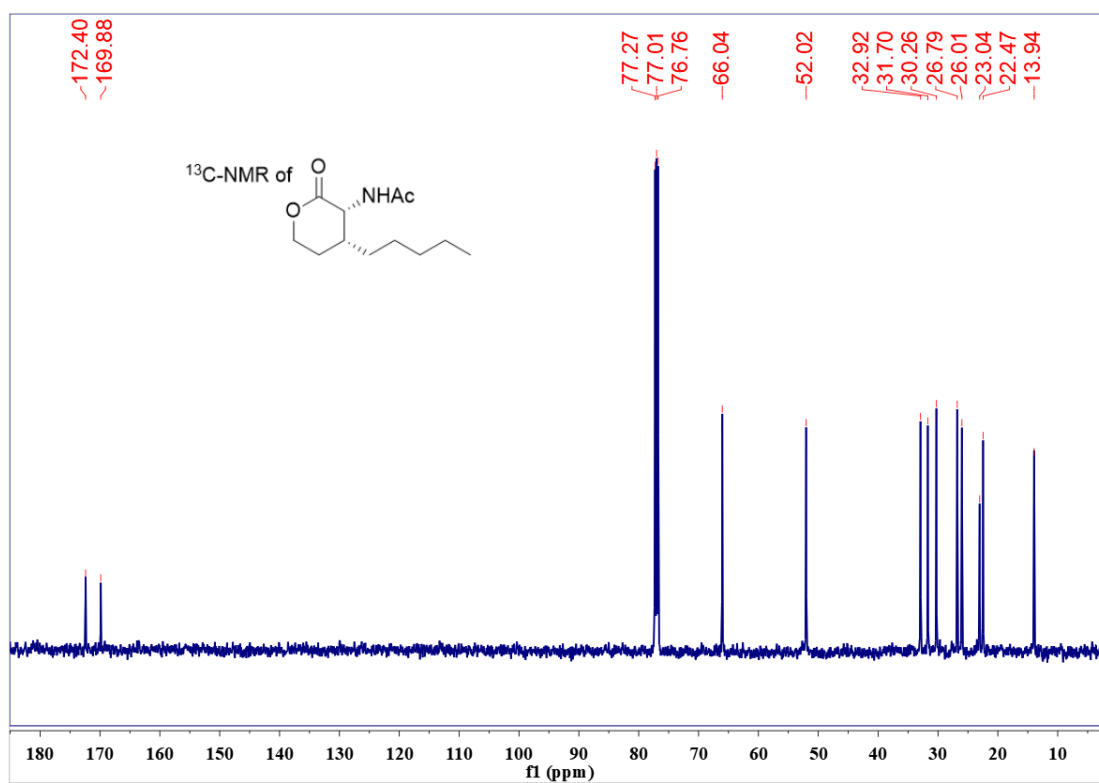



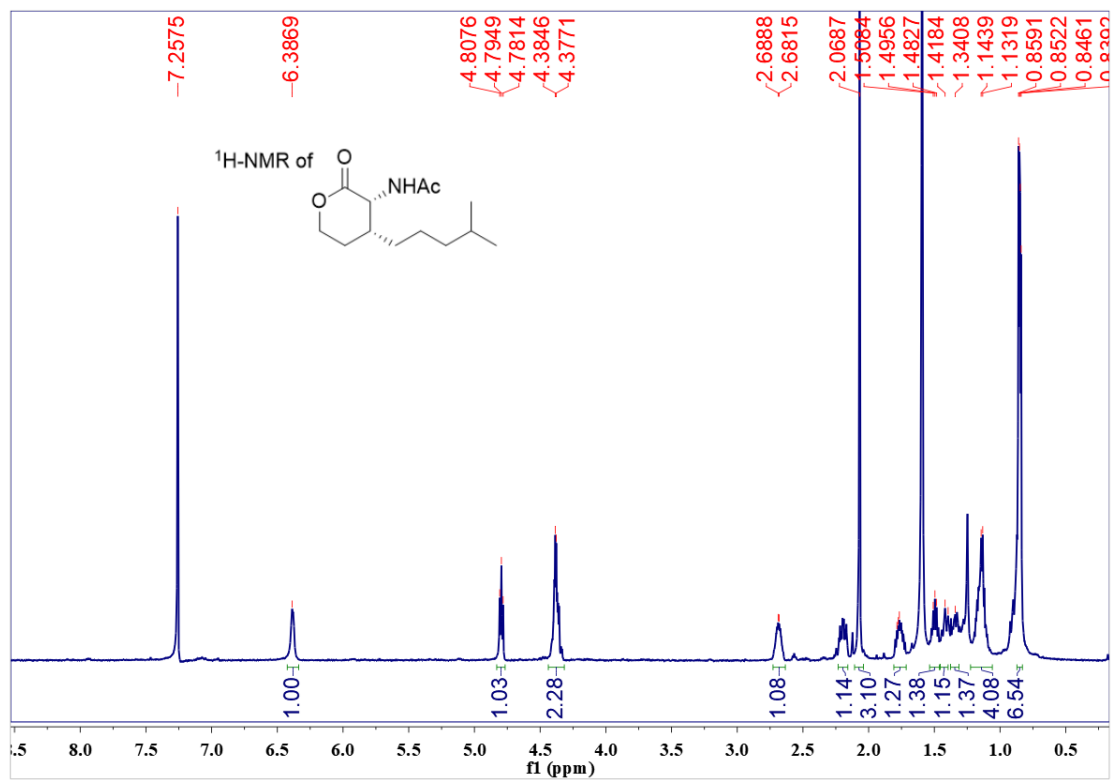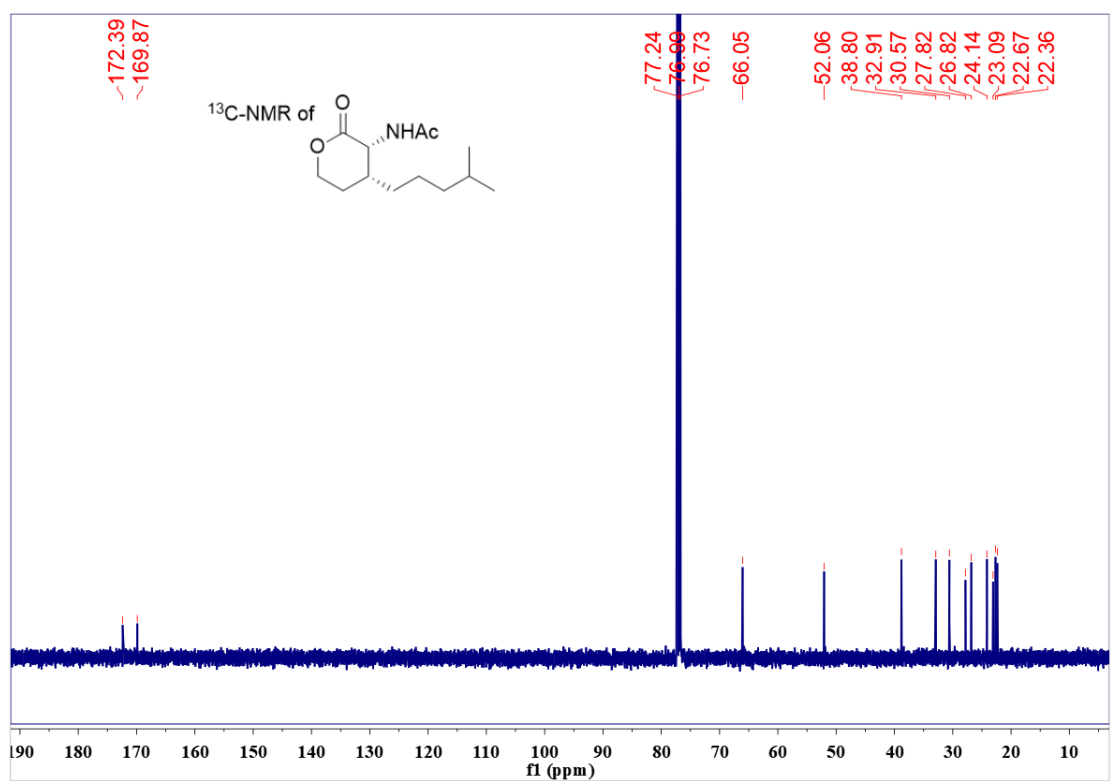

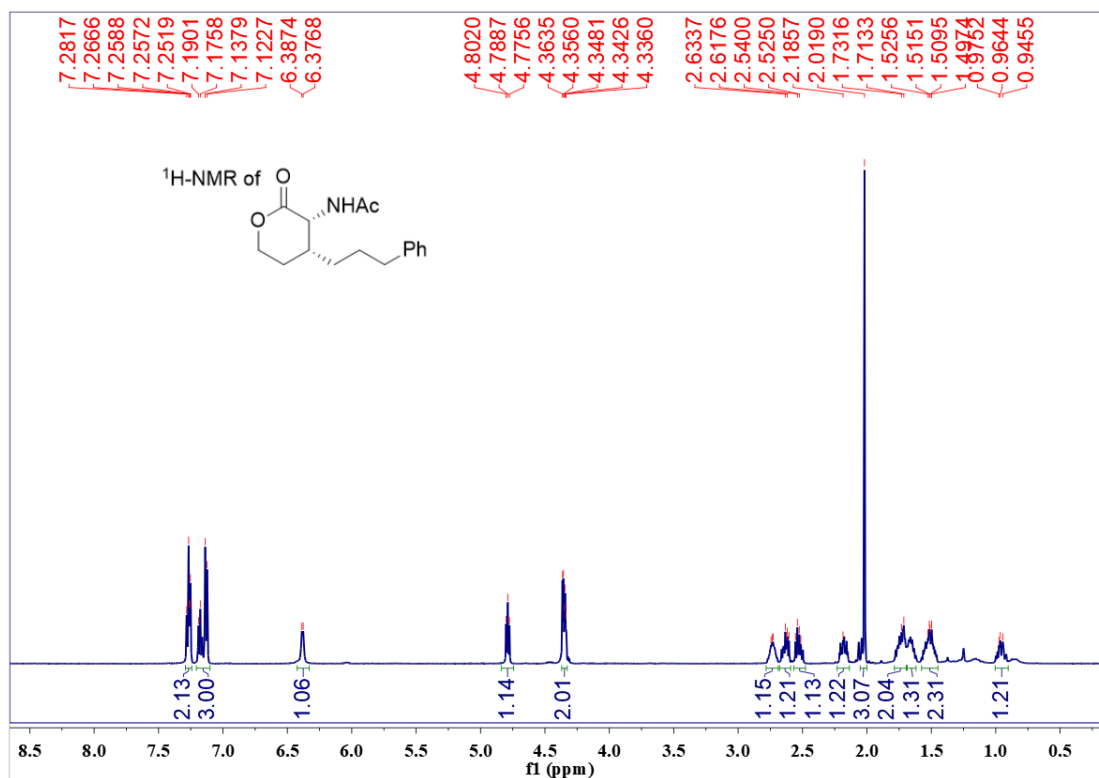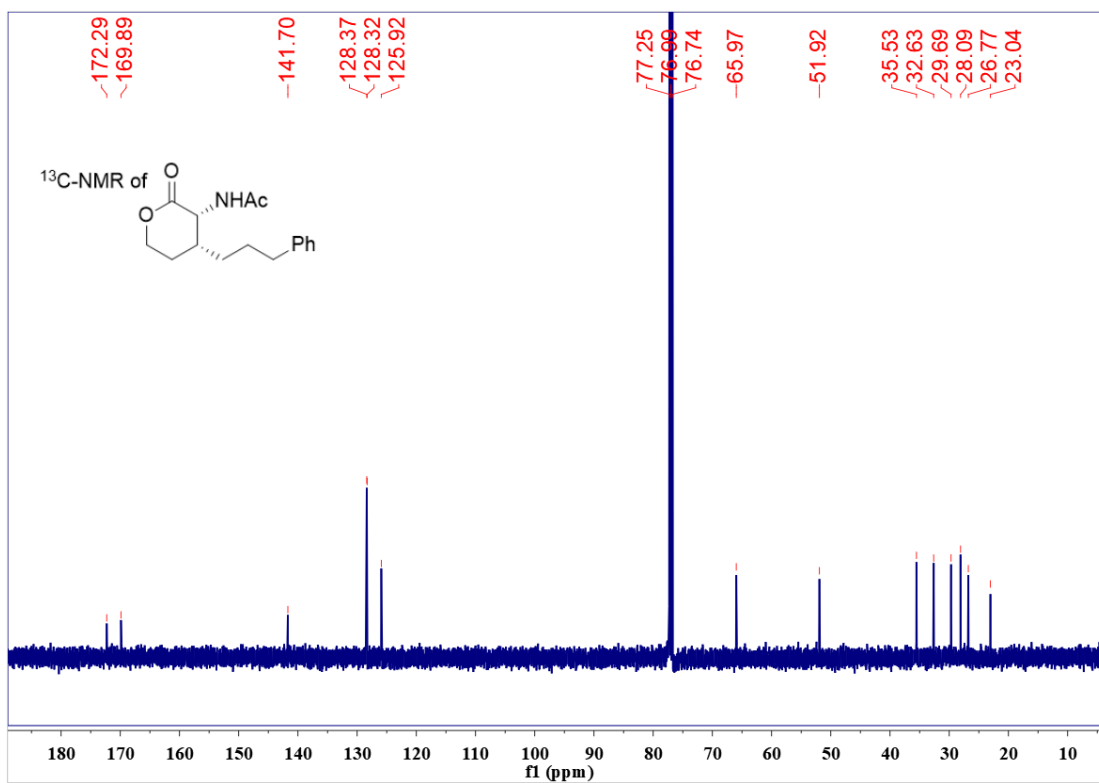

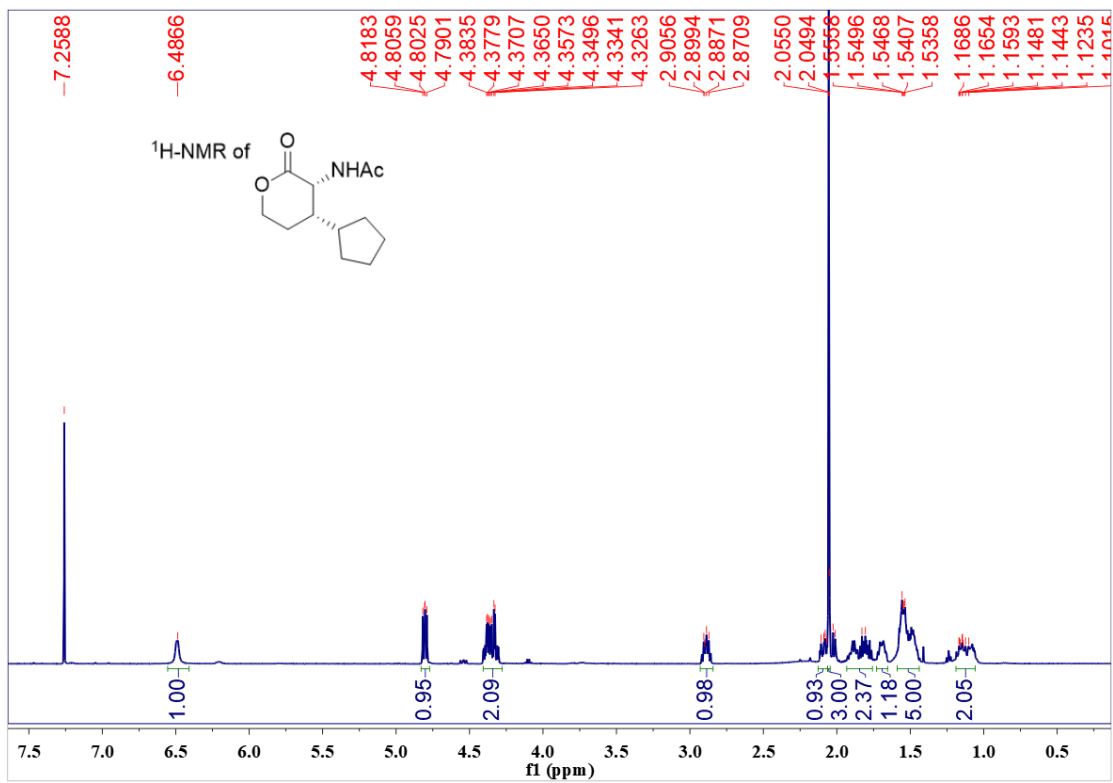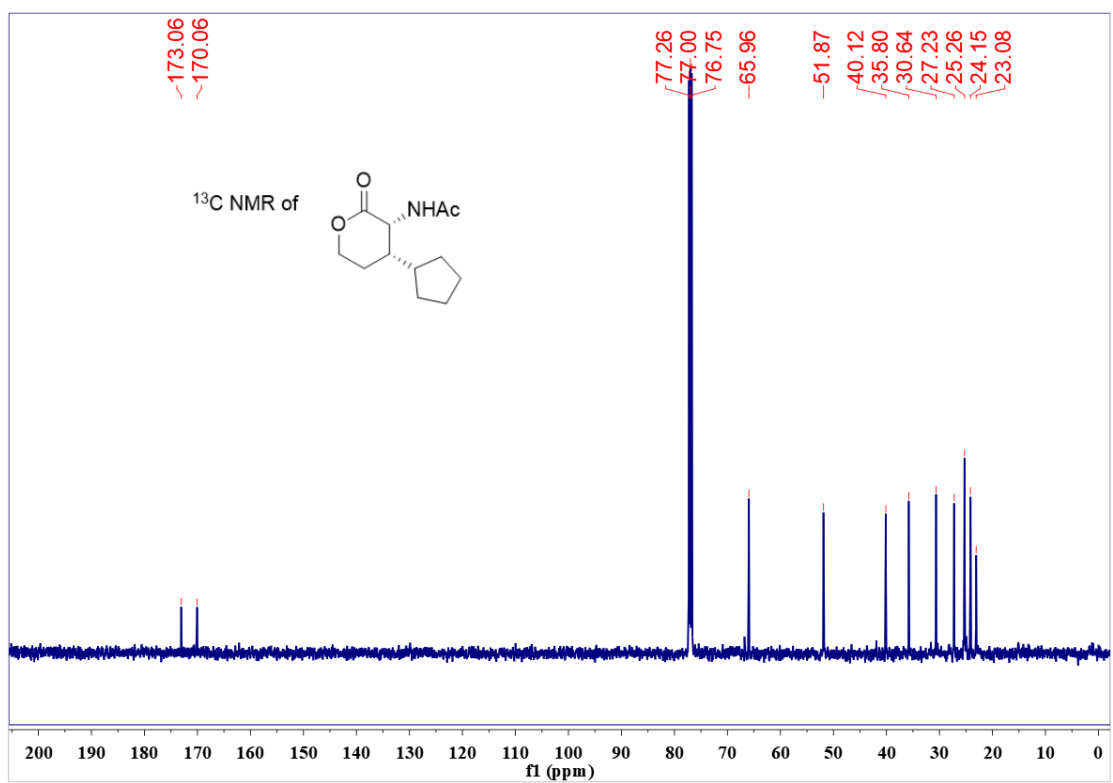

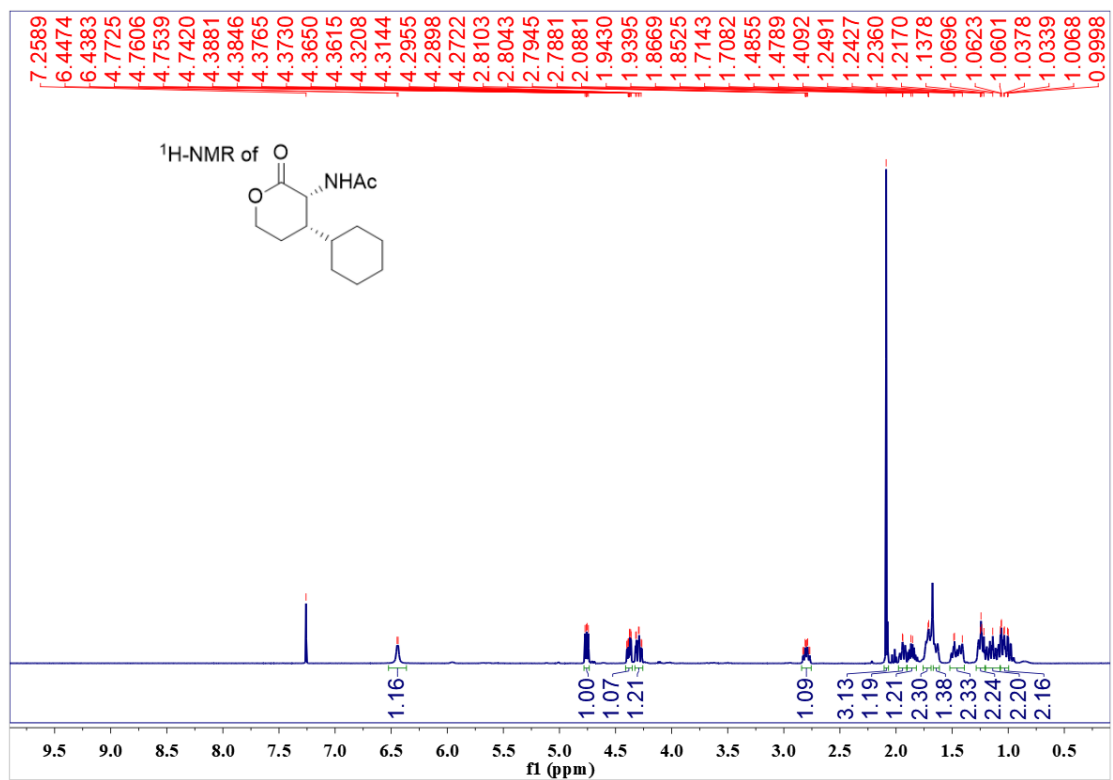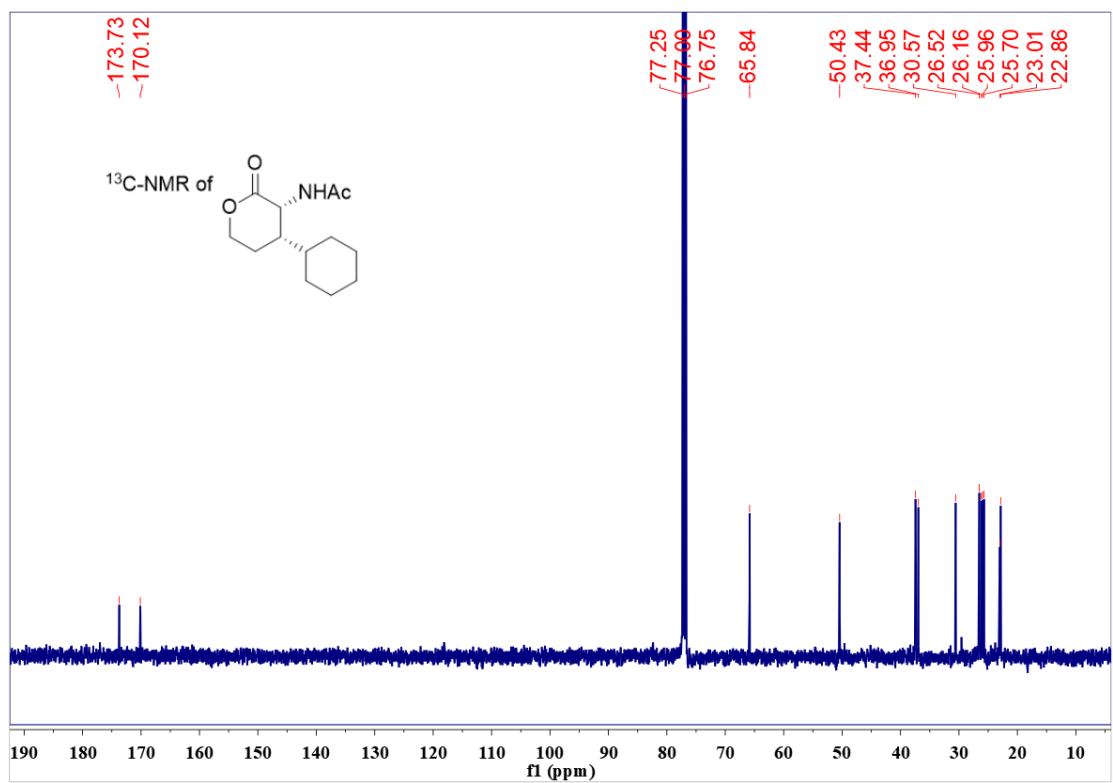

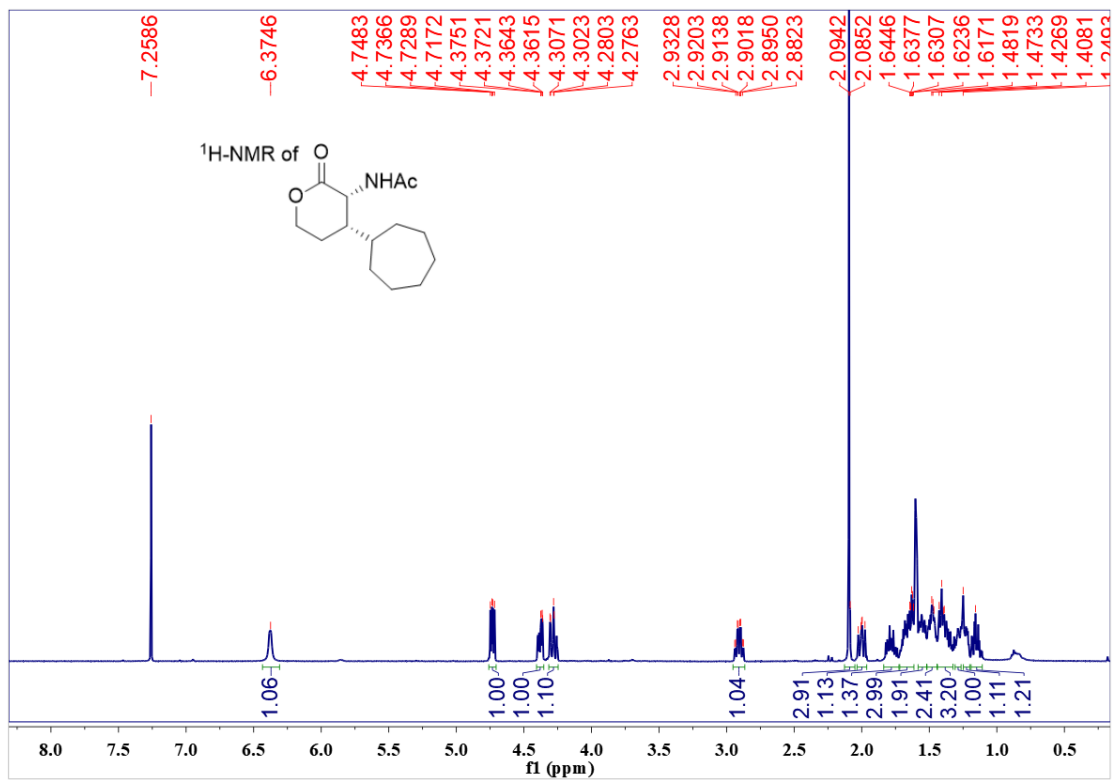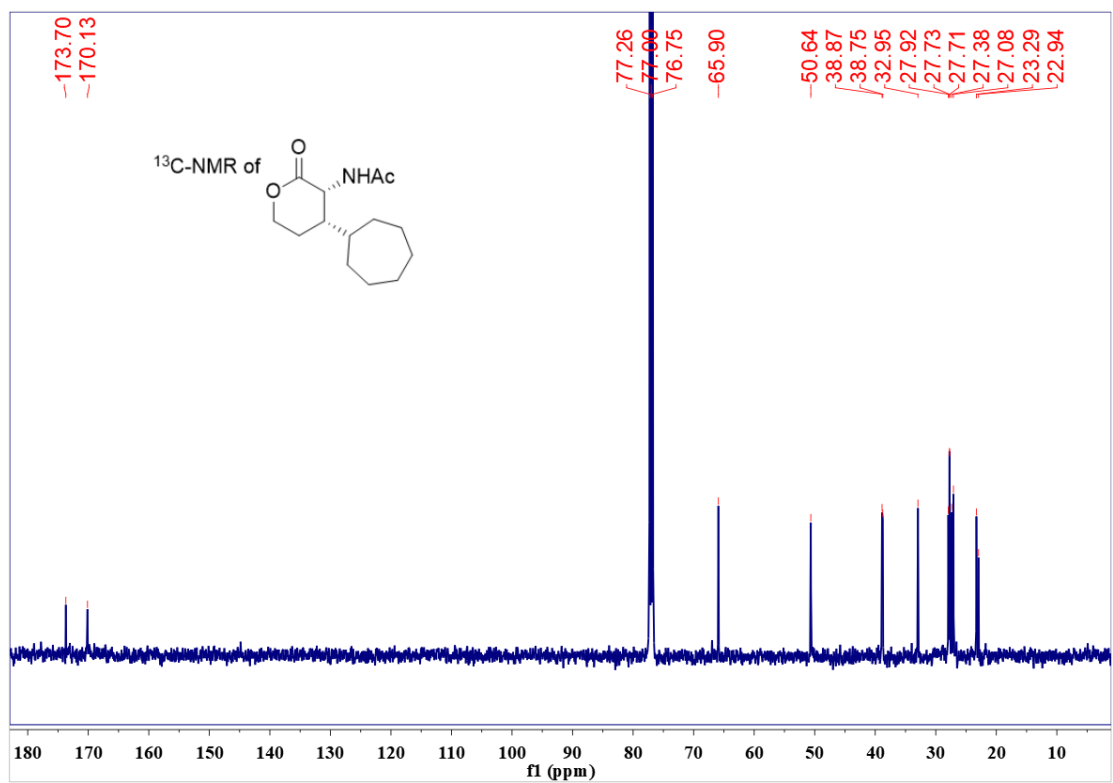

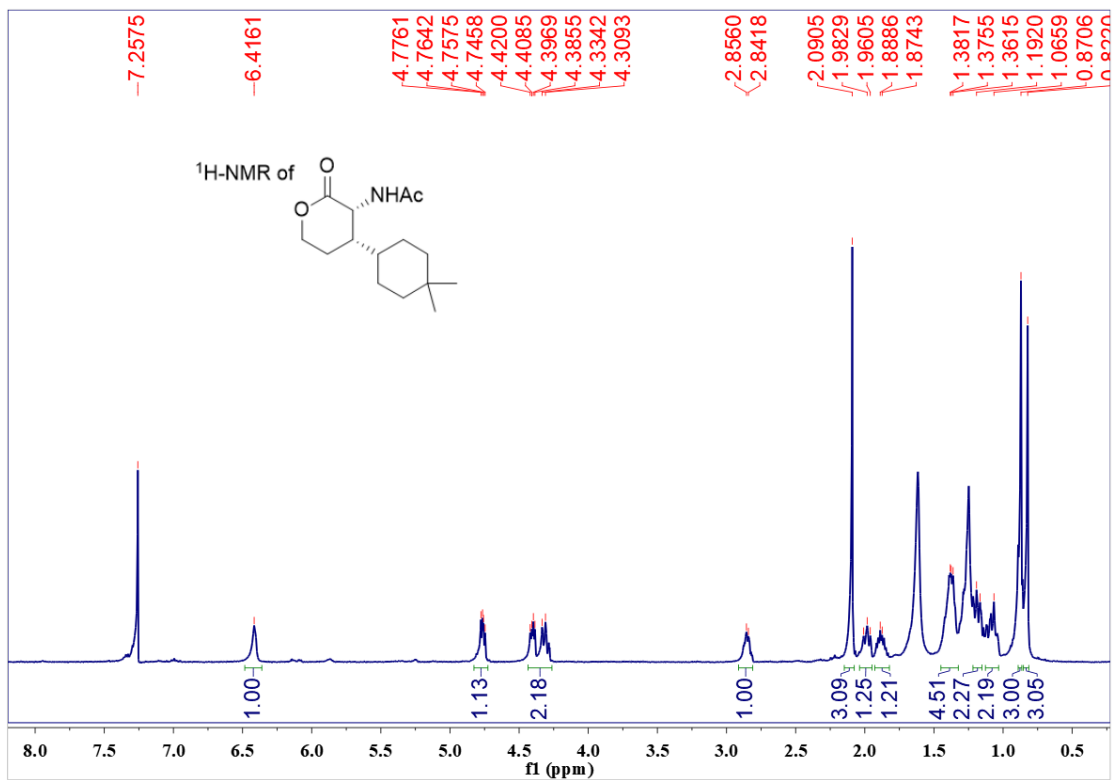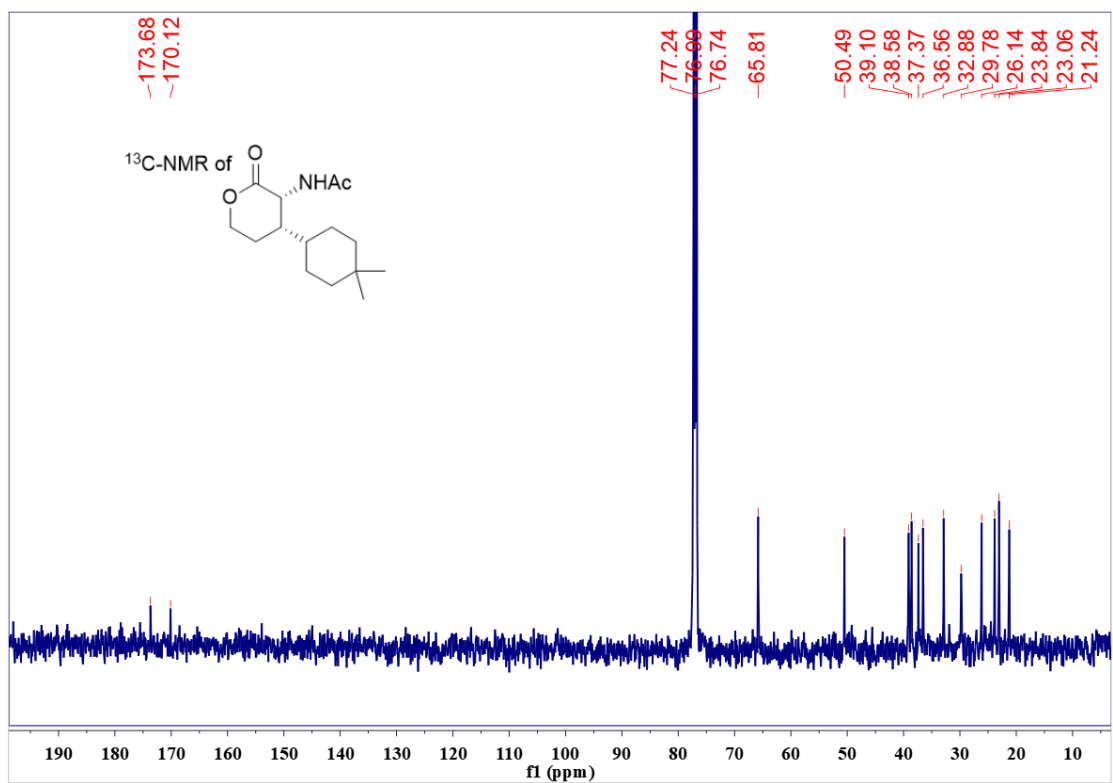

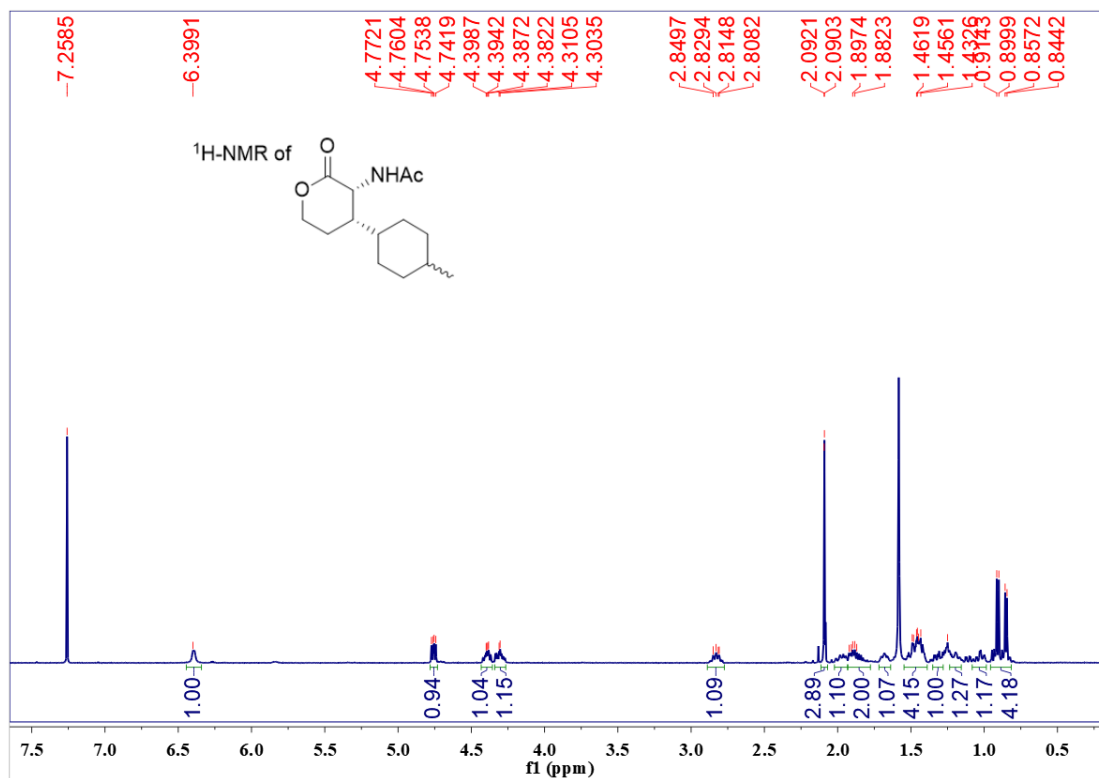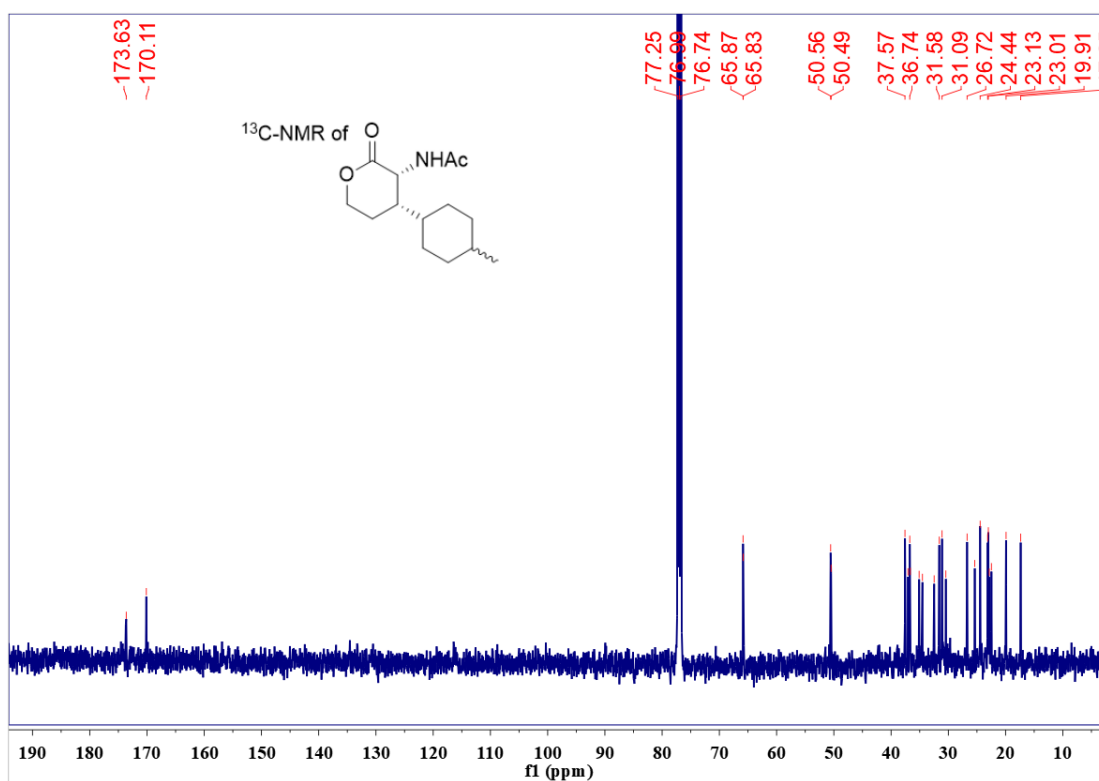

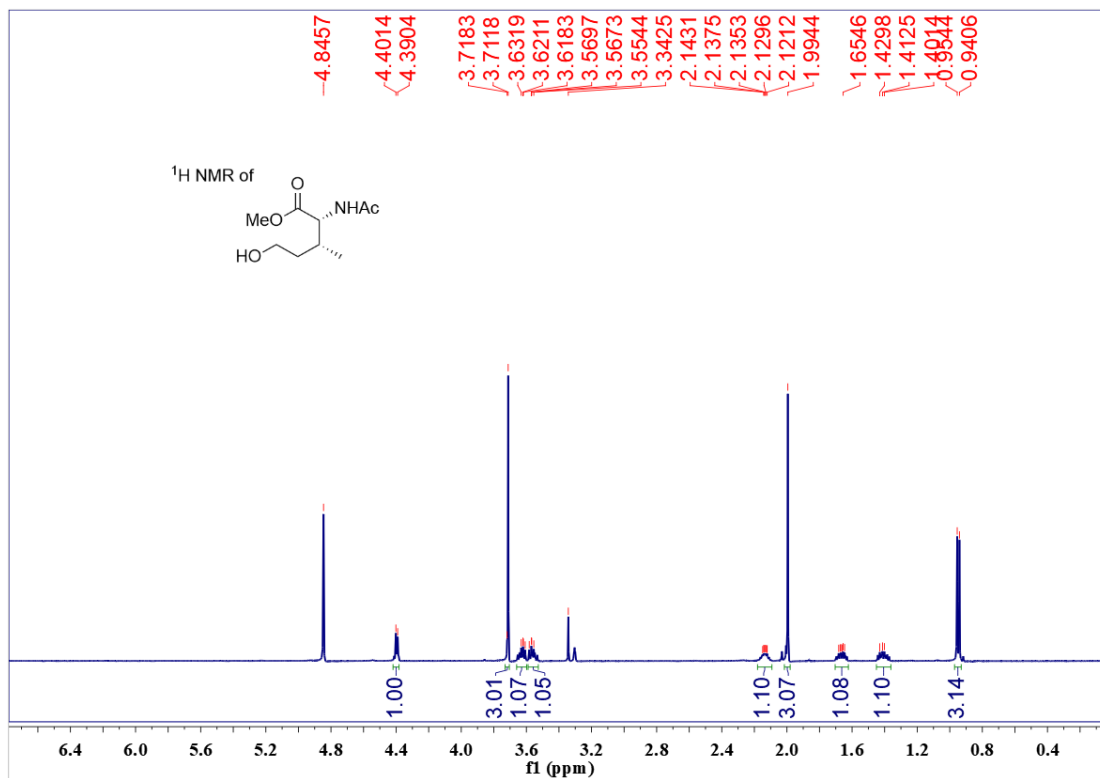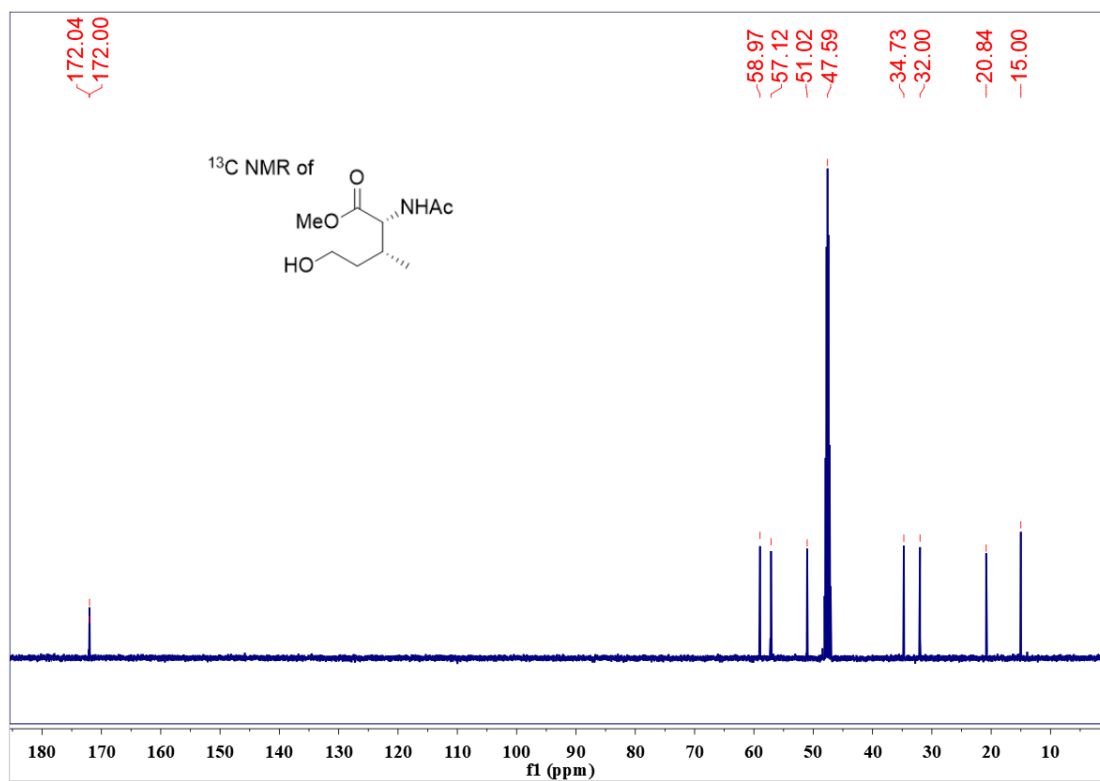



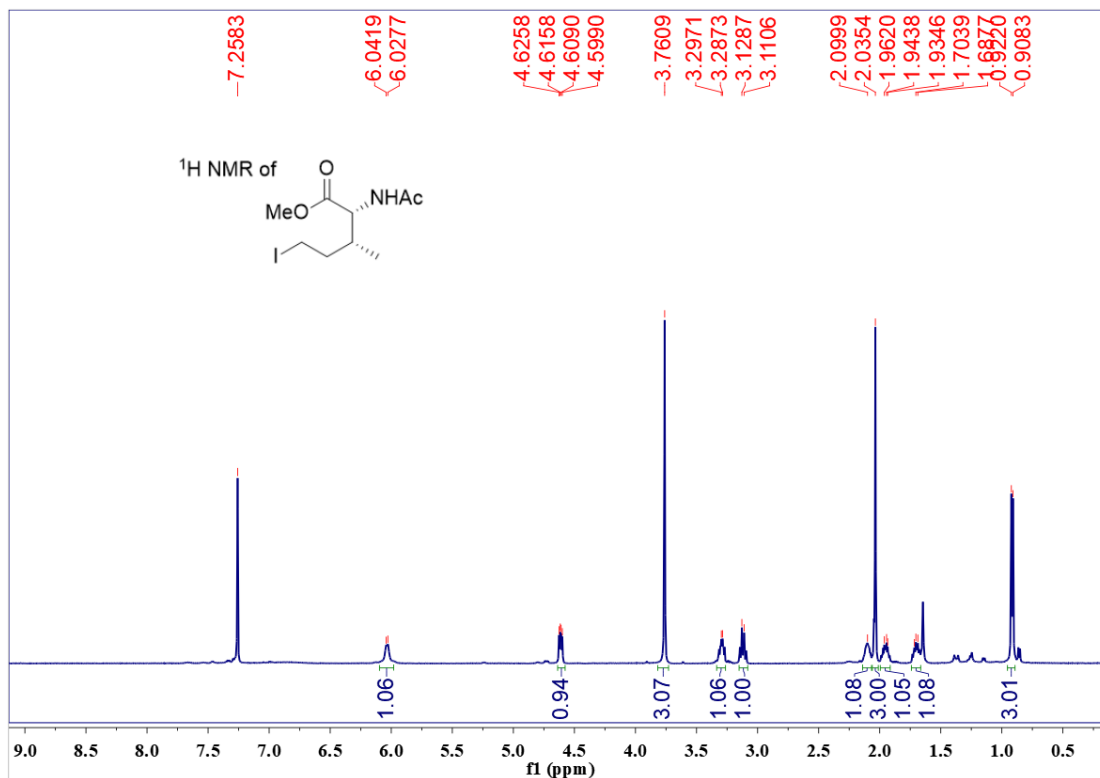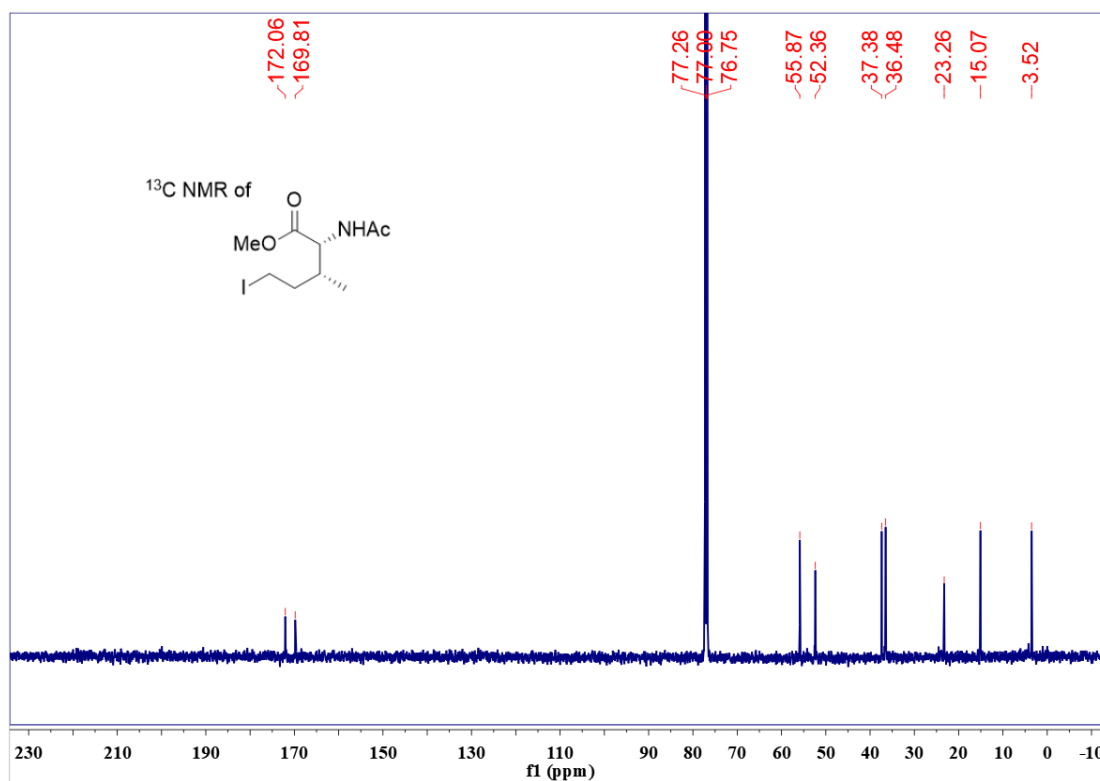

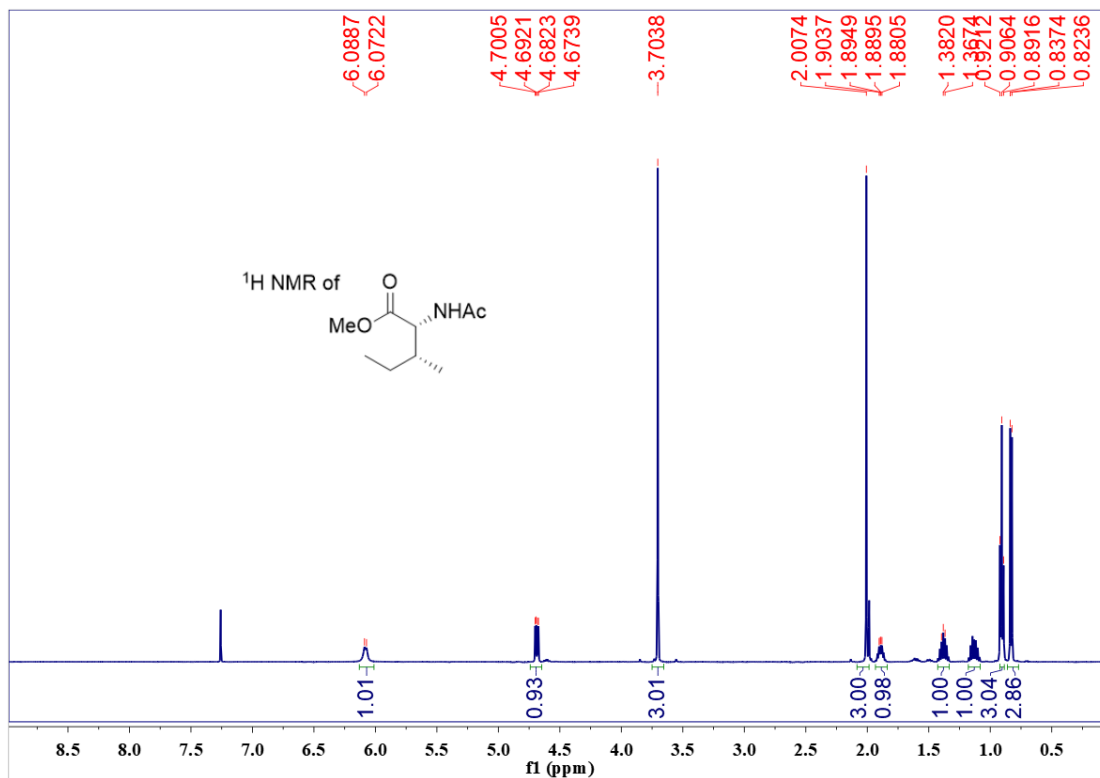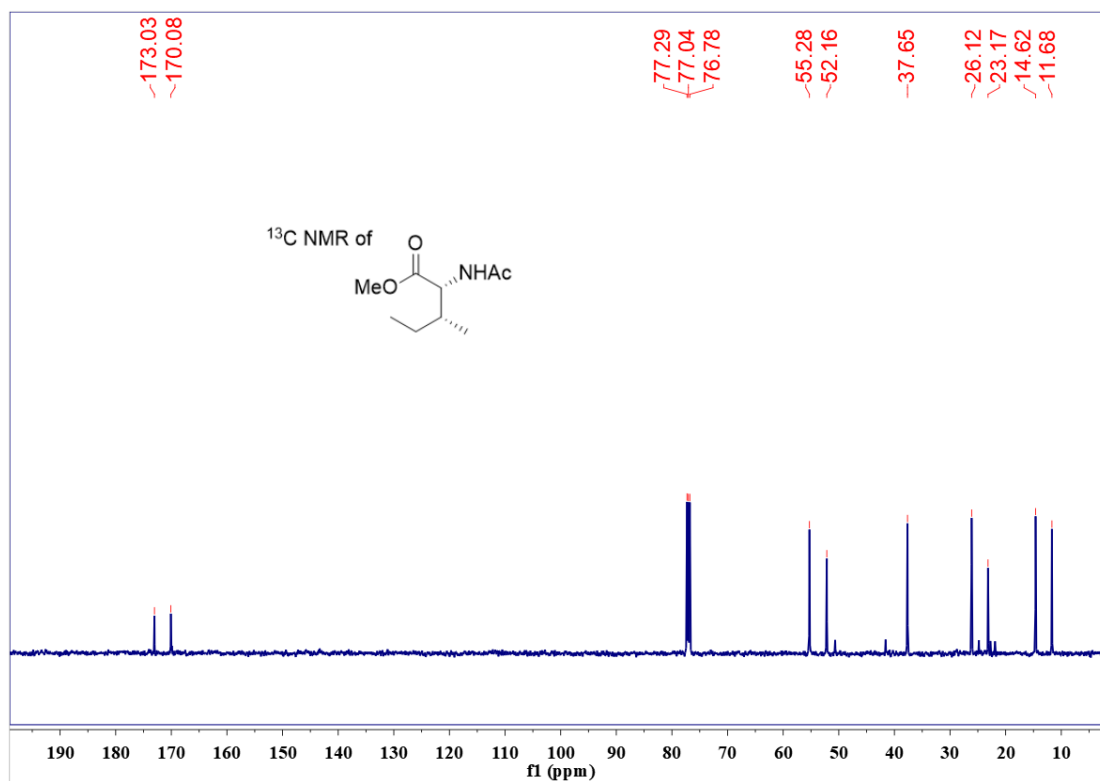

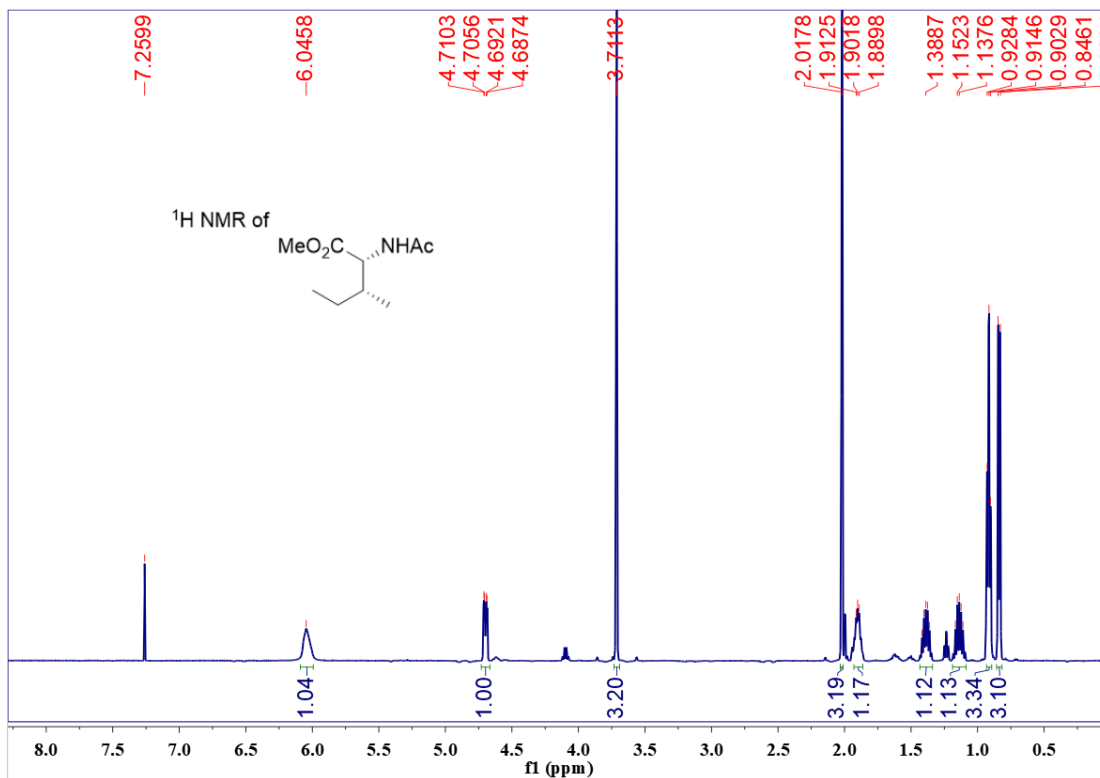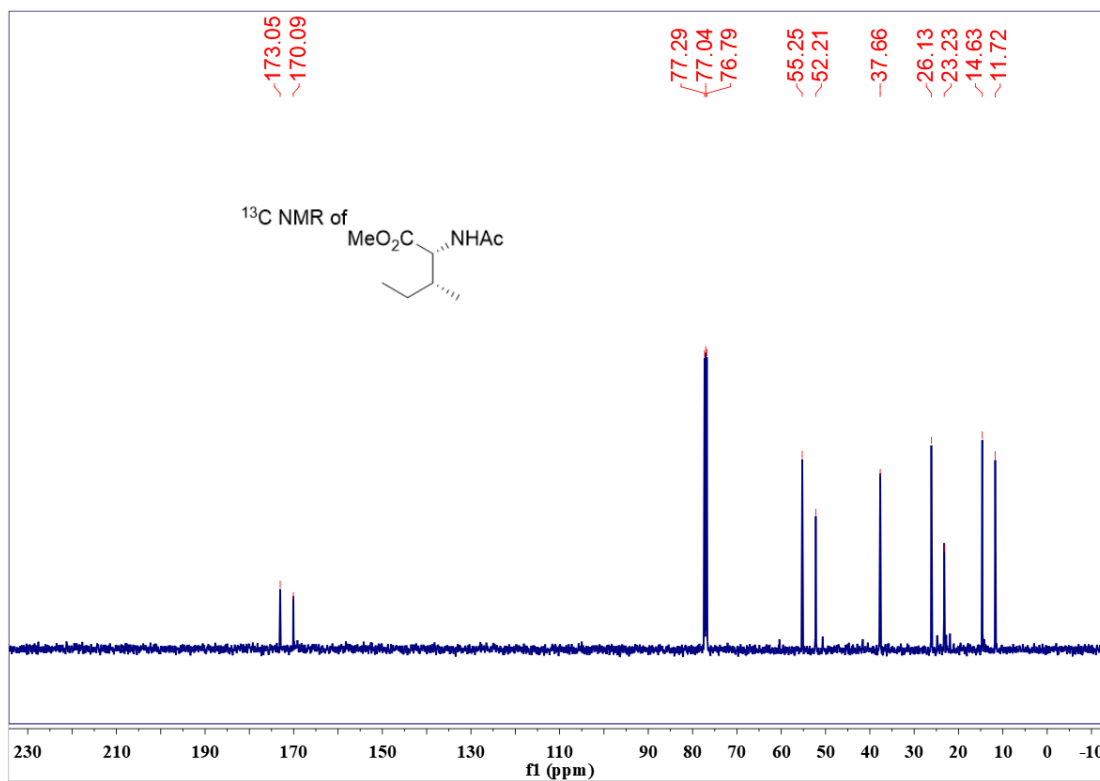

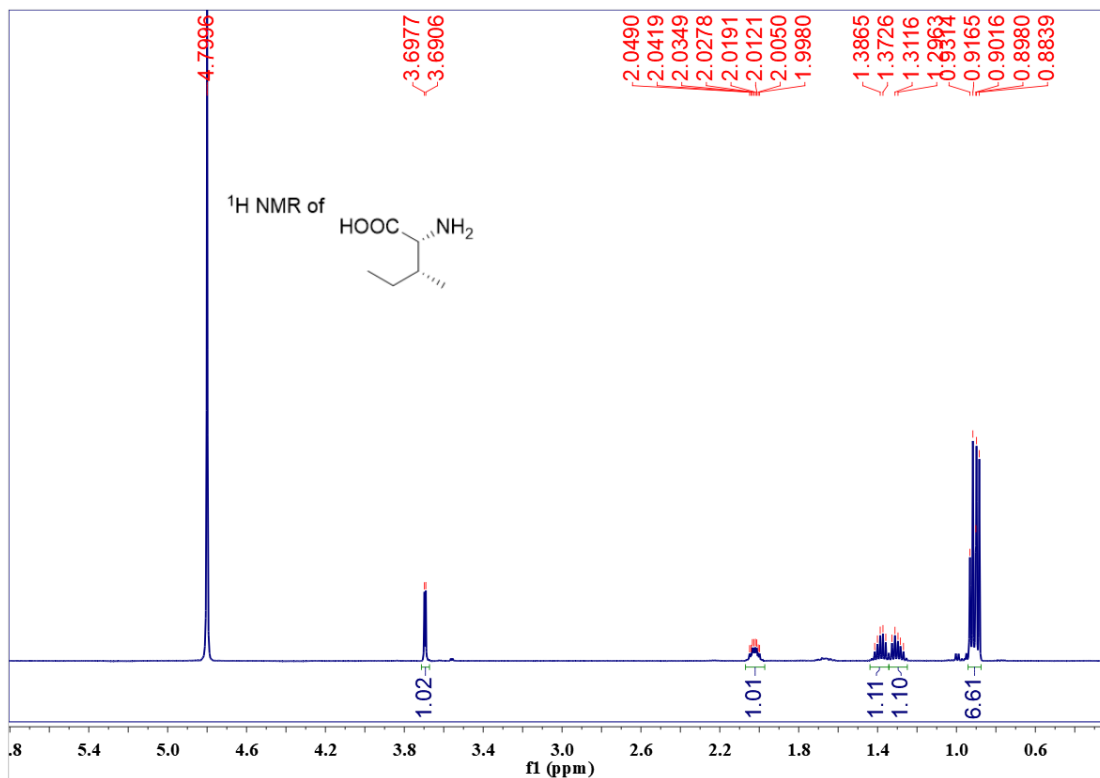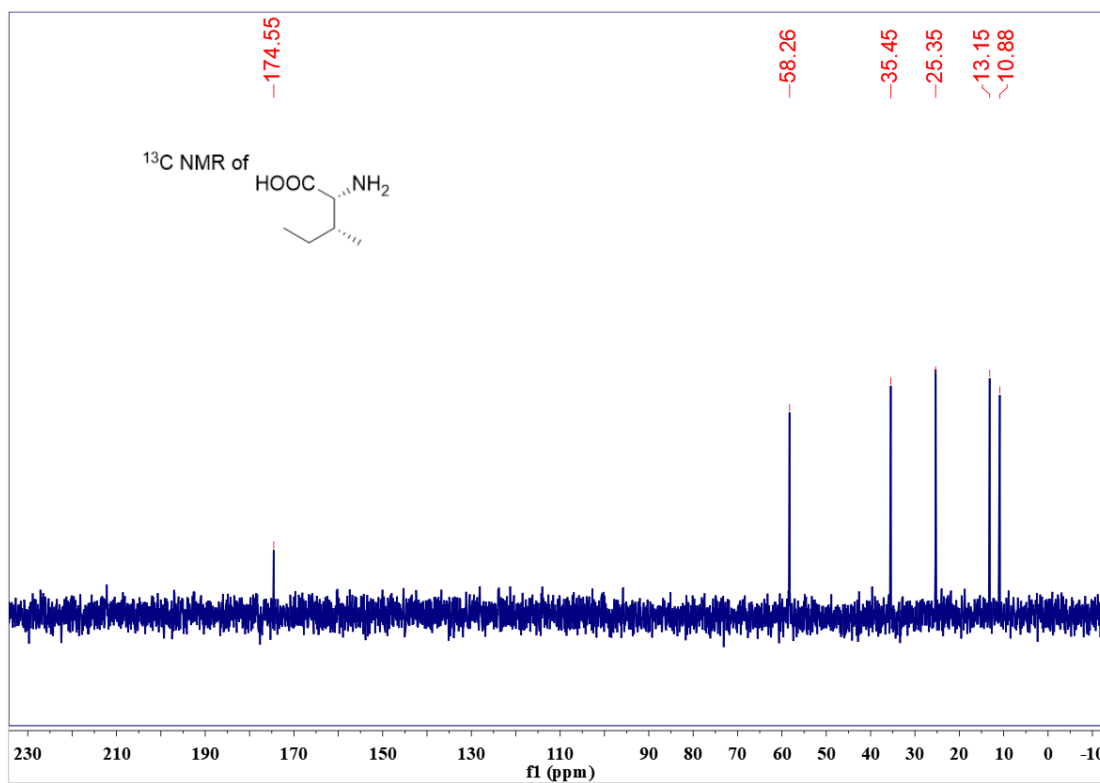

## 7. Original HPLC Data of substrates

### Rac-2a

Data File C:\CHEM32\1\DATA\WF\WF 2020-05-25 19-53-03\061-0101.D  
Sample Name: Ac-Me-Rac

```
=====
Acq. Operator   : 系统                      Seq. Line :    1
Acq. Instrument : LC2                      Location  : Vial 61
Injection Date  : 5/25/2020 7:54:36 PM     Inj       :    1
                                           Inj Volume: 5.000 µl

Acq. Method     : C:\CHEM32\1\DATA\WF\WF 2020-05-25 19-53-03\WF-80-20-0.7-5UL-25MIN.M
Last changed    : 5/25/2020 7:53:03 PM by 系统
Analysis Method : C:\CHEM32\1\DATA\TYH\TYH 2020-07-13 15-10-31\TYH.M (Sequence Method)
Last changed    : 7/13/2020 3:10:31 PM by 系统
Additional Info : Peak(s) manually integrated
=====
```

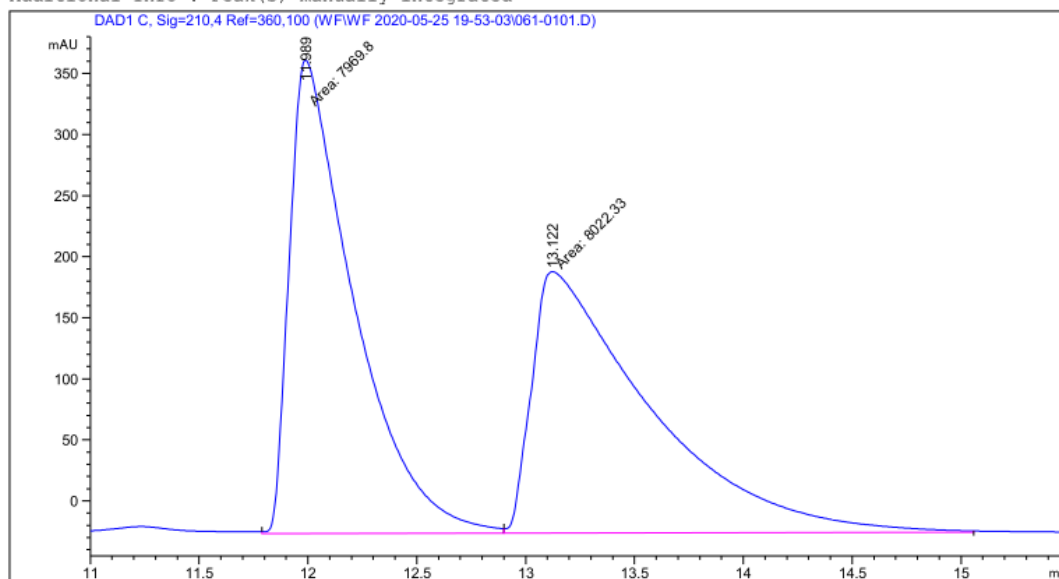

#### Area Percent Report

```
=====
Sorted By      :      Signal
Multiplier     :      1.0000
Dilution       :      1.0000
Use Multiplier & Dilution Factor with ISTDs
=====
```

Signal 1: DAD1 C, Sig=210,4 Ref=360,100

| Peak # | RetTime [min] | Type | Width [min] | Area [mAU*s] | Height [mAU] | Area %  |
|--------|---------------|------|-------------|--------------|--------------|---------|
| 1      | 11.989        | MF   | 0.3427      | 7969.80273   | 387.60199    | 49.8358 |
| 2      | 13.122        | FM   | 0.6256      | 8022.33447   | 213.73515    | 50.1642 |

Totals :                                    1.59921e4    601.33714

\*\*\* End of Report \*\*\*

# Chiral-2a

Data File C:\CHEM32\1\DATA\WF\WF 2020-06-04 19-09-33\063-0301.D  
Sample Name: Ac-Me-8-11-3

```
=====
Acq. Operator   : 系统                      Seq. Line :    3
Acq. Instrument : LC2                      Location  : Vial 63
Injection Date  : 6/4/2020 7:44:28 PM      Inj       :    1
                                           Inj Volume: 5.000 µl
Different Inj Volume from Sequence ! Actual Inj Volume : 10.000 µl
Acq. Method     : C:\CHEM32\1\DATA\WF\WF 2020-06-04 19-09-33\WF-80-20-0.7-5UL-15MIN.M
Last changed    : 6/4/2020 7:09:33 PM by 系统
Analysis Method : C:\CHEM32\1\DATA\KXH 2020-07-09 13-50-37\KXH.M (Sequence Method)
Last changed    : 7/9/2020 1:50:37 PM by 系统
Additional Info  : Peak(s) manually integrated
=====
```

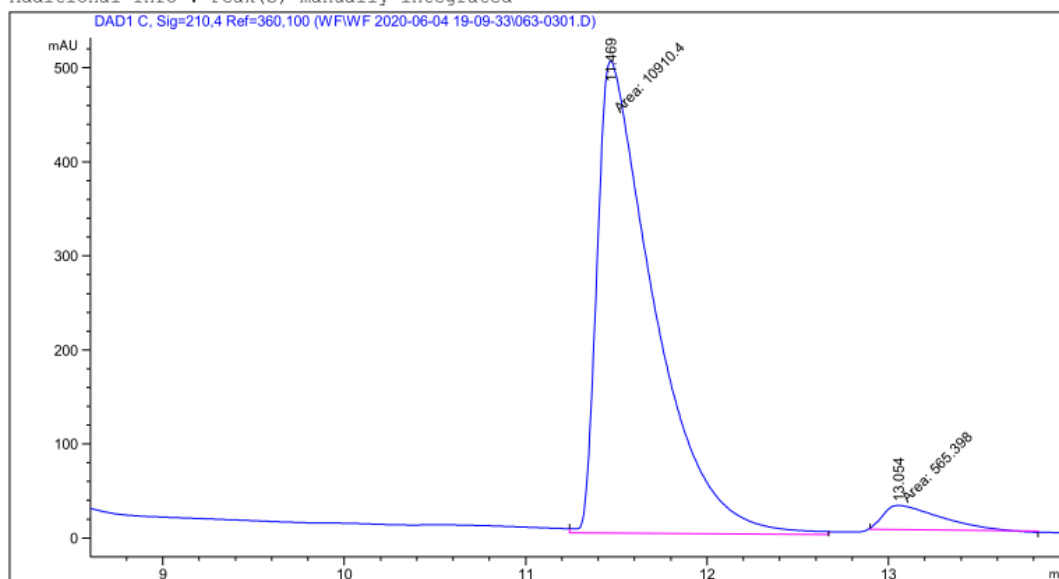

## Area Percent Report

```
Sorted By      : Signal
Multiplier     : 1.0000
Dilution       : 1.0000
Use Multiplier & Dilution Factor with ISTDs
```

Signal 1: DAD1 C, Sig=210,4 Ref=360,100

| Peak # | RetTime [min] | Type | Width [min] | Area [mAU*s] | Height [mAU] | Area %  |
|--------|---------------|------|-------------|--------------|--------------|---------|
| 1      | 11.469        | MM   | 0.3621      | 1.09104e4    | 502.17953    | 95.0731 |
| 2      | 13.054        | MM   | 0.3652      | 565.39850    | 25.80617     | 4.9269  |

Totals : 1.14758e4 527.98570

# Rac-2b

Data File C:\CHEM32\1\DATA\WF\WF 2020-07-13 20-54-10\041-0101.D  
Sample Name: 9-83-1Ac-Et-Rac

```
=====
Acq. Operator   : 系统                      Seq. Line :    1
Acq. Instrument : LC2                      Location  : Vial 41
Injection Date  : 7/13/2020 8:55:04 PM     Inj       :    1
                                           Inj Volume: 5.000 µl
Acq. Method     : C:\CHEM32\1\DATA\WF\WF 2020-07-13 20-54-10\WF-80-20-0.7-5UL-25MIN.M
Last changed    : 7/13/2020 9:12:33 PM by 系统
                (modified after loading)
Analysis Method : C:\CHEM32\1\DATA\KXH 2020-07-09 13-50-37\KXH.M (Sequence Method)
Last changed    : 7/9/2020 1:50:37 PM by 系统
Additional Info  : Peak(s) manually integrated
=====
```

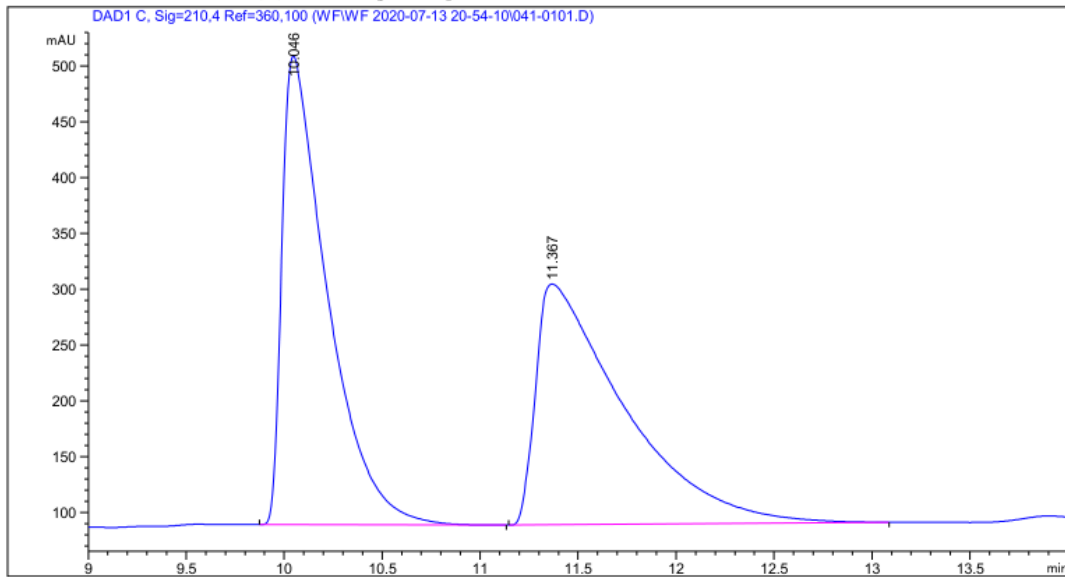

## Area Percent Report

```
Sorted By      : Signal
Multiplier     : 1.0000
Dilution       : 1.0000
Use Multiplier & Dilution Factor with ISTDs
```

Signal 1: DAD1 C, Sig=210,4 Ref=360,100

| Peak # | RetTime [min] | Type | Width [min] | Area [mAU*s] | Height [mAU] | Area %  |
|--------|---------------|------|-------------|--------------|--------------|---------|
| 1      | 10.046        | BB   | 0.2318      | 6763.83154   | 420.18231    | 50.1106 |
| 2      | 11.367        | BB   | 0.4361      | 6733.97607   | 215.76871    | 49.8894 |

Totals : 1.34978e4 635.95102

# Chiral-2b

Data File C:\CHEM32\1\DATA\WF\WF 2020-08-11 08-04-19\061-0101.D  
Sample Name: zyx-2b

```
=====
Acq. Operator   : 系统                      Seq. Line :    1
Acq. Instrument : LC2                      Location  : Vial 61
Injection Date  : 8/11/2020 8:05:15 AM     Inj       :    1
                                           Inj Volume: 5.000 µl
Acq. Method     : C:\CHEM32\1\DATA\WF\WF 2020-08-11 08-04-19\WF-80-20-0.7-5UL-15MIN.M
Last changed    : 8/11/2020 8:04:19 AM by 系统
Analysis Method : C:\CHEM32\1\DATA\LBW\LBW 2020-08-11 14-02-16\LBW2.M (Sequence Method)
Last changed    : 8/11/2020 2:02:16 PM by 系统
Additional Info  : Peak(s) manually integrated
=====
```

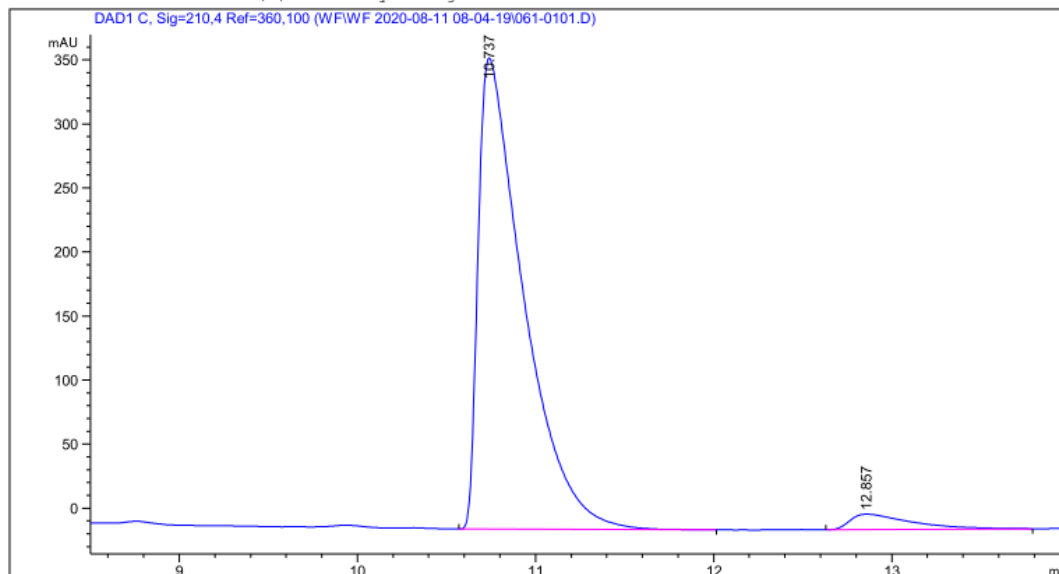

## Area Percent Report

```
Sorted By      : Signal
Multiplier     : 1.0000
Dilution       : 1.0000
Use Multiplier & Dilution Factor with ISTDs
```

Signal 1: DAD1 C, Sig=210,4 Ref=360,100

| Peak # | RetTime [min] | Type | Width [min] | Area [mAU*s] | Height [mAU] | Area %  |
|--------|---------------|------|-------------|--------------|--------------|---------|
| 1      | 10.737        | BB   | 0.2561      | 6497.89063   | 367.77640    | 95.7953 |
| 2      | 12.857        | BB   | 0.3384      | 285.20709    | 12.03627     | 4.2047  |

Totals : 6783.09772 379.81266

\*\*\* End of Report \*\*\*



# Rac-2c

Data File C:\CHEM32\1\DATA\WF\WF 2020-07-25 09-51-22\051-0101.D  
Sample Name: Ac-nPr-9-23-rac

```
=====
Acq. Operator   : 系统                      Seq. Line :    1
Acq. Instrument : LC2                      Location  : Vial 51
Injection Date  : 7/25/2020 9:52:16 AM      Inj       :    1
                                           Inj Volume: 5.000 µl
Acq. Method     : C:\CHEM32\1\DATA\WF\WF 2020-07-25 09-51-22\WF-80-20-0.7-5UL-25MIN.M
Last changed    : 7/25/2020 9:51:22 AM by 系统
Analysis Method : C:\CHEM32\1\METHODS\WT.M
Last changed    : 7/16/2020 7:22:02 PM by 系统
Additional Info  : Peak(s) manually integrated
=====
```

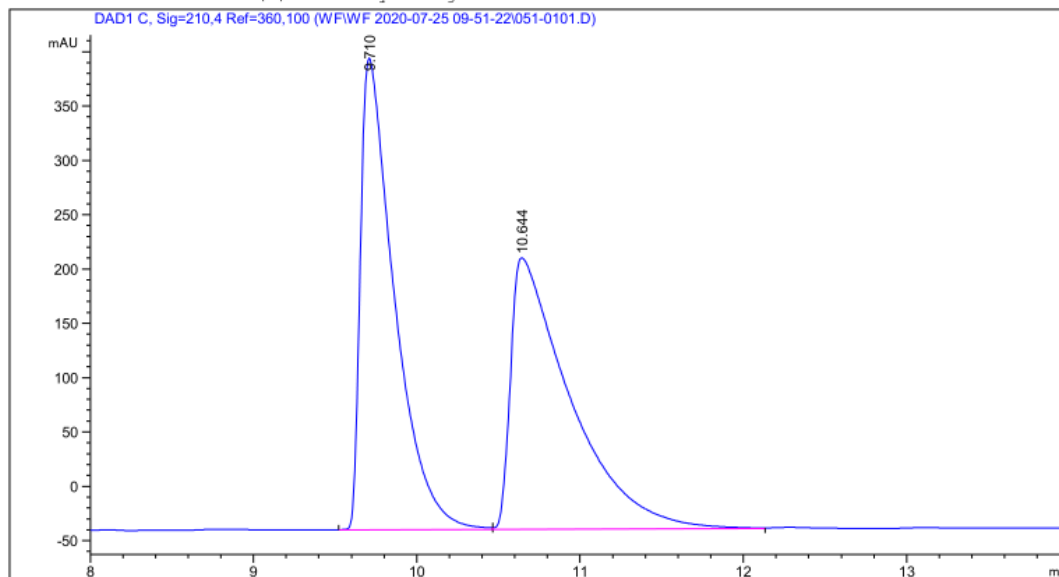

## Area Percent Report

```
Sorted By      : Signal
Multiplier     : 1.0000
Dilution       : 1.0000
Use Multiplier & Dilution Factor with ISTDs
```

Signal 1: DAD1 C, Sig=210,4 Ref=360,100

| Peak # | RetTime [min] | Type | Width [min] | Area [mAU*s] | Height [mAU] | Area %  |
|--------|---------------|------|-------------|--------------|--------------|---------|
| 1      | 9.710         | BV   | 0.2102      | 6257.71875   | 433.93262    | 49.7234 |
| 2      | 10.644        | VV   | 0.3534      | 6327.33594   | 249.92873    | 50.2766 |

Totals : 1.25851e4 683.86134

\*\*\* End of Report \*\*\*

# Chiral-2c

Data File C:\CHEM32\1\DATA\WF\WF 2020-08-14 14-39-12\063-0601.D  
Sample Name: 0814-2c

```
=====
Acq. Operator   : 系统                      Seq. Line :    6
Acq. Instrument : LC2                      Location  : Vial 63
Injection Date  : 8/14/2020 3:59:13 PM      Inj       :    1
                                           Inj Volume: 5.000 µl
Acq. Method     : C:\CHEM32\1\DATA\WF\WF 2020-08-14 14-39-12\WF-80-20-0.7-5UL-15MIN.M
Last changed    : 8/14/2020 3:43:30 PM by 系统
                (modified after loading)
Analysis Method : C:\CHEM32\1\DATA\LBW\LBW 2020-08-14 13-51-26\LBW.M (Sequence Method)
Last changed    : 8/14/2020 1:51:26 PM by 系统
Additional Info  : Peak(s) manually integrated
=====
```

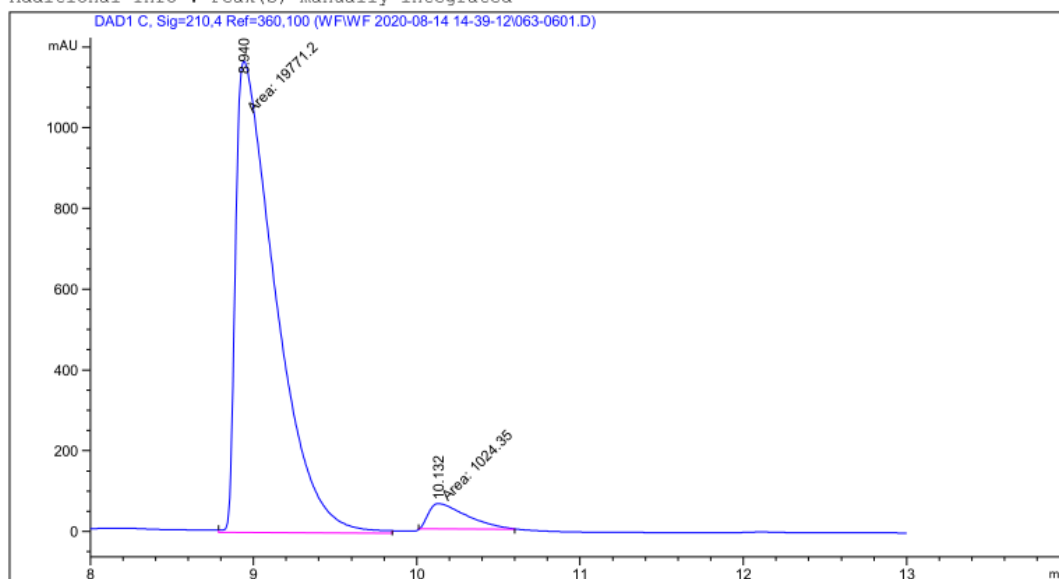

## Area Percent Report

```
Sorted By      : Signal
Multiplier     : 1.0000
Dilution       : 1.0000
Use Multiplier & Dilution Factor with ISTDs
```

Signal 1: DAD1 C, Sig=210,4 Ref=360,100

| Peak # | RetTime [min] | Type | Width [min] | Area [mAU*s] | Height [mAU] | Area %  |
|--------|---------------|------|-------------|--------------|--------------|---------|
| 1      | 8.940         | MM   | 0.2821      | 1.97712e4    | 1168.22510   | 95.0742 |
| 2      | 10.132        | MM   | 0.2723      | 1024.34680   | 62.70263     | 4.9258  |

Totals : 2.07956e4 1230.92772

# Rac-2d

Data File C:\CHEM32\1\DATA\WF\WF 2020-08-11 19-55-06\002-0201.D  
Sample Name: Ac-iPr-rac

```
=====
Acq. Operator   : 系统                               Seq. Line :    2
Acq. Instrument : LC2                               Location  : Vial 2
Injection Date  : 8/11/2020 8:11:16 PM             Inj       :    1
                                                    Inj Volume: 5.000 µl
Different Inj Volume from Sequence !   Actual Inj Volume : 10.000 µl
Acq. Method    : C:\CHEM32\1\DATA\WF\WF 2020-08-11 19-55-06\WF-80-20-0.7-5UL-15MIN.M
Last changed   : 8/11/2020 8:22:46 PM by 系统
                (modified after loading)
Analysis Method: C:\CHEM32\1\DATA\LBW\LBW 2020-08-11 14-02-16\LBW2.M (Sequence Method)
Last changed   : 8/11/2020 2:02:16 PM by 系统
Additional Info : Peak(s) manually integrated
DAD1 C, Sig=210,4 Ref=360,100 (WF\WF 2020-08-11 19-55-06\002-0201.D)
```

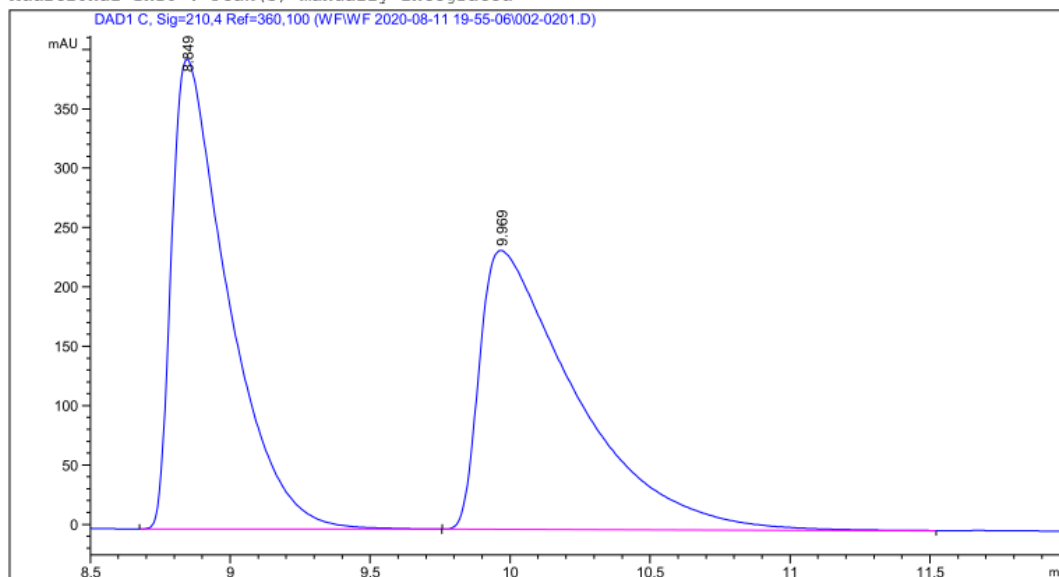

## Area Percent Report

```
Sorted By      :      Signal
Multiplier     :      1.0000
Dilution       :      1.0000
Use Multiplier & Dilution Factor with ISTDs
```

Signal 1: DAD1 C, Sig=210,4 Ref=360,100

| Peak # | RetTime [min] | Type | Width [min] | Area [mAU*s] | Height [mAU] | Area %  |
|--------|---------------|------|-------------|--------------|--------------|---------|
| 1      | 8.849         | BB   | 0.2031      | 5531.16895   | 395.73355    | 49.6491 |
| 2      | 9.969         | BB   | 0.3406      | 5609.36328   | 234.89215    | 50.3509 |

Totals :                                    1.11405e4    630.62570

# Chiral-2d

Data File C:\CHEM32\1\DATA\WF\WF 2020-08-11 19-55-06\001-0101.D  
Sample Name: Ac-iPr-chiral

```
=====
Acq. Operator   : 系统                      Seq. Line :    1
Acq. Instrument : LC2                      Location  : Vial 1
Injection Date  : 8/11/2020 7:56:01 PM      Inj       :    1
                                           Inj Volume: 5.000 µl
Acq. Method    : C:\CHEM32\1\DATA\WF\WF 2020-08-11 19-55-06\WF-80-20-0.7-5UL-25MIN.M
Last changed   : 8/11/2020 8:10:15 PM by 系统
               (modified after loading)
Analysis Method: C:\CHEM32\1\DATA\LBW\LBW 2020-08-11 14-02-16\LBW2.M (Sequence Method)
Last changed   : 8/11/2020 2:02:16 PM by 系统
Additional Info : Peak(s) manually integrated
=====
```

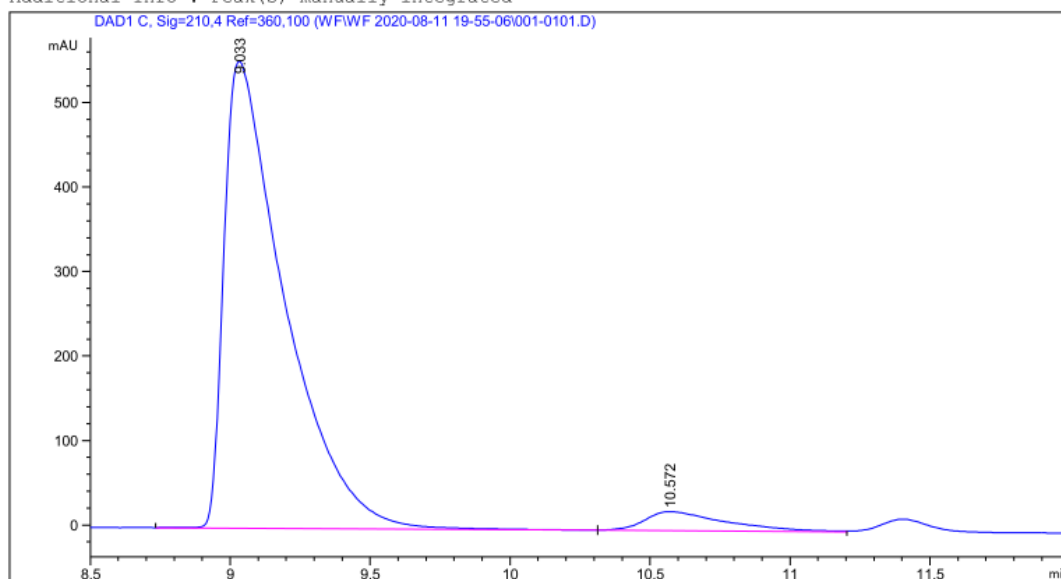

## Area Percent Report

```
=====
Sorted By      : Signal
Multiplier     : 1.0000
Dilution       : 1.0000
Use Multiplier & Dilution Factor with ISTDs
=====
```

Signal 1: DAD1 C, Sig=210,4 Ref=360,100

| Peak # | RetTime [min] | Type | Width [min] | Area [mAU*s] | Height [mAU] | Area %  |
|--------|---------------|------|-------------|--------------|--------------|---------|
| 1      | 9.033         | BV   | 0.2176      | 8322.12402   | 553.01227    | 94.8138 |
| 2      | 10.572        | VV   | 0.2854      | 455.20840    | 22.56281     | 5.1862  |

Totals : 8777.33243 575.57508

# Rac-2e

Data File C:\CHEM32\1\DATA\WF\WF 2020-07-18 12-03-28\053-0301.D  
Sample Name: Ac-i-Bu-9-101-3-rac

```
=====
Acq. Operator   : 系统                      Seq. Line :    3
Acq. Instrument : LC2                      Location  : Vial 53
Injection Date  : 7/18/2020 12:41:44 PM    Inj       :    1
                                           Inj Volume: 5.000 µl
Acq. Method     : C:\CHEM32\1\DATA\WF\WF 2020-07-18 12-03-28\WF-80-20-0.7-5UL-25MIN.M
Last changed    : 7/18/2020 12:04:15 PM by 系统
Analysis Method : C:\CHEM32\1\DATA\TDS\TDS 2020-07-18 08-58-02\TDS.M (Sequence Method)
Last changed    : 7/18/2020 8:58:02 AM by 系统
Additional Info  : Peak(s) manually integrated
=====
```

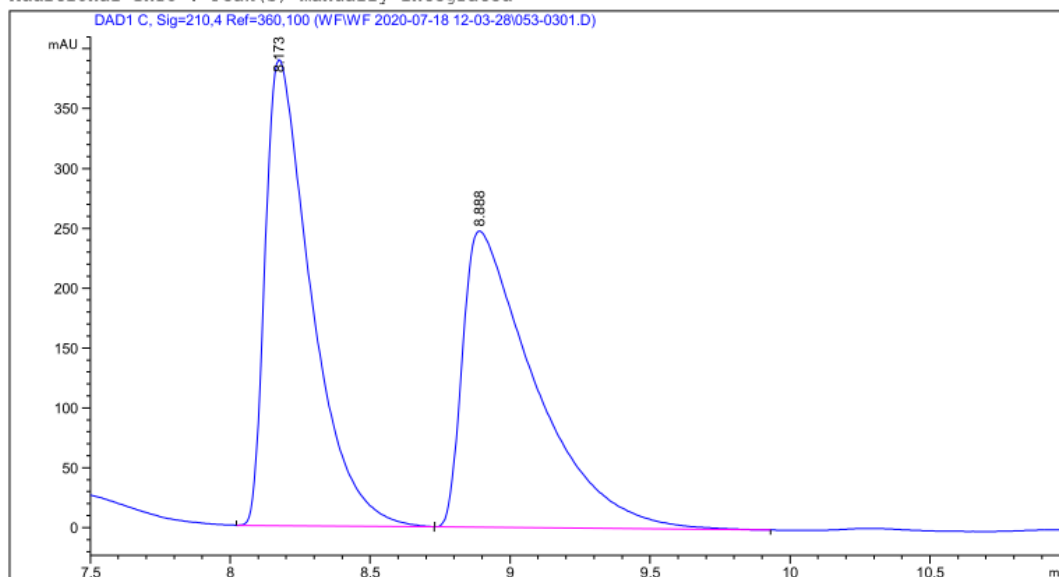

## Area Percent Report

```
Sorted By      : Signal
Multiplier     : 1.0000
Dilution       : 1.0000
Use Multiplier & Dilution Factor with ISTDs
```

Signal 1: DAD1 C, Sig=210,4 Ref=360,100

| Peak # | RetTime [min] | Type | Width [min] | Area [mAU*s] | Height [mAU] | Area %  |
|--------|---------------|------|-------------|--------------|--------------|---------|
| 1      | 8.173         | BB   | 0.1689      | 4431.90479   | 389.08664    | 49.9567 |
| 2      | 8.888         | BB   | 0.2553      | 4439.58203   | 247.50140    | 50.0433 |

Totals : 8871.48682 636.58804

\*\*\* End of Report \*\*\*

# Chiral-2e

Data File C:\CHEM32\1\DATA\WF\WF 2020-07-29 14-13-43\053-0501.D  
Sample Name: Ac-iBu-2d

```
=====
Acq. Operator   : 系统                               Seq. Line :    5
Acq. Instrument : LC2                               Location  : Vial 53
Injection Date  : 7/29/2020 3:44:37 PM             Inj       :    1
                                                    Inj Volume: 10.000 µl
Different Inj Volume from Sequence ! Actual Inj Volume : 5.000 µl
Acq. Method    : C:\CHEM32\1\DATA\WF\WF 2020-07-29 14-13-43\WF-80-20-0.7-10UL-20MIN.M
Last changed   : 7/29/2020 2:13:43 PM by 系统
Analysis Method : C:\CHEM32\1\DATA\LBW\LBW 2020-07-21 19-22-35\LBW.M (Sequence Method)
Last changed   : 7/21/2020 7:22:35 PM by 系统
Additional Info : Peak(s) manually integrated
=====
```

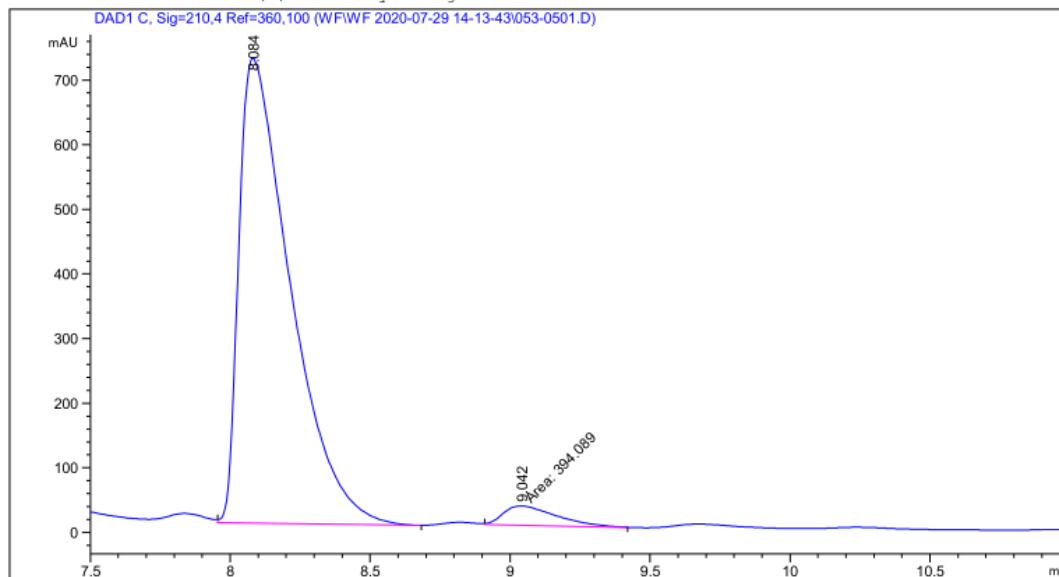

## Area Percent Report

```
Sorted By      : Signal
Multiplier     : 1.0000
Dilution       : 1.0000
Use Multiplier & Dilution Factor with ISTDs
```

Signal 1: DAD1 C, Sig=210,4 Ref=360,100

| Peak # | RetTime [min] | Type | Width [min] | Area [mAU*s] | Height [mAU] | Area %  |
|--------|---------------|------|-------------|--------------|--------------|---------|
| 1      | 8.084         | VB   | 0.1912      | 9202.78027   | 719.83093    | 95.8936 |
| 2      | 9.042         | MM   | 0.2205      | 394.08899    | 29.78770     | 4.1064  |

Totals : 9596.86926 749.61863

## Rac-2f

Data File C:\CHEM32\1\DATA\WF\WF 2020-07-18 12-03-28\051-0101.D  
Sample Name: Ac-n-Pent-RAC-9-101-1

```
=====
Acq. Operator   : 系统                      Seq. Line :    1
Acq. Instrument : LC2                      Location  : Vial 51
Injection Date  : 7/18/2020 12:04:22 PM    Inj       :    1
                                           Inj Volume: 5.000 µl

Acq. Method     : C:\CHEM32\1\DATA\WF\WF 2020-07-18 12-03-28\WF-80-20-0.7-5UL-30MIN.M
Last changed    : 7/18/2020 12:23:40 PM by 系统
                 (modified after loading)

Analysis Method : C:\CHEM32\1\DATA\TDS\TDS 2020-07-18 08-58-02\TDS.M (Sequence Method)
Last changed    : 7/18/2020 8:58:02 AM by 系统

Additional Info  : Peak(s) manually integrated
=====
```

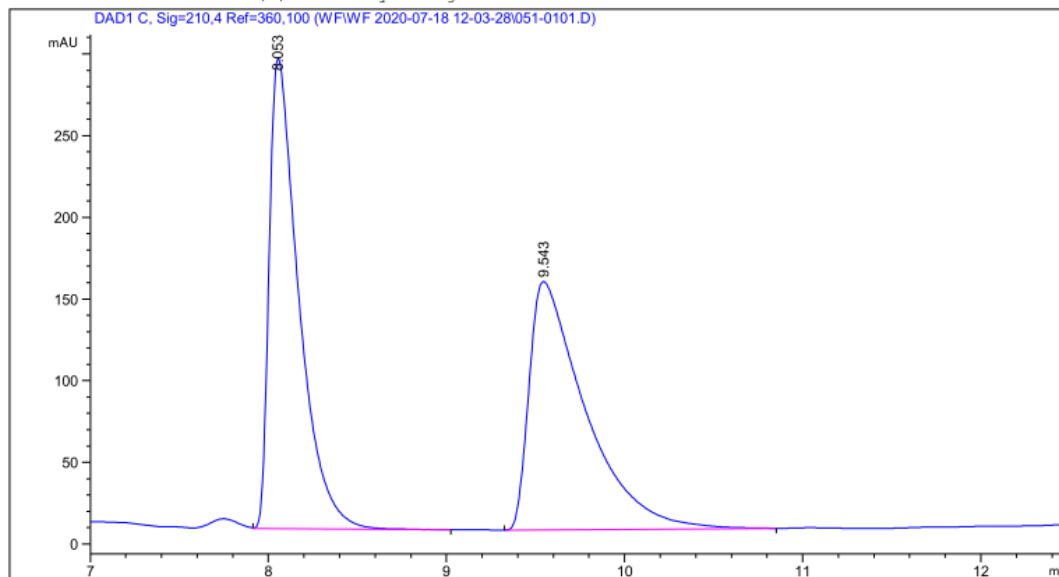

### Area Percent Report

```
=====
Sorted By      :      Signal
Multiplier     :      1.0000
Dilution       :      1.0000
Use Multiplier & Dilution Factor with ISTDs
=====
```

Signal 1: DAD1 C, Sig=210,4 Ref=360,100

| Peak # | RetTime [min] | Type | Width [min] | Area [mAU*s] | Height [mAU] | Area %  |
|--------|---------------|------|-------------|--------------|--------------|---------|
| 1      | 8.053         | VB   | 0.1700      | 3308.05225   | 288.11914    | 49.8472 |
| 2      | 9.543         | BB   | 0.3135      | 3328.33325   | 151.98228    | 50.1528 |

Totals :                                    6636.38550   440.10143

# Chiral-2f

Data File C:\CHEM32\1\DATA\WF\WF 2020-07-18 12-03-28\052-0201.D  
Sample Name: Ac-n-Pent-9-101-2

=====  
Acq. Operator : 系统 Seq. Line : 2  
Acq. Instrument : LC2 Location : Vial 52  
Injection Date : 7/18/2020 12:24:42 PM Inj : 1  
 Inj Volume: 5.000 µl  
Acq. Method : C:\CHEM32\1\DATA\WF\WF 2020-07-18 12-03-28\WF-80-20-0.7-5UL-15MIN.M  
Last changed : 7/18/2020 12:04:14 PM by 系统  
Analysis Method : C:\CHEM32\1\DATA\TDS\TDS 2020-07-18 08-58-02\TDS.M (Sequence Method)  
Last changed : 7/18/2020 8:58:02 AM by 系统  
Additional Info : Peak(s) manually integrated

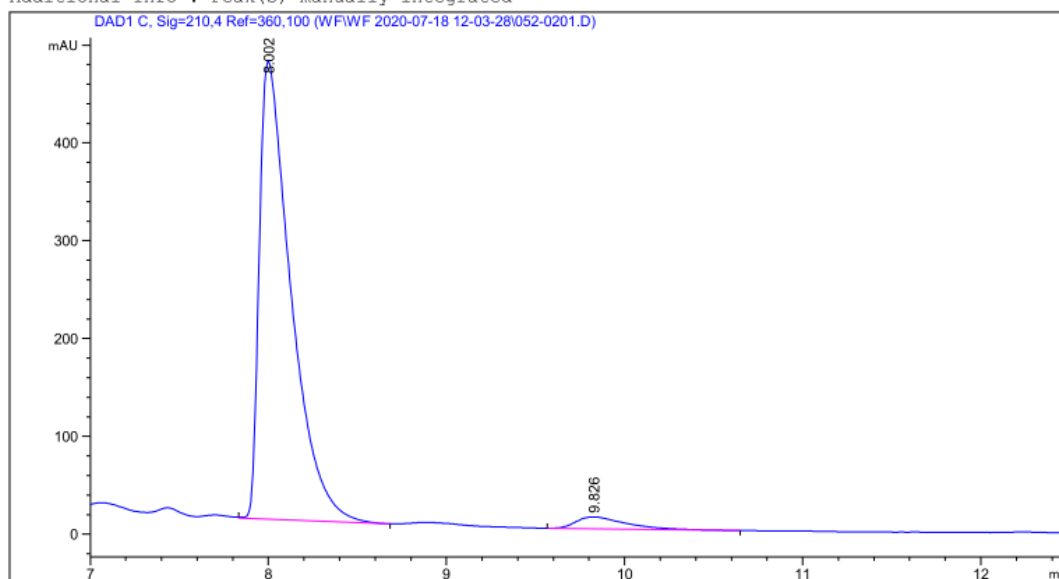

=====  
Area Percent Report  
=====

Sorted By : Signal  
Multiplier : 1.0000  
Dilution : 1.0000  
Use Multiplier & Dilution Factor with ISTDs

Signal 1: DAD1 C, Sig=210,4 Ref=360,100

| Peak # | RetTime [min] | Type | Width [min] | Area [mAU*s] | Height [mAU] | Area %  |
|--------|---------------|------|-------------|--------------|--------------|---------|
| 1      | 8.002         | VB   | 0.1815      | 5760.46484   | 468.31638    | 96.0190 |
| 2      | 9.826         | BB   | 0.2937      | 238.83366    | 12.13003     | 3.9810  |

Totals : 5999.29851 480.44641

=====  
\*\*\* End of Report \*\*\*



# Rac-2g

Data File C:\CHEM32\1\DATA\WF\WF 2020-07-25 09-51-22\053-0301.D  
Sample Name: Ac-异己基-9-24-rac

```
=====
Acq. Operator   : 系统                      Seq. Line :    3
Acq. Instrument : LC2                      Location  : Vial 53
Injection Date  : 7/25/2020 10:34:13 AM    Inj       :    1
                                           Inj Volume: 5.000 µl
Acq. Method     : C:\CHEM32\1\DATA\WF\WF 2020-07-25 09-51-22\WF-80-20-0.7-5UL-25MIN.M
Last changed    : 7/25/2020 9:51:22 AM by 系统
Analysis Method : C:\CHEM32\1\METHODS\WT.M
Last changed    : 7/16/2020 7:22:02 PM by 系统
Additional Info : Peak(s) manually integrated
=====
```

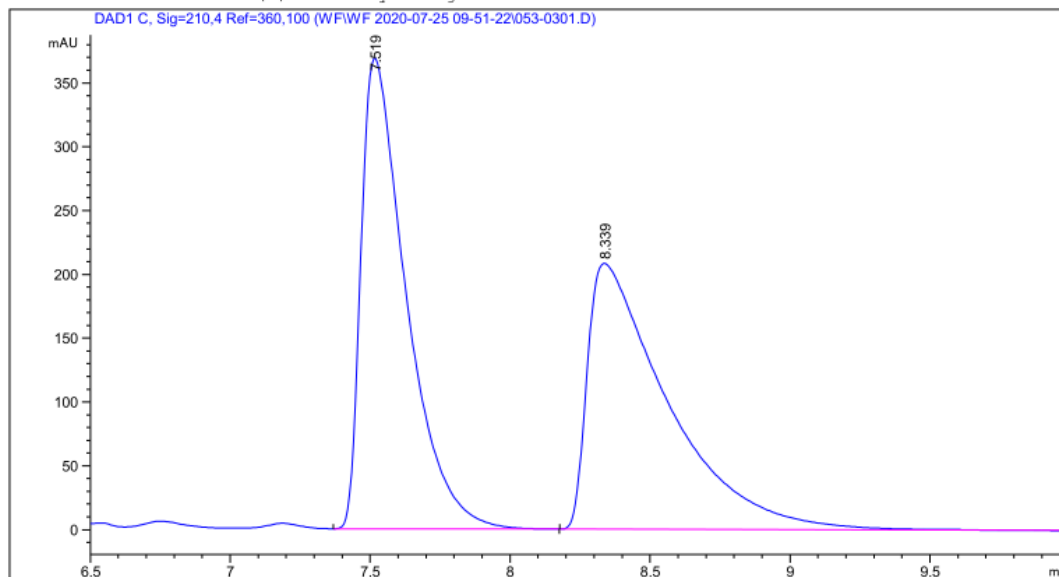

## Area Percent Report

```
Sorted By      : Signal
Multiplier     : 1.0000
Dilution       : 1.0000
Use Multiplier & Dilution Factor with ISTDs
```

Signal 1: DAD1 C, Sig=210,4 Ref=360,100

| Peak # | RetTime [min] | Type | Width [min] | Area [mAU*s] | Height [mAU] | Area %  |
|--------|---------------|------|-------------|--------------|--------------|---------|
| 1      | 7.519         | BB   | 0.1664      | 4127.68799   | 369.18008    | 49.8015 |
| 2      | 8.339         | BB   | 0.2850      | 4160.58936   | 208.33910    | 50.1985 |

Totals : 8288.27734 577.51918

\*\*\* End of Report \*\*\*

# Chiral-2g

Data File C:\CHEM32\1\DATA\WF\WF 2020-08-17 15-02-09\008-0801.D  
Sample Name: 0817-Me-Pent

```
=====
Acq. Operator   : 系统                      Seq. Line :    8
Acq. Instrument : LC2                      Location  : Vial 8
Injection Date  : 8/17/2020 5:02:08 PM      Inj       :    1
                                           Inj Volume: 5.000 µl
Different Inj Volume from Sequence ! Actual Inj Volume : 10.000 µl
Acq. Method     : C:\CHEM32\1\DATA\WF\WF 2020-08-17 15-02-09\WF-80-20-0.7-5UL-15MIN.M
Last changed    : 8/17/2020 3:57:00 PM by 系统
                (modified after loading)
Analysis Method : C:\CHEM32\1\DATA\LBW\LBW 2020-08-15 23-43-02\LBW.M (Sequence Method)
Last changed    : 8/15/2020 11:43:02 PM by 系统
Additional Info  : Peak(s) manually integrated
DAD1 C, Sig=210,4 Ref=360,100 (WF\WF 2020-08-17 15-02-09\008-0801.D)
```

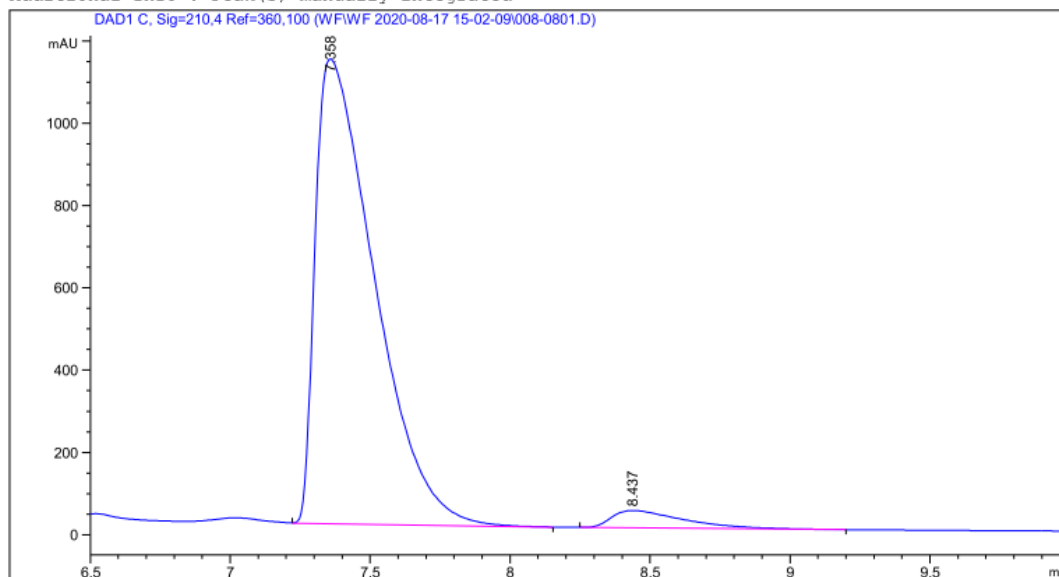

## Area Percent Report

```
Sorted By      : Signal
Multiplier     : 1.0000
Dilution       : 1.0000
Use Multiplier & Dilution Factor with ISTDs
```

Signal 1: DAD1 C, Sig=210,4 Ref=360,100

| Peak # | RetTime [min] | Type | Width [min] | Area [mAU*s] | Height [mAU] | Area %  |
|--------|---------------|------|-------------|--------------|--------------|---------|
| 1      | 7.358         | VB   | 0.2274      | 1.66038e4    | 1130.19458   | 95.6818 |
| 2      | 8.437         | BB   | 0.2576      | 749.34607    | 42.10359     | 4.3182  |

Totals : 1.73532e4 1172.29817

## Rac-2h

Data File C:\CHEM32\1\DATA\WF\WF 2020-07-28 15-09-07\091-0101.D  
Sample Name: Ac-benbingji-10-32-rac

```
=====
Acq. Operator   : 系统                      Seq. Line :    1
Acq. Instrument : LC2                      Location  : Vial 91
Injection Date  : 7/28/2020 3:10:02 PM      Inj       :    1
                                           Inj Volume: 5.000 µl
Acq. Method    : C:\CHEM32\1\DATA\WF\WF 2020-07-28 15-09-07\WF-80-20-0.7-5UL-25MIN.M
Last changed   : 7/28/2020 3:09:07 PM by 系统
Analysis Method: C:\CHEM32\1\DATA\LBW\LBW 2020-07-21 19-22-35\LBW.M (Sequence Method)
Last changed   : 7/21/2020 7:22:35 PM by 系统
Additional Info : Peak(s) manually integrated
=====
```

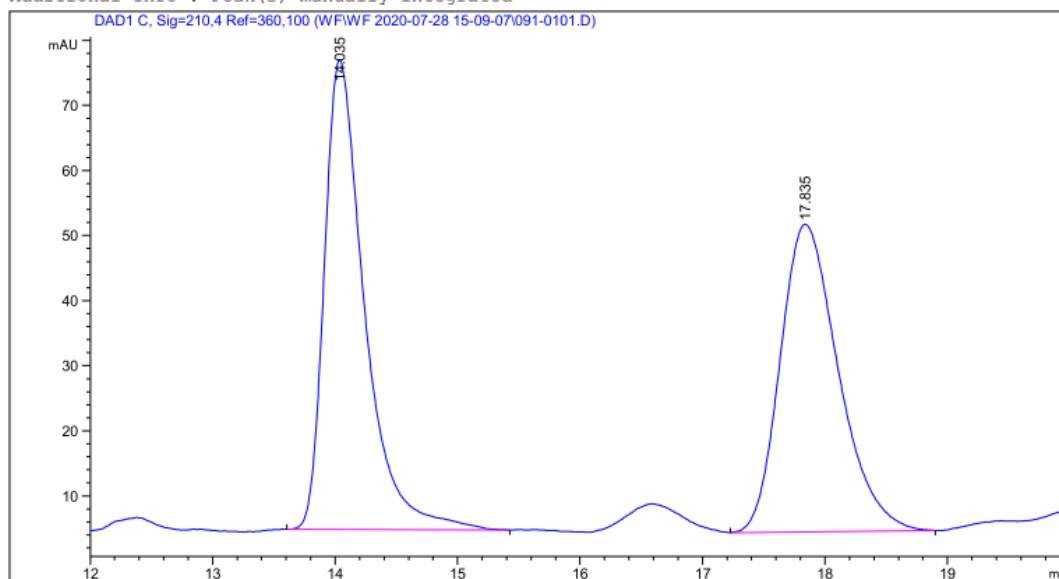

### Area Percent Report

```
Sorted By      : Signal
Multiplier     : 1.0000
Dilution       : 1.0000
Use Multiplier & Dilution Factor with ISTDs
```

Signal 1: DAD1 C, Sig=210,4 Ref=360,100

| Peak # | RetTime [min] | Type | Width [min] | Area [mAU*s] | Height [mAU] | Area %  |
|--------|---------------|------|-------------|--------------|--------------|---------|
| 1      | 14.035        | BB   | 0.3440      | 1643.74500   | 72.09856     | 51.3429 |
| 2      | 17.835        | BB   | 0.5005      | 1557.76086   | 47.26683     | 48.6571 |

Totals : 3201.50586 119.36539

\*\*\* End of Report \*\*\*

# Chiral-2h

Data File C:\CHEM32\1\DATA\WF\WF 2020-07-29 14-13-43\067-0101.D  
Sample Name: Ac-bengbingji-2g

```
=====
Acq. Operator   : 系统                      Seq. Line :    1
Acq. Instrument : LC2                      Location  : Vial 67
Injection Date  : 7/29/2020 2:14:38 PM      Inj       :    1
                                           Inj Volume: 20.000 µl
Different Inj Volume from Sequence ! Actual Inj Volume : 5.000 µl
Acq. Method     : C:\CHEM32\1\DATA\WF\WF 2020-07-29 14-13-43\WF-80-20-0.7-20UL-30MIN.M
Last changed    : 7/29/2020 2:40:35 PM by 系统
                 (modified after loading)
Analysis Method : C:\CHEM32\1\DATA\LBW\LBW 2020-07-21 19-22-35\LBW.M (Sequence Method)
Last changed    : 7/21/2020 7:22:35 PM by 系统
Additional Info  : Peak(s) manually integrated
=====
```

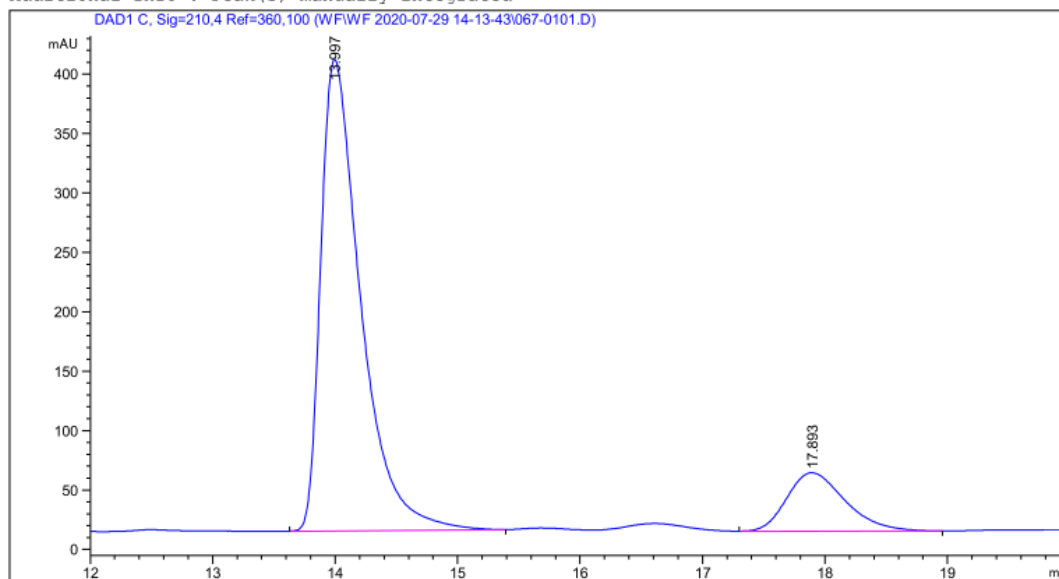

## Area Percent Report

```
Sorted By      : Signal
Multiplier     : 1.0000
Dilution       : 1.0000
Use Multiplier & Dilution Factor with ISTDs
```

Signal 1: DAD1 C, Sig=210,4 Ref=360,100

| Peak # | RetTime [min] | Type | Width [min] | Area [mAU*s] | Height [mAU] | Area %  |
|--------|---------------|------|-------------|--------------|--------------|---------|
| 1      | 13.997        | BB   | 0.3404      | 8993.10547   | 396.84662    | 84.6858 |
| 2      | 17.893        | BB   | 0.5022      | 1626.27808   | 49.13386     | 15.3142 |

Totals : 1.06194e4 445.98048

# Rac-2i

Data File C:\CHEM32\1\DATA\WF\WF 2020-07-06 23-06-18\062-0201.D  
Sample Name: Ac-Cp-Rac

```
=====
Acq. Operator   : 系统                               Seq. Line :    2
Acq. Instrument : LC2                               Location  : Vial 62
Injection Date  : 7/6/2020 11:39:02 PM             Inj       :    1
                                                    Inj Volume: 20.000 µl
Different Inj Volume from Sequence ! Actual Inj Volume : 5.000 µl
Acq. Method    : C:\CHEM32\1\DATA\WF\WF 2020-07-06 23-06-18\WF-80-20-0.7-20UL-30MIN.M
Last changed   : 7/6/2020 11:06:19 PM by 系统
Analysis Method : C:\CHEM32\1\DATA\TYH\TYH 2020-07-13 15-10-31\TYH.M (Sequence Method)
Last changed   : 7/13/2020 3:10:31 PM by 系统
Additional Info : Peak(s) manually integrated
=====
```

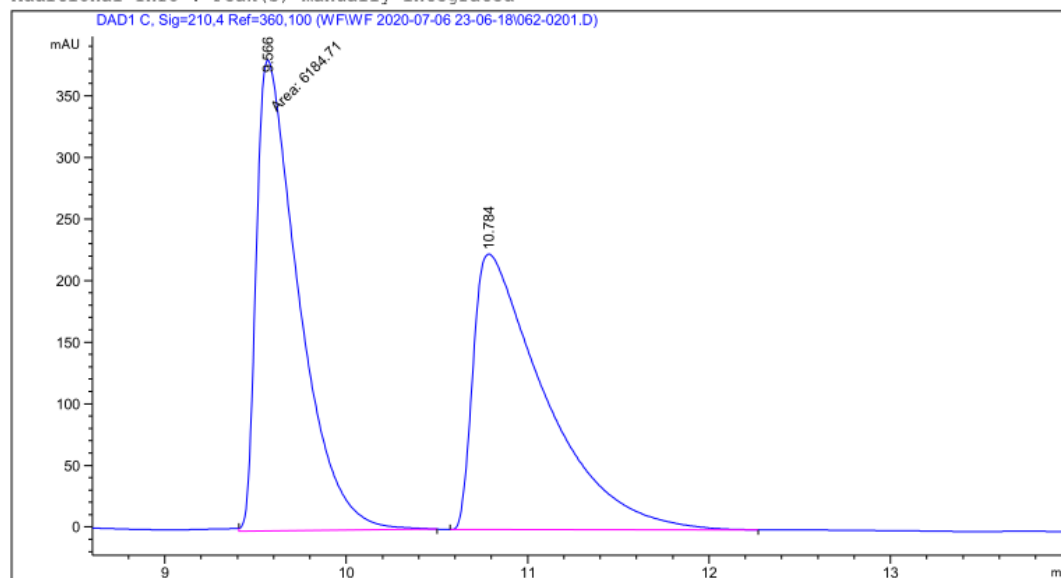

## Area Percent Report

```
Sorted By      : Signal
Multiplier     : 1.0000
Dilution       : 1.0000
Use Multiplier & Dilution Factor with ISTDs
```

Signal 1: DAD1 C, Sig=210,4 Ref=360,100

| Peak # | RetTime [min] | Type | Width [min] | Area [mAU*s] | Height [mAU] | Area %  |
|--------|---------------|------|-------------|--------------|--------------|---------|
| 1      | 9.566         | MM   | 0.2696      | 6184.71338   | 382.35037    | 50.1564 |
| 2      | 10.784        | BB   | 0.3906      | 6146.13477   | 223.64954    | 49.8436 |

Totals : 1.23308e4 605.99991

# Chiral-2i

Data File C:\CHEM32\1\DATA\WF\WF 2020-08-17 15-02-09\006-0601.D  
Sample Name: 0817-Cp

```
=====
Acq. Operator   : 系统                      Seq. Line :    6
Acq. Instrument : LC2                      Location  : Vial 6
Injection Date  : 8/17/2020 4:30:05 PM      Inj       :    1
                                           Inj Volume: 5.000 µl
Different Inj Volume from Sequence ! Actual Inj Volume : 10.000 µl
Acq. Method     : C:\CHEM32\1\DATA\WF\WF 2020-08-17 15-02-09\WF-80-20-0.7-5UL-15MIN.M
Last changed    : 8/17/2020 3:57:00 PM by 系统
                 (modified after loading)
Analysis Method : C:\CHEM32\1\DATA\LBW\LBW 2020-08-15 23-43-02\LBW.M (Sequence Method)
Last changed    : 8/15/2020 11:43:02 PM by 系统
Additional Info  : Peak(s) manually integrated
DAD1 C, Sig=210,4 Ref=360,100 (WF\WF 2020-08-17 15-02-09\006-0601.D)
```

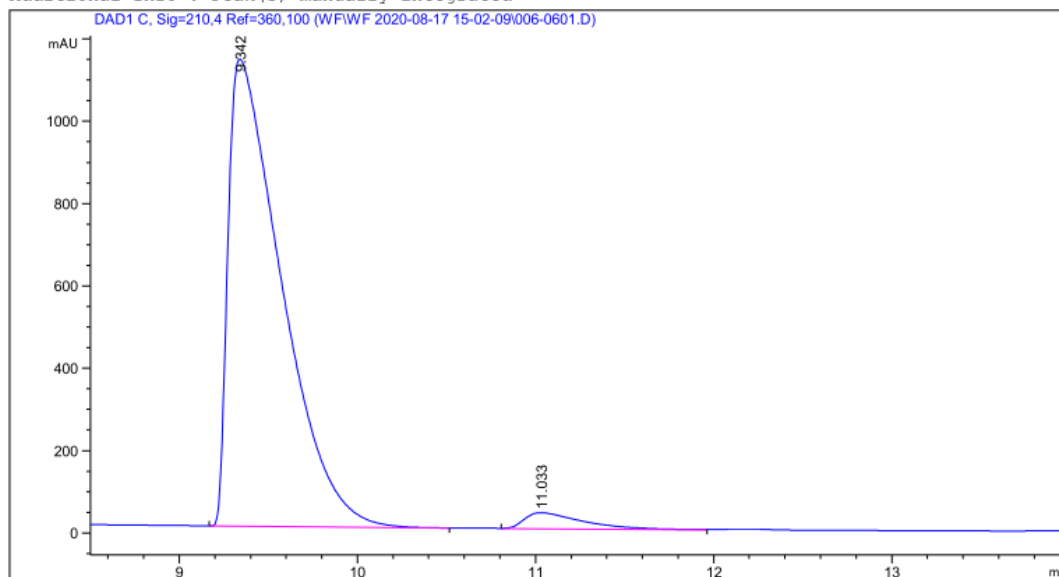

## Area Percent Report

```
Sorted By      : Signal
Multiplier     : 1.0000
Dilution       : 1.0000
Use Multiplier & Dilution Factor with ISTDs
```

Signal 1: DAD1 C, Sig=210,4 Ref=360,100

| Peak # | RetTime [min] | Type | Width [min] | Area [mAU*s] | Height [mAU] | Area %  |
|--------|---------------|------|-------------|--------------|--------------|---------|
| 1      | 9.342         | BB   | 0.3163      | 2.35618e4    | 1134.53796   | 96.4964 |
| 2      | 11.033        | BV   | 0.3239      | 855.47681    | 38.40813     | 3.5036  |

Totals : 2.44173e4 1172.94610

# Rac-2j

Data File C:\CHEM32\1\DATA\WF\WF 2020-07-14 13-16-29\061-0101.D  
Sample Name: Ac-Cy-Rac

```
=====
Acq. Operator   : 系统                      Seq. Line :    1
Acq. Instrument : LC2                      Location  : Vial 61
Injection Date  : 7/14/2020 1:17:25 PM      Inj       :    1
                                           Inj Volume: 5.000 µl
Acq. Method     : C:\CHEM32\1\DATA\WF\WF 2020-07-14 13-16-29\WF-80-20-0.7-5UL-25MIN.M
Last changed    : 7/14/2020 1:16:29 PM by 系统
Analysis Method : C:\CHEM32\1\DATA\TYH\TYH 2020-07-13 15-10-31\TYH.M (Sequence Method)
Last changed    : 7/13/2020 3:10:31 PM by 系统
Additional Info  : Peak(s) manually integrated
=====
```

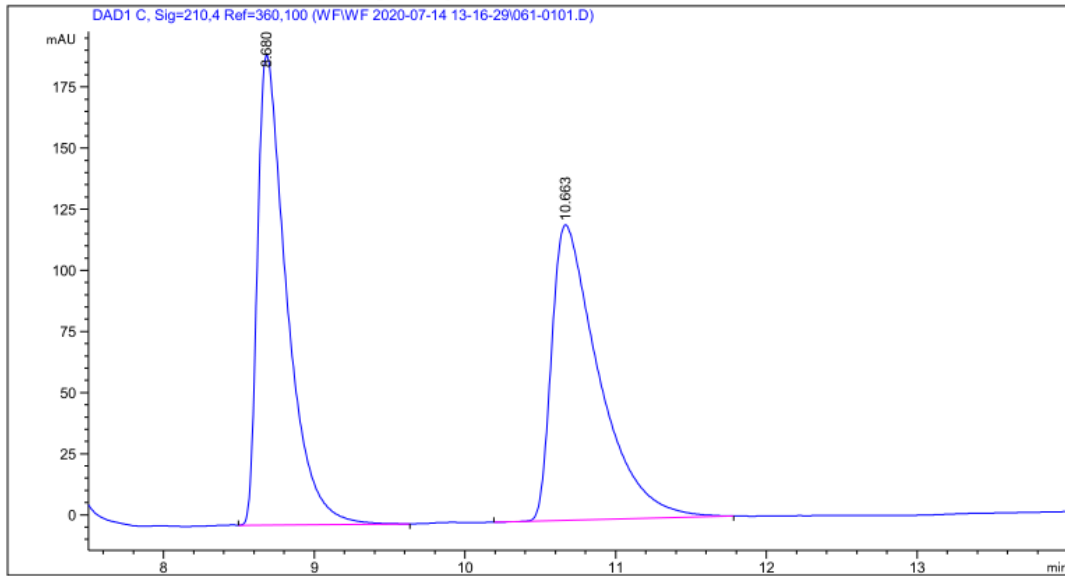

## Area Percent Report

```
Sorted By      : Signal
Multiplier     : 1.0000
Dilution       : 1.0000
Use Multiplier & Dilution Factor with ISTDs
```

Signal 1: DAD1 C, Sig=210,4 Ref=360,100

| Peak # | RetTime [min] | Type | Width [min] | Area [mAU*s] | Height [mAU] | Area %  |
|--------|---------------|------|-------------|--------------|--------------|---------|
| 1      | 8.680         | BB   | 0.1994      | 2596.59595   | 192.41283    | 49.6262 |
| 2      | 10.663        | BB   | 0.3205      | 2635.70801   | 120.84343    | 50.3738 |

Totals : 5232.30396 313.25626

\*\*\* End of Report \*\*\*

# Chiral-2j

Data File C:\CHEM32\1\DATA\WF\WF 2020-07-29 14-13-43\052-0401.D  
Sample Name: Ac-cy-2i

```
=====
Acq. Operator   : 系统                      Seq. Line :    4
Acq. Instrument : LC2                      Location  : Vial 52
Injection Date  : 7/29/2020 3:23:39 PM      Inj       :    1
                                           Inj Volume: 10.000 µl
Different Inj Volume from Sequence ! Actual Inj Volume : 5.000 µl
Acq. Method     : C:\CHEM32\1\DATA\WF\WF 2020-07-29 14-13-43\WF-80-20-0.7-10UL-20MIN.M
Last changed    : 7/29/2020 2:13:43 PM by 系统
Analysis Method : C:\CHEM32\1\DATA\LBW\LBW 2020-07-21 19-22-35\LBW.M (Sequence Method)
Last changed    : 7/21/2020 7:22:35 PM by 系统
Additional Info  : Peak(s) manually integrated
=====
```

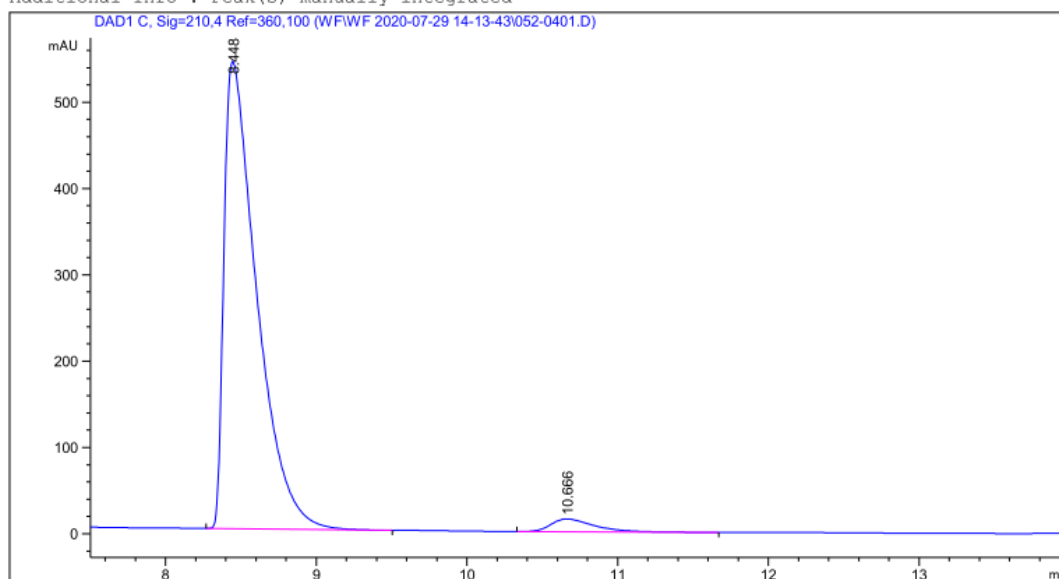

## Area Percent Report

```
Sorted By      : Signal
Multiplier     : 1.0000
Dilution       : 1.0000
Use Multiplier & Dilution Factor with ISTDs
```

Signal 1: DAD1 C, Sig=210,4 Ref=360,100

| Peak # | RetTime [min] | Type | Width [min] | Area [mAU*s] | Height [mAU] | Area %  |
|--------|---------------|------|-------------|--------------|--------------|---------|
| 1      | 8.448         | BB   | 0.2217      | 8156.06543   | 541.42072    | 96.4624 |
| 2      | 10.666        | BB   | 0.3002      | 299.11270    | 14.90228     | 3.5376  |

Totals : 8455.17813 556.32300



# Rac-2k

Data File C:\CHEM32\1\DATA\WF\WF 2020-07-25 09-51-22\055-0501.D  
Sample Name: Ac-cHep-9-25-rac

```
=====
Acq. Operator   : 系统                      Seq. Line :    5
Acq. Instrument : LC2                      Location  : Vial 55
Injection Date  : 7/25/2020 11:08:12 AM    Inj       :    1
                                           Inj Volume: 5.000 µl
Acq. Method     : C:\CHEM32\1\DATA\WF\WF 2020-07-25 09-51-22\WF-80-20-0.7-5UL-25MIN.M
Last changed    : 7/25/2020 11:08:21 AM by 系统
                 (modified after loading)
Analysis Method : C:\CHEM32\1\METHODS\WT.M
Last changed    : 7/16/2020 7:22:02 PM by 系统
Additional Info  : Peak(s) manually integrated
=====
```

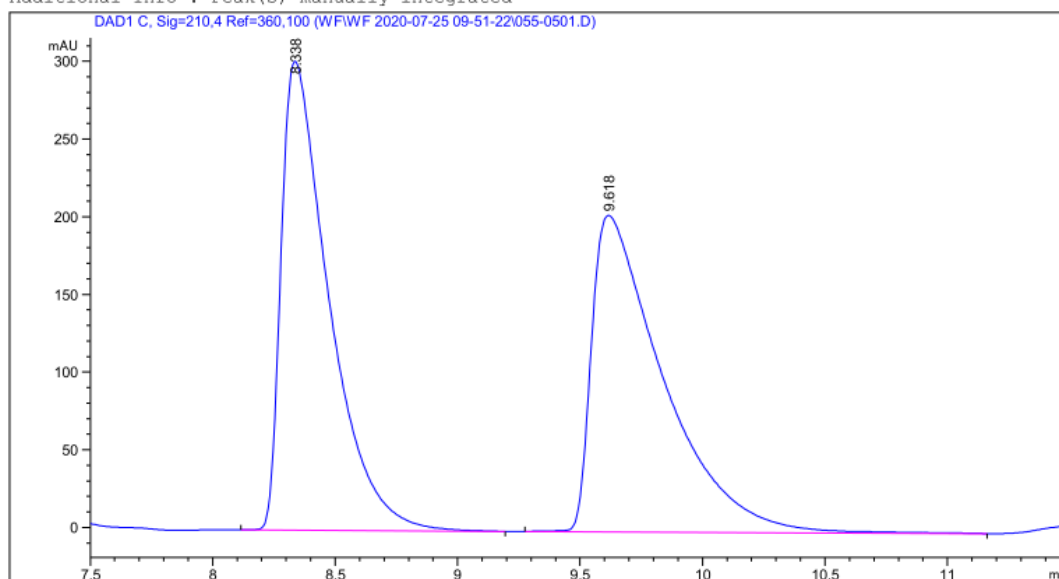

## Area Percent Report

```
Sorted By      : Signal
Multiplier     : 1.0000
Dilution       : 1.0000
Use Multiplier & Dilution Factor with ISTDs
```

Signal 1: DAD1 C, Sig=210,4 Ref=360,100

| Peak # | RetTime [min] | Type | Width [min] | Area [mAU*s] | Height [mAU] | Area %  |
|--------|---------------|------|-------------|--------------|--------------|---------|
| 1      | 8.338         | BB   | 0.1998      | 4083.20044   | 301.90570    | 49.7074 |
| 2      | 9.618         | BB   | 0.2905      | 4131.27246   | 203.80452    | 50.2926 |

Totals : 8214.47290 505.71022

# Chiral-2k

Data File C:\CHEM32\1\DATA\WF\WF 2020-08-17 15-02-09\007-0701.D  
 Sample Name: 0817-cHep

```

=====
Acq. Operator   : 系统                      Seq. Line :    7
Acq. Instrument : LC2                      Location  : Vial 7
Injection Date  : 8/17/2020 4:46:05 PM      Inj       :    1
                                           Inj Volume: 5.000 µl
Different Inj Volume from Sequence ! Actual Inj Volume : 10.000 µl
Acq. Method     : C:\CHEM32\1\DATA\WF\WF 2020-08-17 15-02-09\WF-80-20-0.7-5UL-15MIN.M
Last changed    : 8/17/2020 3:57:00 PM by 系统
                 (modified after loading)
Analysis Method : C:\CHEM32\1\DATA\LBW\LBW 2020-08-15 23-43-02\LBW.M (Sequence Method)
Last changed    : 8/15/2020 11:43:02 PM by 系统
Additional Info  : Peak(s) manually integrated
  
```

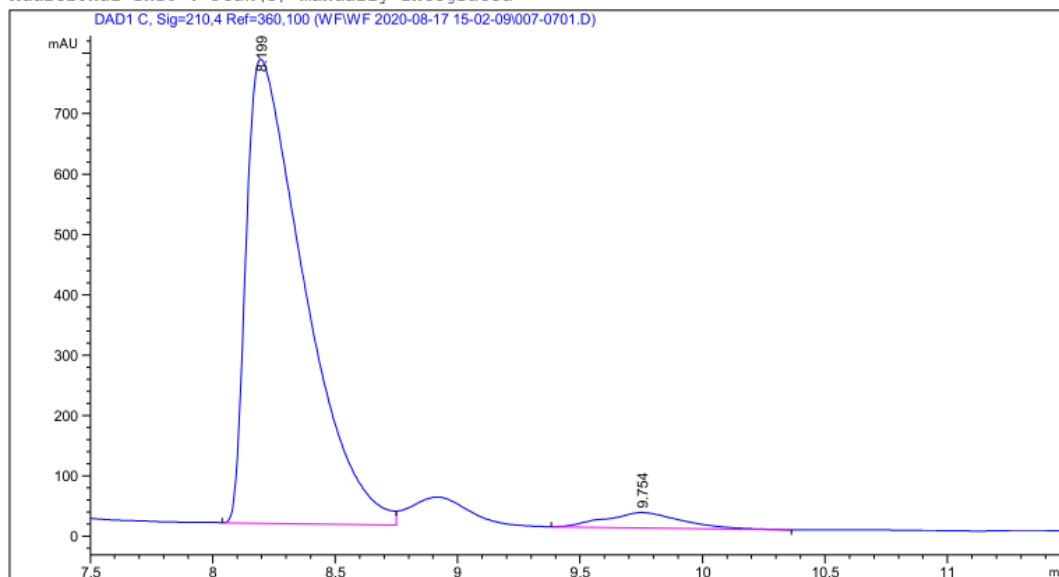

## Area Percent Report

```

Sorted By      :      Signal
Multiplier     :      1.0000
Dilution       :      1.0000
Use Multiplier & Dilution Factor with ISTDs
  
```

Signal 1: DAD1 C, Sig=210,4 Ref=360,100

| Peak # | RetTime [min] | Type | Width [min] | Area [mAU*s] | Height [mAU] | Area %  |
|--------|---------------|------|-------------|--------------|--------------|---------|
| 1      | 8.199         | BV   | 0.2472      | 1.26003e4    | 768.91077    | 95.7940 |
| 2      | 9.754         | VB   | 0.3125      | 553.23853    | 25.35692     | 4.2060  |

Totals :                                    1.31536e4    794.26768

# Rac-21

Data File C:\CHEM32\1\DATA\WF\WF 2020-07-28 15-09-07\093-0201.D  
Sample Name: Ac-diMe-Cy-10-33-rac

```
=====
Acq. Operator   : 系统                      Seq. Line :    2
Acq. Instrument : LC2                      Location  : Vial 93
Injection Date  : 7/28/2020 3:31:04 PM      Inj       :    1
                                           Inj Volume: 5.000 µl
Acq. Method     : C:\CHEM32\1\DATA\WF\WF 2020-07-28 15-09-07\WF-80-20-0.7-5UL-25MIN.M
Last changed    : 7/28/2020 3:09:07 PM by 系统
Analysis Method : C:\CHEM32\1\DATA\LBW\LBW 2020-07-21 19-22-35\LBW.M (Sequence Method)
Last changed    : 7/21/2020 7:22:35 PM by 系统
Additional Info  : Peak(s) manually integrated
=====
```

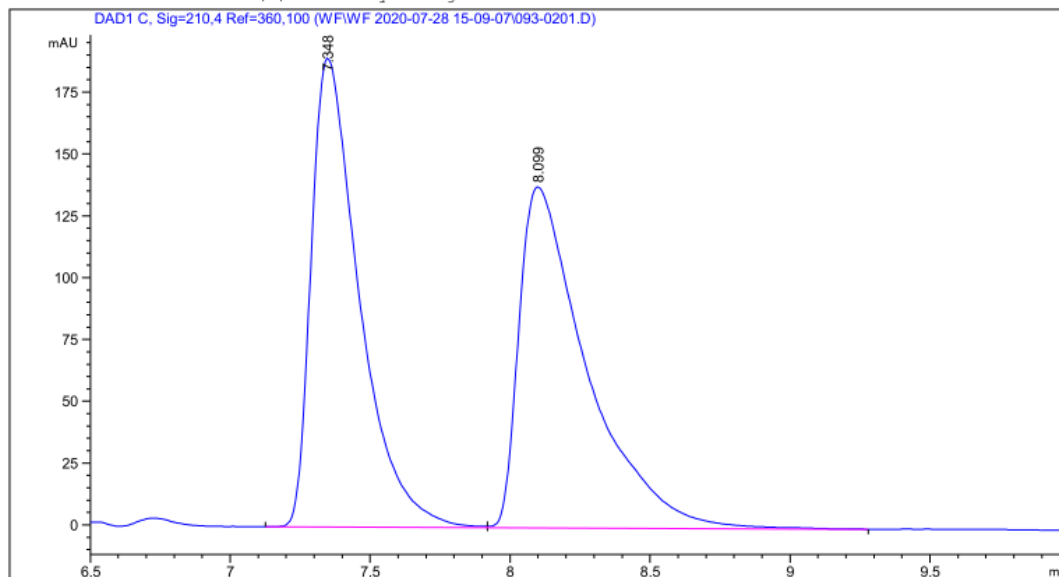

## Area Percent Report

```
Sorted By      : Signal
Multiplier     : 1.0000
Dilution       : 1.0000
Use Multiplier & Dilution Factor with ISTDs
```

Signal 1: DAD1 C, Sig=210,4 Ref=360,100

| Peak # | RetTime [min] | Type | Width [min] | Area [mAU*s] | Height [mAU] | Area %  |
|--------|---------------|------|-------------|--------------|--------------|---------|
| 1      | 7.348         | BV   | 0.1790      | 2259.23193   | 189.57739    | 49.3162 |
| 2      | 8.099         | VB   | 0.2444      | 2321.87915   | 137.90988    | 50.6838 |

Totals : 4581.11108 327.48727

\*\*\* End of Report \*\*\*

# Chiral-21

Data File C:\CHEM32\1\DATA\WF\WF 2020-08-14 14-39-12\002-0201.D  
Sample Name: 0814-2j

```
=====
Acq. Operator   : 系统                      Seq. Line :    2
Acq. Instrument : LC2                      Location  : Vial 2
Injection Date  : 8/14/2020 2:57:08 PM      Inj       :    1
                                           Inj Volume: 5.000 µl
Different Inj Volume from Sequence ! Actual Inj Volume : 10.000 µl
Acq. Method    : C:\CHEM32\1\DATA\WF\WF 2020-08-14 14-39-12\WF-80-20-0.7-5UL-15MIN.M
Last changed   : 8/14/2020 2:39:12 PM by 系统
Analysis Method : C:\CHEM32\1\DATA\LBW\LBW 2020-08-14 13-51-26\LBW.M (Sequence Method)
Last changed   : 8/14/2020 1:51:26 PM by 系统
Additional Info : Peak(s) manually integrated
=====
```

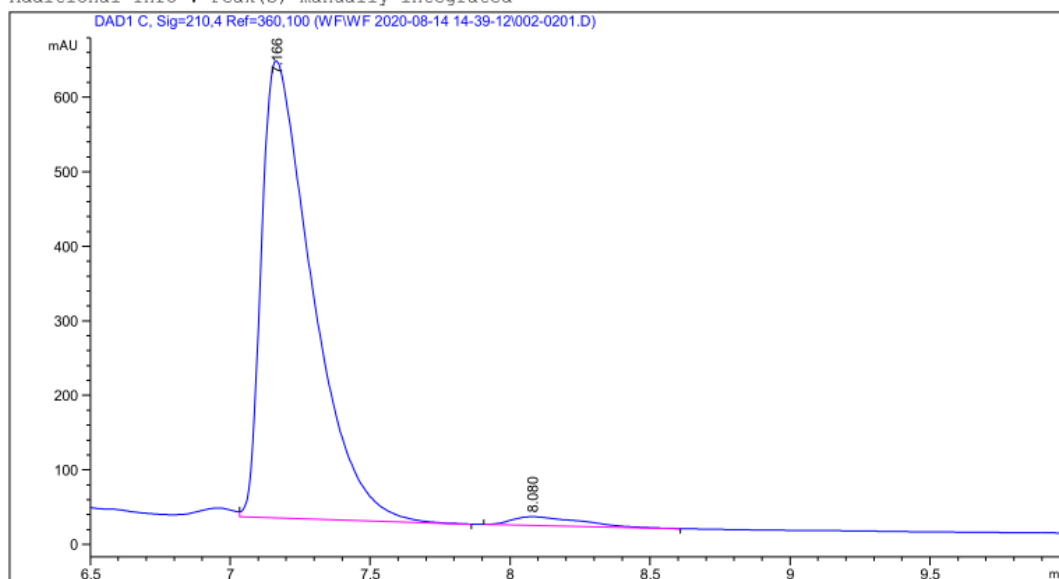

## Area Percent Report

```
Sorted By      : Signal
Multiplier     : 1.0000
Dilution       : 1.0000
Use Multiplier & Dilution Factor with ISTDs
```

Signal 1: DAD1 C, Sig=210,4 Ref=360,100

| Peak # | RetTime [min] | Type | Width [min] | Area [mAU*s] | Height [mAU] | Area %  |
|--------|---------------|------|-------------|--------------|--------------|---------|
| 1      | 7.166         | VB   | 0.1888      | 7720.56543   | 613.55286    | 97.4269 |
| 2      | 8.080         | BB   | 0.2429      | 203.90529    | 11.72408     | 2.5731  |

Totals : 7924.47072 625.27694

# Rac-2m (cis+trans)

Data File C:\CHEM32\1\DATA\WF\WF 2020-08-11 08-04-19\062-0401.D  
Sample Name: zyx-2n-rac

```
=====
Acq. Operator   : 系统                               Seq. Line :    4
Acq. Instrument : LC2                               Location  : Vial 62
Injection Date  : 8/11/2020 8:56:16 AM             Inj       :    1
                                                    Inj Volume: 2.000 µl
Different Inj Volume from Sequence ! Actual Inj Volume : 10.000 µl
Acq. Method     : C:\CHEM32\1\DATA\WF\WF 2020-08-11 08-04-19\WF-80-20-0.7-20UL-30MIN.M
Last changed    : 8/11/2020 8:36:39 AM by 系统
Analysis Method : C:\CHEM32\1\DATA\LBW\LBW 2020-08-14 13-51-26\LBW.M (Sequence Method)
Last changed    : 8/14/2020 1:51:26 PM by 系统
Additional Info : Peak(s) manually integrated
=====
```

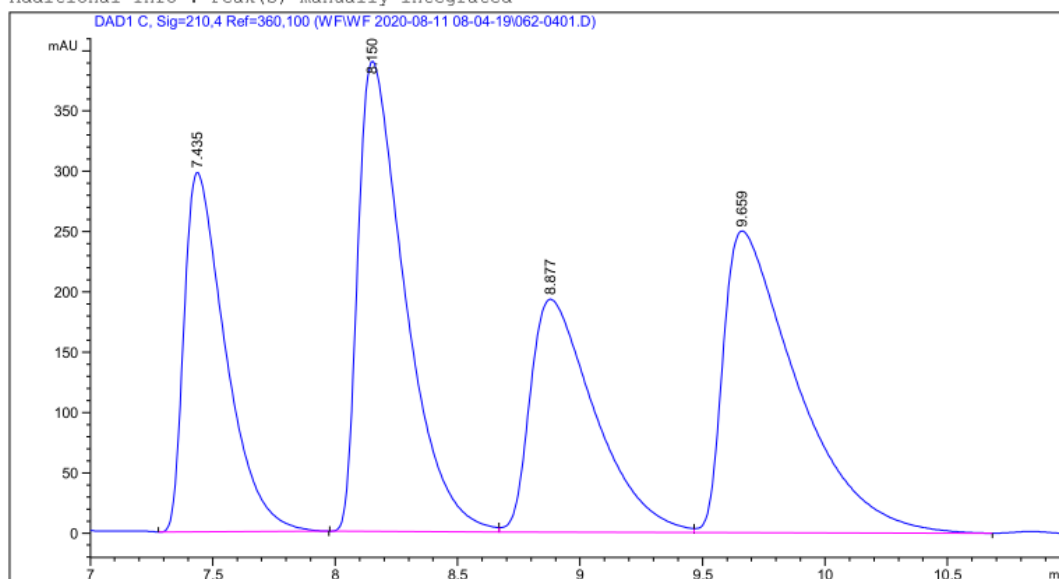

## Area Percent Report

```
Sorted By      : Signal
Multiplier     : 1.0000
Dilution       : 1.0000
Use Multiplier & Dilution Factor with ISTDs
```

Signal 1: DAD1 C, Sig=210,4 Ref=360,100

| Peak # | RetTime [min] | Type | Width [min] | Area [mAU*s] | Height [mAU] | Area %  |
|--------|---------------|------|-------------|--------------|--------------|---------|
| 1      | 7.435         | BB   | 0.1769      | 3498.80615   | 298.10947    | 20.0374 |
| 2      | 8.150         | BV   | 0.1998      | 5205.73633   | 389.86603    | 29.8128 |
| 3      | 8.877         | VV   | 0.2758      | 3537.16748   | 193.03447    | 20.2570 |
| 4      | 9.659         | VB   | 0.3055      | 5219.70898   | 250.11557    | 29.8928 |

Totals : 1.74614e4 1131.12553

# Chiral-2m (cis+trans)

Data File C:\CHEM32\1\DATA\WF\WF 2020-08-14 14-39-12\062-0501.D  
 Sample Name: 0814-2p

```

=====
Acq. Operator   : 系统                      Seq. Line :    5
Acq. Instrument : LC2                      Location  : Vial 62
Injection Date  : 8/14/2020 3:45:13 PM      Inj       :    1
                                           Inj Volume: 5.000 µl
Different Inj Volume from Sequence !      Actual Inj Volume : 10.000 µl
Acq. Method     : C:\CHEM32\1\DATA\WF\WF 2020-08-14 14-39-12\WF-80-20-0.7-5UL-15MIN.M
Last changed    : 8/14/2020 3:43:30 PM by 系统
                                           (modified after loading)
Analysis Method : C:\CHEM32\1\DATA\LBW\LBW 2020-08-14 13-51-26\LBW.M (Sequence Method)
Last changed    : 8/14/2020 1:51:26 PM by 系统
Additional Info  : Peak(s) manually integrated
  
```

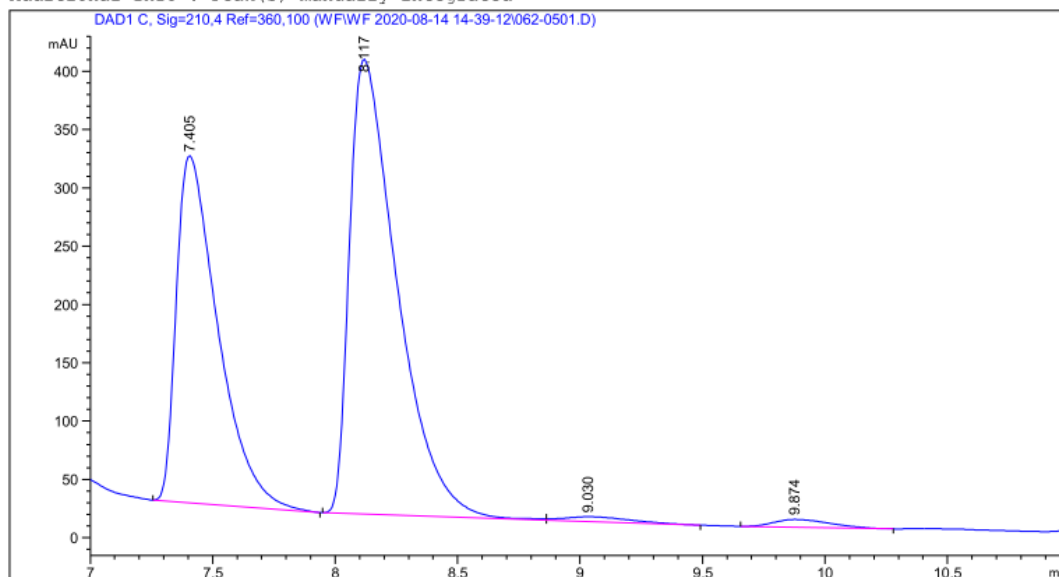

## Area Percent Report

```

Sorted By      : Signal
Multiplier     : 1.0000
Dilution      : 1.0000
Use Multiplier & Dilution Factor with ISTDs
  
```

Signal 1: DAD1 C, Sig=210,4 Ref=360,100

| Peak # | RetTime [min] | Type | Width [min] | Area [mAU*s] | Height [mAU] | Area %  |
|--------|---------------|------|-------------|--------------|--------------|---------|
| 1      | 7.405         | BB   | 0.1776      | 3510.71533   | 297.55807    | 39.2546 |
| 2      | 8.117         | BV   | 0.2031      | 5249.95801   | 389.88605    | 58.7017 |
| 3      | 9.030         | VB   | 0.2534      | 76.05803     | 4.04531      | 0.8504  |
| 4      | 9.874         | BB   | 0.2455      | 106.72096    | 6.64102      | 1.1933  |

Totals : 8943.45233 698.13045

# Chiral-2m-isomer

Data File C:\CHEM32\1\DATA\WF\WF 2020-08-14 14-39-12\062-0501.D  
Sample Name: 0814-2p

```
=====
Acq. Operator   : 系统                      Seq. Line :    5
Acq. Instrument : LC2                      Location  : Vial 62
Injection Date  : 8/14/2020 3:45:13 PM      Inj       :    1
                                           Inj Volume: 5.000 µl
Different Inj Volume from Sequence ! Actual Inj Volume : 10.000 µl
Acq. Method     : C:\CHEM32\1\DATA\WF\WF 2020-08-14 14-39-12\WF-80-20-0.7-5UL-15MIN.M
Last changed    : 8/14/2020 3:43:30 PM by 系统
                 (modified after loading)
Analysis Method : C:\CHEM32\1\DATA\LBW\LBW 2020-08-14 13-51-26\LBW.M (Sequence Method)
Last changed    : 8/14/2020 1:51:26 PM by 系统
Additional Info  : Peak(s) manually integrated
=====
```

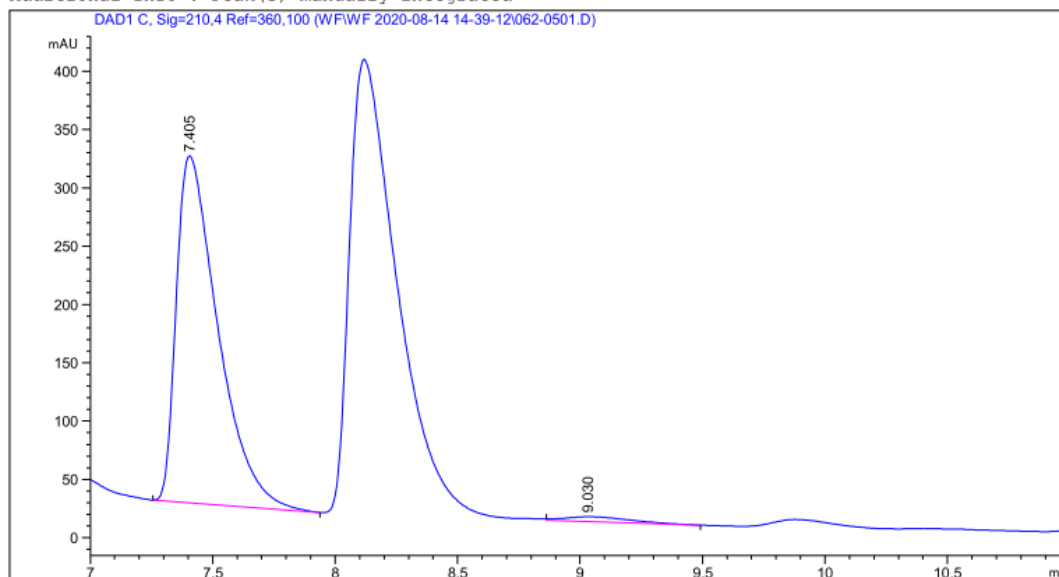

## Area Percent Report

```
Sorted By      : Signal
Multiplier     : 1.0000
Dilution       : 1.0000
Use Multiplier & Dilution Factor with ISTDs
```

Signal 1: DAD1 C, Sig=210,4 Ref=360,100

| Peak # | RetTime [min] | Type | Width [min] | Area [mAU*s] | Height [mAU] | Area %  |
|--------|---------------|------|-------------|--------------|--------------|---------|
| 1      | 7.405         | BB   | 0.1776      | 3510.71533   | 297.55807    | 97.8795 |
| 2      | 9.030         | VB   | 0.2534      | 76.05803     | 4.04531      | 2.1205  |

Totals : 3586.77336 301.60339

# Chiral-2m-isomer

Data File C:\CHEM32\1\DATA\WF\WF 2020-08-14 14-39-12\062-0501.D  
Sample Name: 0814-2p

```
=====
Acq. Operator   : 系统                      Seq. Line :    5
Acq. Instrument : LC2                      Location  : Vial 62
Injection Date  : 8/14/2020 3:45:13 PM     Inj       :    1
                                           Inj Volume: 5.000 µl
Different Inj Volume from Sequence ! Actual Inj Volume : 10.000 µl
Acq. Method    : C:\CHEM32\1\DATA\WF\WF 2020-08-14 14-39-12\WF-80-20-0.7-5UL-15MIN.M
Last changed   : 8/14/2020 3:43:30 PM by 系统
               (modified after loading)
Analysis Method: C:\CHEM32\1\DATA\LBW\LBW 2020-08-14 13-51-26\LBW.M (Sequence Method)
Last changed   : 8/14/2020 1:51:26 PM by 系统
Additional Info : Peak(s) manually integrated
=====
```

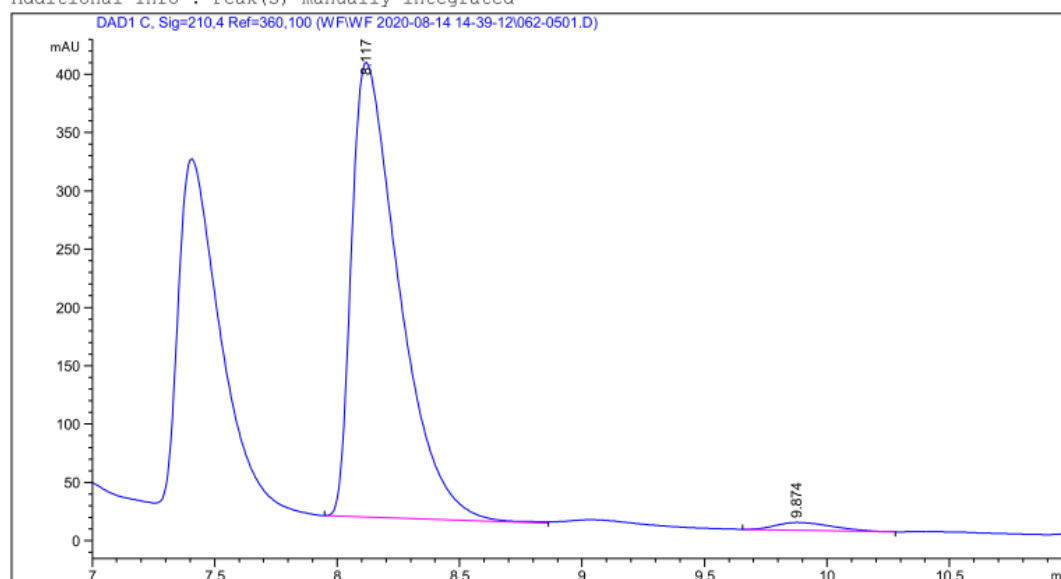

## Area Percent Report

```
Sorted By      : Signal
Multiplier     : 1.0000
Dilution       : 1.0000
Use Multiplier & Dilution Factor with ISTDs
```

Signal 1: DAD1 C, Sig=210,4 Ref=360,100

| Peak # | RetTime [min] | Type | Width [min] | Area [mAU*s] | Height [mAU] | Area %  |
|--------|---------------|------|-------------|--------------|--------------|---------|
| 1      | 8.117         | BV   | 0.2031      | 5249.95801   | 389.88605    | 98.0077 |
| 2      | 9.874         | BB   | 0.2455      | 106.72096    | 6.64102      | 1.9923  |

Totals : 5356.67897 396.52707
